# Supplementary material for: Citrus flavanone metabolites protect pancreatic β-cells against cholesterol stress through a multi-proteomic mechanism
Source: Royal Society of Chemistry journal article supplement (doi:10.1039/d2fo02479a), 2022-01-01
Supplement: d2fo02479a1.pdf [file d2fo02479a1.pdf]

## SUPPLEMENTARY MATERIAL

### **Citrus flavanone metabolites protect pancreatic $\beta$ -cells against cholesterol stress through multi-proteomic mechanism**

Layanne Nascimento Fraga<sup>a,b</sup>, Dragan Milenkovic<sup>c</sup>, Sara Lima Anacleto<sup>a,b</sup>, Franco M.

Lajolo<sup>a,b</sup>, and Neuza M. A. Hassimotto<sup>a,b\*</sup>

<sup>a</sup>Department of Food Science and Nutrition, School of Pharmaceutical Science,  
University of São Paulo, Av. Prof Lineu Prestes 580, Bloco 14, 05508-900 São Paulo,  
SP, Brazil.

<sup>b</sup>Food Research Center (FoRC-CEPID), University of São Paulo, Av. Prof. Lineu  
Prestes 580, Bloco 14, 05508-900, São Paulo, SP, Brazil.

<sup>c</sup>Department of Nutrition, University of California Davis, 95616 Davis, CA, USA

\*Corresponding author: [aymoto@usp.br](mailto:aymoto@usp.br)

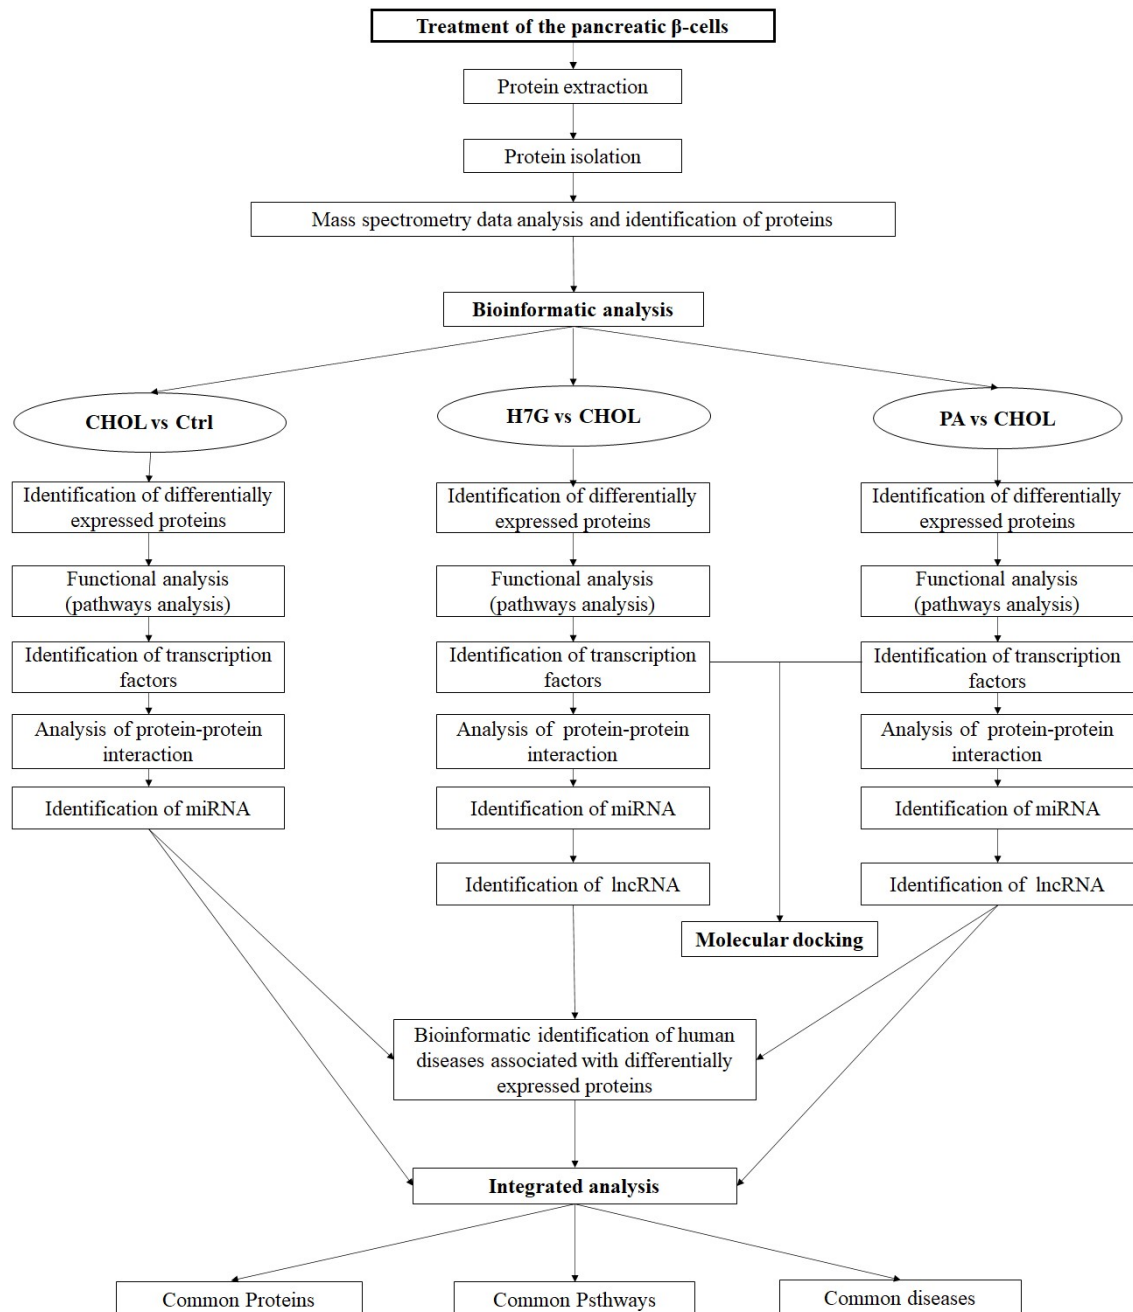

**Figure S1.** Flowchart of the step by step of data analysis.

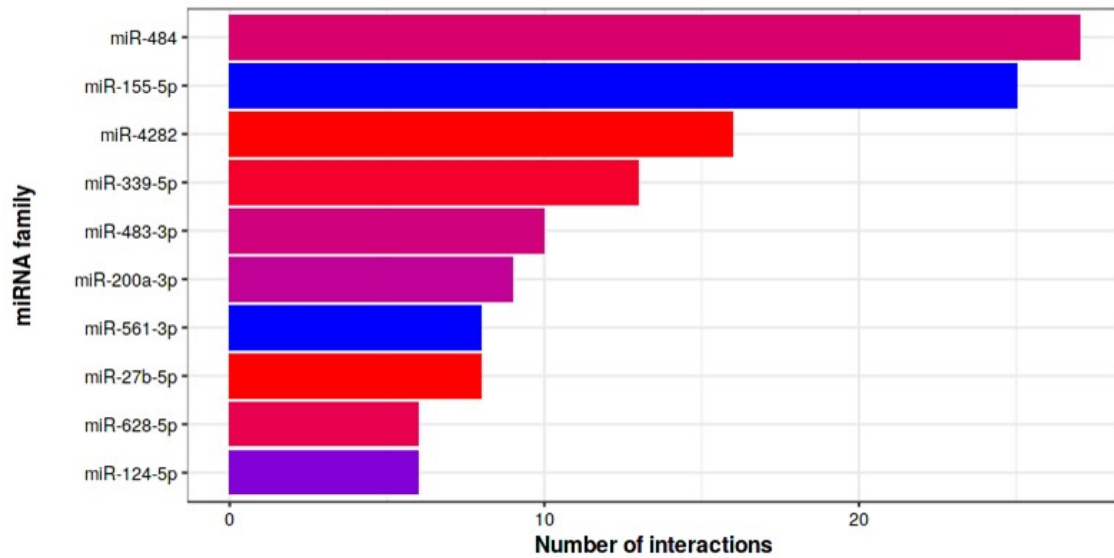

**Figure S2.** Top ten of potential miRNA involved in the regulation of the expression of proteins. The colors are related with numbers of interaction and with the significance ( $p < 0.05$ ).

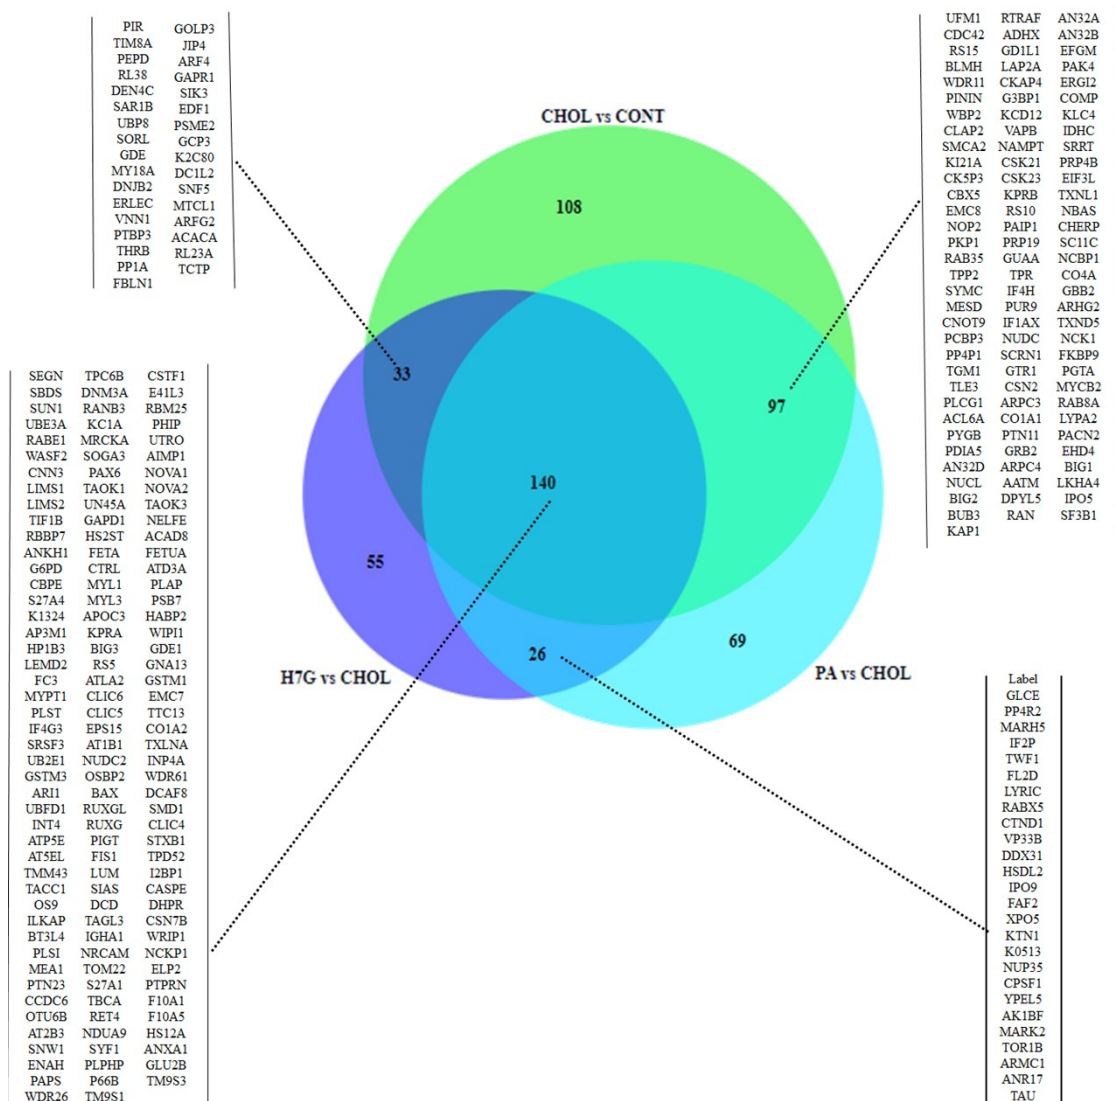

**Figure S3.** Common protein among the CHOL, H7G and PA groups.

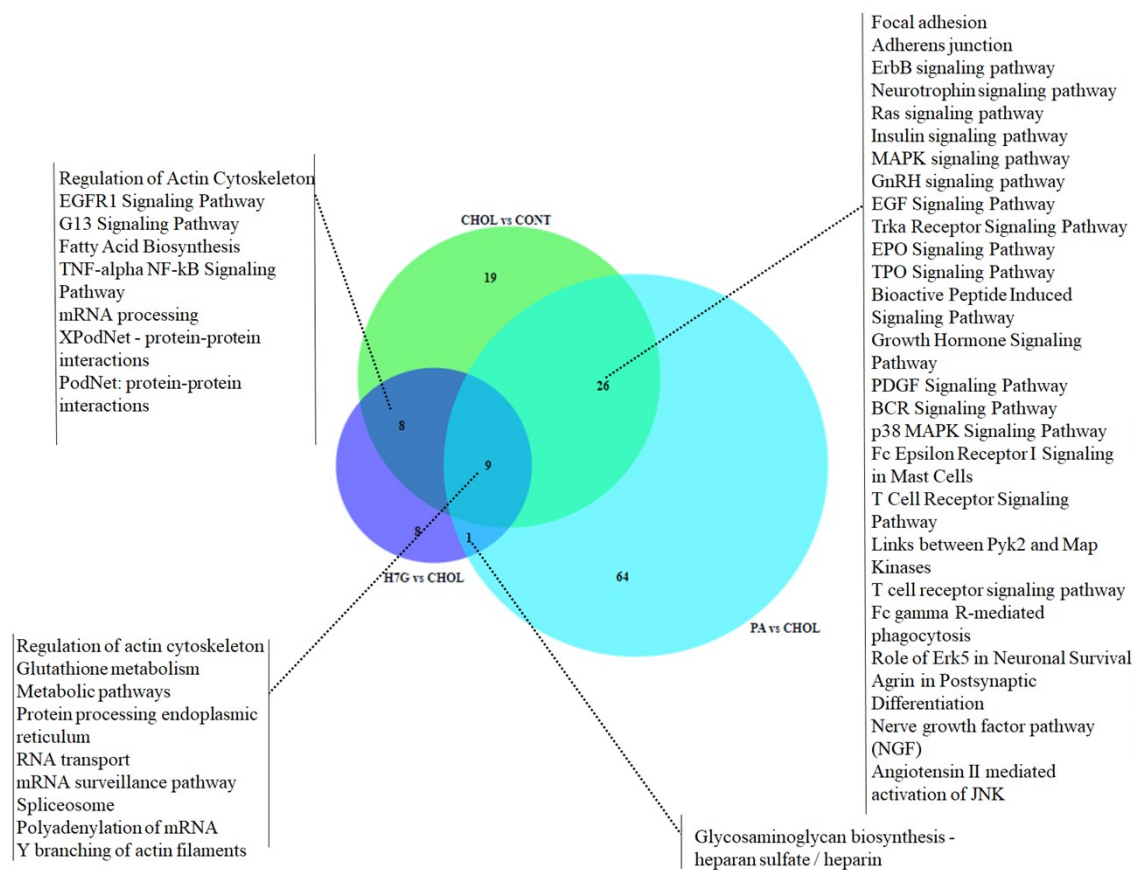

**Figure S4.** Common pathways among the CHOL, H7G and PA groups.
