# Supplementary material for: Citrus flavanone metabolites protect pancreatic β-cells against cholesterol stress through a multi-proteomic mechanism
Source: Royal Society of Chemistry journal article supplement (doi:10.1039/d2fo02479a), 2022-01-01
Supplement: d2fo02479a2.xlsx [file d2fo02479a2.xlsx]

## Sheet: Hesp7G versus Chol
Proteins	Fold Change	log2(FC)
RBM25	2	1
ELP2	2	1
RANB3	0.6	-0.73697
KC1A	0.6	-0.73697
SOGA3	0.6	-0.73697
CLIC4	1.6	0.67807
Label	1.5	0.58496
FETUA	1.5	0.58496
GLCE	1.5	0.58496
DCD	0.66667	-0.58496
PP4R2	1.5	0.58496
PSB7	1.5	0.58496
HABP2	1.5	0.58496
WIPI1	1.5	0.58496
GDE1	1.5	0.58496
DHPR	1.5	0.58496
IF4G3	0.66667	-0.58496
SNF5	1.5	0.58496
TAOK3	1.5	0.58496
GNA13	0.66667	-0.58496
MARH5	0.66667	-0.58496
IF2P	0.66667	-0.58496
GSTM1	1.5	0.58496
RL38	0.66667	-0.58496
EMC7	1.5	0.58496
HSP13	0.66667	-0.58496
TTC13	1.5	0.58496
CO1A2	1.5	0.58496
WDR26	1.5	0.58496
DHX30	0.66667	-0.58496
PCM1	0.66667	-0.58496
TWF1	0.66667	-0.58496
GRPE1	0.66667	-0.58496
GAPR1	1.5	0.58496
WDR61	1.5	0.58496
CILP2	0.66667	-0.58496
SIK3	1.5	0.58496
PAX6	1.5	0.58496
GOLP3	1.4286	0.51457
FL2D	1.4286	0.51457
JIP4	0.7	-0.51457
PLAP	1.375	0.45943
LYRIC	0.75	-0.41504
ACAD8	0.75	-0.41504
UTRO	1.3333	0.41504
K2C8	0.75	-0.41504
MYPT1	1.3333	0.41504
I2BP1	1.3333	0.41504
PLST	0.75	-0.41504
CASPE	1.3333	0.41504
CSTF1	1.3333	0.41504
WASF2	0.75	-0.41504
AIMP1	1.3333	0.41504
PSME2	0.75	-0.41504
CSN7B	1.3333	0.41504
WRIP1	0.75	-0.41504
UBFD1	1.3333	0.41504
NCKP1	1.3333	0.41504
DNM3A	0.75	-0.41504
RABX5	0.75	-0.41504
PHIP	1.3333	0.41504
PTPRN	1.2857	0.36257
F10A1	1.2857	0.36257
F10A5	1.2857	0.36257
LEMD2	1.2857	0.36257
K2C80	0.77778	-0.36257
FC3	1.2857	0.36257
HS12A	1.2857	0.36257
ANXA1	1.2857	0.36257
GLU2B	1.2857	0.36257
OGT1	0.77778	-0.36257
EF1B	0.77778	-0.36257
PFD3	1.2857	0.36257
AP3B2	0.77778	-0.36257
TIAR	1.2857	0.36257
SEGN	1.2857	0.36257
FBLN1	0.77778	-0.36257
SBDS	1.2857	0.36257
SMD1	1.2727	0.34792
H10	1.25	0.32193
CTND1	0.8	-0.32193
NELFE	1.25	0.32193
SYMPK	0.8	-0.32193
CALL5	0.8	-0.32193
STT3B	0.8	-0.32193
DC1L2	0.8	-0.32193
ATD3A	1.25	0.32193
UBE3A	0.8	-0.32193
VP33B	1.25	0.32193
RABE1	0.8	-0.32193
CNN3	1.25	0.32193
TM9S1	0.8	-0.32193
HPLN4	0.8	-0.32193
DDX31	1.25	0.32193
GCP3	1.25	0.32193
E41L3	0.8	-0.32193
LIMS1	0.8	-0.32193
LIMS2	0.8	-0.32193
TPC6B	1.25	0.32193
OS9	0.8	-0.32193
PLSI	0.8	-0.32193
TXLNA	1.25	0.32193
HSDL2	1.25	0.32193
CCDC6	0.8	-0.32193
STXB1	1.2308	0.29956
TPD52	1.2222	0.28951
UN45A	0.81818	-0.28951
P5CR1	0.81818	-0.28951
AP1G1	0.81818	-0.28951
TM9S3	1.2143	0.28011
HS2ST	1.2	0.26303
FETA	1.2	0.26303
CTRL	1.2	0.26303
MYL1	1.2	0.26303
MYL3	1.2	0.26303
IPO9	1.2	0.26303
APOC3	1.2	0.26303
PFD2	0.83333	-0.26303
SRSF3	1.2	0.26303
KPRA	1.2	0.26303
BIG3	1.2	0.26303
FAF2	0.83333	-0.26303
WASC5	0.83333	-0.26303
VAT1	0.83333	-0.26303
RS5	1.2	0.26303
AAK1	0.83333	-0.26303
ACACA	0.83333	-0.26303
ATLA2	1.2	0.26303
XPO5	1.2	0.26303
CLIC6	1.2	0.26303
CLIC5	1.2	0.26303
ZFR	0.83333	-0.26303
EPS15	1.2	0.26303
KTN1	1.2	0.26303
AT1B1	1.2	0.26303
NUDC2	1.2	0.26303
OSBP2	1.2	0.26303
ARF4	0.83333	-0.26303
BAX	1.2	0.26303
RL23A	1.2	0.26303
TCTP	1.2	0.26303
ANK2	0.83333	-0.26303
ERAP1	0.83333	-0.26303
ARFP1	0.83333	-0.26303
RUXGL	1.2	0.26303
RUXG	1.2	0.26303
QCR2	0.83333	-0.26303
TETN	0.83333	-0.26303
FACR1	0.83333	-0.26303
PIGT	1.2	0.26303
CUL3	1.2	0.26303
FIS1	1.2	0.26303
COG4	0.83333	-0.26303
PIR	0.83333	-0.26303
LUM	1.2	0.26303
SUN1	1.2	0.26303
TIM8A	1.2	0.26303
PSMD5	0.83333	-0.26303
PEPD	0.83333	-0.26303
SIAS	1.2	0.26303
TAGL3	1.2	0.26303
IGHA1	1.2	0.26303
NRCAM	1.2	0.26303
CLPT1	0.83333	-0.26303
ZN207	0.83333	-0.26303
TOM22	1.2	0.26303
S27A1	1.2	0.26303
TBCA	1.2	0.26303
RET4	1.2	0.26303
ITA6	0.83333	-0.26303
NDUA9	1.2	0.26303
HEM2	1.2	0.26303
K0513	1.2	0.26303
SYF1	1.2	0.26303
THBG	0.83333	-0.26303
ARGI1	0.83333	-0.26303
PP1A	1.2	0.26303
PLPHP	1.2	0.26303
P66B	1.2	0.26303
NUP35	1.2	0.26303
AT2B3	1.2	0.26303
SNW1	1.2	0.26303
ENAH	1.2	0.26303
PAPS1	1.2	0.26303
UB2E1	1.2	0.26303
GSTM3	1.2	0.26303
GAK	1.2	0.26303
P4R3A	0.83333	-0.26303
ARI1	1.2	0.26303
INT4	1.2	0.26303
CPSF1	1.2	0.26303
HCDH	0.83333	-0.26303
D39U1	0.83333	-0.26303
DEN4C	0.83333	-0.26303
YPEL5	1.2	0.26303
MTCL1	1.2	0.26303
ATP5E	1.2	0.26303
AT5EL	1.2	0.26303
SAR1B	1.2	0.26303
TMM43	1.2	0.26303
UBP8	0.83333	-0.26303
EDEM3	0.83333	-0.26303
SORL	0.83333	-0.26303
GDE	0.83333	-0.26303
AK1BF	1.2	0.26303
MY18A	1.2	0.26303
TACC1	1.2	0.26303
CAPS1	0.83333	-0.26303
GGT7	1.2	0.26303
ILKAP	1.2	0.26303
MBD2	1.2	0.26303
BT3L4	1.2	0.26303
NOVA1	1.2	0.26303
NOVA2	1.2	0.26303
GT251	0.83333	-0.26303
MRCKA	1.2	0.26303
MEA1	1.2	0.26303
MARK2	1.2	0.26303
TOR1B	1.2	0.26303
NIPBL	1.2	0.26303
PTN23	1.2	0.26303
ARMC1	0.83333	-0.26303
TEN4	0.83333	-0.26303
DNJB2	1.2	0.26303
INP4A	0.83333	-0.26303
OTU6B	1.2	0.26303
RRAGC	0.83333	-0.26303
RRAGD	0.83333	-0.26303
ERLEC	0.83333	-0.26303
VNN1	1.2	0.26303
DCAF8	0.83333	-0.26303
TAOK1	1.2	0.26303
ARFG2	1.1818	0.24101
S27A4	0.84615	-0.24101
GAPD1	1.1818	0.24101
EIF3D	0.85	-0.23447
TIF1B	1.1765	0.23447
RBBP7	1.1667	0.22239
EDF1	1.1667	0.22239
ANR17	0.85714	-0.22239
ANKH1	0.85714	-0.22239
TAU	0.85714	-0.22239
PLEC	0.85714	-0.22239
PTBP3	1.1538	0.20645
G6PD	1.1538	0.20645
CBPE	1.1538	0.20645
MAOM	0.86667	-0.20645
THRB	1.1538	0.20645
K1324	1.1538	0.20645
FKBP3	1.1538	0.20645
AP3M1	1.1538	0.20645
KIF11	0.86667	-0.20645
HP1B3	1.1538	0.20645
YES	1.1538	0.20645

## Sheet: PA versus Chol
	Fold Change	log2(FC)
Label	2	1
CSTF1	2	1
AIMP1	2	1
CSN7B	2	1
RBM25	2	1
AN32D	0.5	-1
AN32A	0.5	-1
AN32B	0.5	-1
NCKP1	2	1
UFM1	0.6	-0.73697
UTRO	1.6667	0.73697
I2BP1	1.6667	0.73697
SUN1	0.6	-0.73697
E41L3	0.6	-0.73697
ELP2	1.6667	0.73697
PHIP	1.6667	0.73697
LYRIC	1.5	0.58496
ACAD8	1.5	0.58496
FETUA	1.5	0.58496
PLAP	1.5	0.58496
PP4R2	1.5	0.58496
PSB7	1.5	0.58496
HABP2	1.5	0.58496
ISCA2	0.66667	-0.58496
COEA1	0.66667	-0.58496
WIPI1	1.5	0.58496
GDE1	1.5	0.58496
TAOK3	1.5	0.58496
MARH5	0.66667	-0.58496
DDX31	1.5	0.58496
GSTM1	1.5	0.58496
TTC13	1.5	0.58496
WDR26	1.5	0.58496
DNM3A	1.5	0.58496
WDR61	1.5	0.58496
DCAF8	0.66667	-0.58496
SMD1	1.4545	0.54057
PSME3	0.71429	-0.48543
STXB1	1.3846	0.46949
RAGP1	1.3636	0.44746
PKP1	1.3333	0.41504
TPP2	1.3333	0.41504
DHPR	1.3333	0.41504
WBP2	1.3333	0.41504
UBFD1	1.3333	0.41504
CLAP2	0.75	-0.41504
RABX5	0.75	-0.41504
PTPRN	1.2857	0.36257
F10A1	1.2857	0.36257
F10A5	1.2857	0.36257
MYO1C	0.77778	-0.36257
HS12A	1.2857	0.36257
ANXA1	1.2857	0.36257
CHERP	1.2857	0.36257
TM9S3	1.2857	0.36257
GNAQ	0.77778	-0.36257
CHD4	1.2857	0.36257
SEGN	1.2857	0.36257
IF4G3	0.77778	-0.36257
TAU	1.2857	0.36257
NCBP1	1.2857	0.36257
GAPD1	1.2727	0.34792
CDC42	1.25	0.32193
CBX5	0.8	-0.32193
NELFE	1.25	0.32193
GLCE	1.25	0.32193
ATD3A	1.25	0.32193
VP33B	1.25	0.32193
RABE1	0.8	-0.32193
WASF2	1.25	0.32193
CNN3	1.25	0.32193
WRIP1	1.25	0.32193
CO1A2	1.25	0.32193
AK1BF	0.8	-0.32193
TPC6B	1.25	0.32193
TXLNA	1.25	0.32193
HSDL2	1.25	0.32193
PAX6	1.25	0.32193
TIF1B	1.2353	0.30485
HS2ST	1.2	0.26303
FETA	1.2	0.26303
CTRL	1.2	0.26303
MYL1	1.2	0.26303
MYL3	1.2	0.26303
IPO9	1.2	0.26303
APOC3	1.2	0.26303
KAP1	1.2	0.26303
PTPRF	0.83333	-0.26303
SRSF3	1.2	0.26303
SYMC	1.2	0.26303
KPRA	1.2	0.26303
EWS	0.83333	-0.26303
BIG3	1.2	0.26303
FAF2	0.83333	-0.26303
RS5	1.2	0.26303
NDRG1	0.83333	-0.26303
ATLA2	1.2	0.26303
XPO5	1.2	0.26303
CLIC6	1.2	0.26303
CLIC5	1.2	0.26303
EPS15	1.2	0.26303
KTN1	1.2	0.26303
AT1B1	1.2	0.26303
RS15	0.83333	-0.26303
NUDC2	1.2	0.26303
MESD	1.2	0.26303
OSBP2	1.2	0.26303
BAX	1.2	0.26303
NUD11	0.83333	-0.26303
RUXGL	1.2	0.26303
RUXG	1.2	0.26303
TRRAP	1.2	0.26303
CNOT9	0.83333	-0.26303
PCBP3	1.2	0.26303
PIGT	1.2	0.26303
PP4P1	1.2	0.26303
EMC8	1.2	0.26303
FIS1	1.2	0.26303
LUM	1.2	0.26303
UBE3A	1.2	0.26303
RANG	0.83333	-0.26303
SIAS	1.2	0.26303
TGM1	0.83333	-0.26303
DCD	0.83333	-0.26303
TAGL3	1.2	0.26303
VRK1	0.83333	-0.26303
IGHA1	1.2	0.26303
TLE3	1.2	0.26303
PLCG1	1.2	0.26303
RPB1	0.83333	-0.26303
NRCAM	1.2	0.26303
ACL6A	1.2	0.26303
FRDA	0.83333	-0.26303
CLIC4	1.2	0.26303
TOM22	1.2	0.26303
S27A1	1.2	0.26303
CLAP1	0.83333	-0.26303
TBCA	1.2	0.26303
CREB1	0.83333	-0.26303
RET4	1.2	0.26303
NDUA9	1.2	0.26303
PTN6	1.2	0.26303
PYGB	1.2	0.26303
K0513	1.2	0.26303
SYF1	1.2	0.26303
PDIA5	1.2	0.26303
PLPHP	1.2	0.26303
GNA13	0.83333	-0.26303
P66B	1.2	0.26303
NUP35	1.2	0.26303
TM9S1	1.2	0.26303
EM55	1.2	0.26303
AT2B3	1.2	0.26303
SNW1	1.2	0.26303
ENAH	1.2	0.26303
NOP2	1.2	0.26303
IF2P	0.83333	-0.26303
PAPS1	1.2	0.26303
UB2E1	1.2	0.26303
GSTM3	1.2	0.26303
ARI1	1.2	0.26303
INT4	1.2	0.26303
CPSF1	1.2	0.26303
STX6	0.83333	-0.26303
EFGM	1.2	0.26303
YPEL5	1.2	0.26303
ARC1A	0.83333	-0.26303
PAK4	0.83333	-0.26303
ATP5E	1.2	0.26303
AT5EL	1.2	0.26303
TMM43	1.2	0.26303
LIMS1	1.2	0.26303
LIMS2	1.2	0.26303
TACC1	1.2	0.26303
MPPA	1.2	0.26303
RANB3	1.2	0.26303
OS9	1.2	0.26303
KC1A	1.2	0.26303
ERGI2	1.2	0.26303
KI13B	1.2	0.26303
ILKAP	1.2	0.26303
BT3L4	1.2	0.26303
COMP	0.83333	-0.26303
NOLC1	1.2	0.26303
NOVA1	1.2	0.26303
NOVA2	1.2	0.26303
TWF1	0.83333	-0.26303
PLSI	1.2	0.26303
MRCKA	1.2	0.26303
MEA1	1.2	0.26303
MARK2	1.2	0.26303
TOR1B	1.2	0.26303
PTN23	1.2	0.26303
ARMC1	0.83333	-0.26303
CCDC6	1.2	0.26303
INP4A	0.83333	-0.26303
OTU6B	1.2	0.26303
BRE1B	1.2	0.26303
SOGA3	1.2	0.26303
KLC4	0.83333	-0.26303
TAOK1	1.2	0.26303
RBBP7	1.1667	0.22239
SMRC2	1.1667	0.22239
FC3	0.85714	-0.22239
CASPE	1.1667	0.22239
ANR17	0.85714	-0.22239
ANKH1	0.85714	-0.22239
EMC7	1.1667	0.22239
SBDS	0.85714	-0.22239
EIF3L	1.1538	0.20645
TXNL1	1.1538	0.20645
G6PD	1.1538	0.20645
CBPE	1.1538	0.20645
S27A4	1.1538	0.20645
K1324	1.1538	0.20645
NBAS	1.1538	0.20645
AP3M1	1.1538	0.20645
HP1B3	1.1538	0.20645
NEC1	1.1429	0.19265
LEMD2	1.1429	0.19265
GLU2B	1.1429	0.19265
ARL1	0.875	-0.19265
GALT1	0.875	-0.19265
PFD3	1.1429	0.19265
TIAR	1.1429	0.19265
PRP4B	1.1429	0.19265
SC11C	1.1429	0.19265
FL2D	1.1429	0.19265
SMCA2	0.875	-0.19265
2019-09-11	0.88235	-0.18057
CO4A	0.88235	-0.18057
SRRT	1.1304	0.17688
GBB2	1.125	0.16993
RTRAF	1.125	0.16993
ADHX	1.125	0.16993
HNRH3	0.88889	-0.16993
GD1L1	1.125	0.16993
API5	1.125	0.16993
VAMP2	0.88889	-0.16993
L7N2F9	0.88889	-0.16993
ECE1	1.125	0.16993
LAP2A	1.125	0.16993
VAMP3	0.88889	-0.16993
CKAP4	1.125	0.16993
PUR6	1.125	0.16993
WDR11	1.125	0.16993
G3BP1	1.125	0.16993
RL15	1.125	0.16993
KCD12	1.125	0.16993
VAPB	1.125	0.16993
EF1G	0.88889	-0.16993
2019-09-15	1.125	0.16993
NAMPT	1.125	0.16993
CSK21	1.125	0.16993
CSK23	1.125	0.16993
KPRB	1.125	0.16993
RS10	1.125	0.16993
PAIP1	1.125	0.16993
ARP2	1.125	0.16993
PLXB2	0.88889	-0.16993
PRP19	1.125	0.16993
GUAA	1.125	0.16993
ARLY	0.88889	-0.16993
CTNA2	0.88889	-0.16993
PUR2	1.125	0.16993
IF4H	1.125	0.16993
PUR9	1.125	0.16993
IF1AX	1.125	0.16993
BAG2	0.88889	-0.16993
NUDC	1.125	0.16993
TDRKH	0.88889	-0.16993
FLOT2	1.125	0.16993
GLYC	1.125	0.16993
SCRN1	1.125	0.16993
GTR1	1.125	0.16993
BLMH	0.88889	-0.16993
PLST	1.125	0.16993
PGM2	1.125	0.16993
CSN2	0.88889	-0.16993
KI21A	0.88889	-0.16993
ARPC3	1.125	0.16993
CHIP	1.125	0.16993
SC23A	1.125	0.16993
SRPK2	0.88889	-0.16993
CO1A1	0.88889	-0.16993
PTN11	1.125	0.16993
ODBA	0.88889	-0.16993
PININ	1.125	0.16993
TPPC8	1.125	0.16993
WDR1	1.125	0.16993
KRT36	0.88889	-0.16993
GRB2	0.88889	-0.16993
ARPC4	1.125	0.16993
ERN1	1.125	0.16993
TXND5	1.125	0.16993
NCK1	1.125	0.16993
FKBP9	1.125	0.16993
PGTA	1.125	0.16993
MYCB2	1.125	0.16993
RAB8A	1.125	0.16993
CK5P3	0.88889	-0.16993
ELP3	1.125	0.16993
LYPA2	1.125	0.16993
PACN2	0.88889	-0.16993
EHD4	1.125	0.16993
BIG1	1.125	0.16993
LKHA4	1.1176	0.16046
IDHC	1.1176	0.16046
PGM1	1.1154	0.15754
2019-09-07	1.1154	0.15754
IPO5	1.1111	0.152
AATM	1.1111	0.152
SMCA5	1.1111	0.152
UBR4	1.1111	0.152
CTND1	0.9	-0.152
TPR	1.1111	0.152
TPD52	1.1111	0.152
DPYL5	1.1111	0.152
MYPT1	1.1111	0.152
TCRG1	0.9	-0.152
RAB35	1.1111	0.152
ARHG2	0.9	-0.152
RAN	1.1053	0.14439
SF3B1	1.1053	0.14439
NUCL	1.1053	0.14439
PSMD1	1.1053	0.14439
BIG2	1.1053	0.14439
BUB3	1.1053	0.14439
VIGLN	1.1034	0.14202
EIF3J	0.90909	-0.1375
SCFD1	0.90909	-0.1375
UN45A	0.90909	-0.1375

## Sheet: Chol versus Glucose
Proteins	Fold Change	log2(FC)
Label	2	1
GIT1	0.5	-1
CSTF1	0.5	-1
E41L3	2	1
RBM25	0.5	-1
PHIP	0.5	-1
GOLP3	0.58333	-0.77761
UFM1	1.6667	0.73697
UTRO	0.6	-0.73697
BRCC3	1.6667	0.73697
AIMP1	0.6	-0.73697
JIP4	1.6667	0.73697
NOVA1	1.6667	0.73697
NOVA2	1.6667	0.73697
TAOK3	1.6	0.67807
CDC42	0.66667	-0.58496
AFAD	1.5	0.58496
NELFE	0.66667	-0.58496
RS15	1.5	0.58496
ACAD8	0.66667	-0.58496
ARF4	1.5	0.58496
FETUA	0.66667	-0.58496
ATD3A	0.66667	-0.58496
PLAP	0.66667	-0.58496
ZN326	1.5	0.58496
BLMH	1.5	0.58496
PSB7	0.66667	-0.58496
HABP2	0.66667	-0.58496
WIPI1	0.66667	-0.58496
GDE1	0.66667	-0.58496
GNA13	1.5	0.58496
GSTM1	0.66667	-0.58496
EMC7	0.66667	-0.58496
H2AW	1.5	0.58496
TTC13	0.66667	-0.58496
CO1A2	0.66667	-0.58496
NUDT3	0.66667	-0.58496
TXLNA	0.66667	-0.58496
INP4A	1.5	0.58496
GAPR1	0.66667	-0.58496
WDR61	0.66667	-0.58496
SIK3	0.66667	-0.58496
DCAF8	1.5	0.58496
SMD1	0.6875	-0.54057
CLIC4	0.71429	-0.48543
STXB1	0.72222	-0.46949
SEC63	1.3636	0.44746
WDR11	1.3333	0.41504
TPD52	0.75	-0.41504
EDF1	0.75	-0.41504
I2BP1	0.75	-0.41504
VAC14	1.3333	0.41504
CASPE	0.75	-0.41504
MPP2	1.3333	0.41504
PININ	1.3333	0.41504
DHPR	0.75	-0.41504
WBP2	0.75	-0.41504
PSME2	1.3333	0.41504
ADH1G	1.3333	0.41504
GCP3	1.3333	0.41504
CSN7B	0.75	-0.41504
WRIP1	1.3333	0.41504
CLAP2	1.3333	0.41504
NCKP1	0.75	-0.41504
ELP2	0.75	-0.41504
SMCA2	1.3333	0.41504
PTPRN	0.77778	-0.36257
F10A1	0.77778	-0.36257
F10A5	0.77778	-0.36257
ZO1	1.2857	0.36257
K2C80	1.2857	0.36257
HS12A	0.77778	-0.36257
ANXA1	0.77778	-0.36257
GLU2B	0.77778	-0.36257
TM9S3	0.77778	-0.36257
KI21A	1.2857	0.36257
AGAP1	1.2857	0.36257
PFD3	0.77778	-0.36257
TIAR	0.77778	-0.36257
SEGN	0.77778	-0.36257
CK5P3	1.2857	0.36257
SBDS	0.77778	-0.36257
CBX5	1.25	0.32193
DC1L2	1.25	0.32193
EMC8	1.25	0.32193
SUN1	1.25	0.32193
UBE3A	1.25	0.32193
RABE1	1.25	0.32193
TIPRL	0.8	-0.32193
SNF5	0.8	-0.32193
WASF2	0.8	-0.32193
CNN3	0.8	-0.32193
NOP2	1.25	0.32193
MTCL1	1.25	0.32193
LIMS1	1.25	0.32193
LIMS2	1.25	0.32193
WDR26	0.8	-0.32193
ZDHC6	0.8	-0.32193
TPC6B	0.8	-0.32193
DNM3A	0.8	-0.32193
RANB3	1.25	0.32193
KC1A	1.25	0.32193
MRCKA	1.25	0.32193
SOGA3	1.25	0.32193
PAX6	0.8	-0.32193
TAOK1	1.25	0.32193
ARFG2	1.2222	0.28951
PKP1	0.81818	-0.28951
UN45A	1.2222	0.28951
RAB35	0.81818	-0.28951
TPP2	0.81818	-0.28951
EGFR	0.81818	-0.28951
GAPD1	1.2222	0.28951
HS2ST	0.83333	-0.26303
DYL1	1.2	0.26303
GLSK	1.2	0.26303
FETA	0.83333	-0.26303
CTRL	0.83333	-0.26303
MYL1	0.83333	-0.26303
MYL3	0.83333	-0.26303
SNX6	1.2	0.26303
APOC3	0.83333	-0.26303
SYMC	0.83333	-0.26303
KPRA	0.83333	-0.26303
BIG3	0.83333	-0.26303
RS5	0.83333	-0.26303
DAD1	1.2	0.26303
ACACA	1.2	0.26303
ATLA2	0.83333	-0.26303
CLIC6	0.83333	-0.26303
CLIC5	0.83333	-0.26303
EPS15	0.83333	-0.26303
AT1B1	0.83333	-0.26303
NUDC2	0.83333	-0.26303
MESD	0.83333	-0.26303
SYT2	1.2	0.26303
OSBP2	0.83333	-0.26303
BAX	0.83333	-0.26303
RL23A	0.83333	-0.26303
TIM13	1.2	0.26303
TCTP	0.83333	-0.26303
RUXGL	0.83333	-0.26303
RUXG	0.83333	-0.26303
CSN6	0.83333	-0.26303
GBB1	1.2	0.26303
UBP7	1.2	0.26303
CNOT9	1.2	0.26303
PCBP3	0.83333	-0.26303
PIGT	0.83333	-0.26303
BABA2	1.2	0.26303
ATG7	1.2	0.26303
PP4P1	0.83333	-0.26303
FIS1	0.83333	-0.26303
PEDF	0.83333	-0.26303
PIR	1.2	0.26303
LUM	0.83333	-0.26303
TIM8A	0.83333	-0.26303
PEPD	1.2	0.26303
FA49B	1.2	0.26303
SIAS	0.83333	-0.26303
TGM1	1.2	0.26303
DCD	1.2	0.26303
TAGL3	0.83333	-0.26303
IGHA1	0.83333	-0.26303
TLE3	0.83333	-0.26303
PLCG1	0.83333	-0.26303
NRCAM	0.83333	-0.26303
ACL6A	0.83333	-0.26303
TOM22	0.83333	-0.26303
S27A1	0.83333	-0.26303
TBCA	0.83333	-0.26303
RGPD3	1.2	0.26303
RGPD4	1.2	0.26303
SUV3	1.2	0.26303
RET4	0.83333	-0.26303
NDUA9	0.83333	-0.26303
PYGB	0.83333	-0.26303
SYF1	0.83333	-0.26303
GOGA3	1.2	0.26303
PDIA5	0.83333	-0.26303
MTAP2	1.2	0.26303
PLPHP	0.83333	-0.26303
P66B	0.83333	-0.26303
SMU1	1.2	0.26303
TM9S1	0.83333	-0.26303
AT2B3	0.83333	-0.26303
SNW1	0.83333	-0.26303
ENAH	0.83333	-0.26303
TB182	1.2	0.26303
DACH1	1.2	0.26303
PAPS1	0.83333	-0.26303
UB2E1	0.83333	-0.26303
GSTM3	0.83333	-0.26303
ARI1	0.83333	-0.26303
RL38	1.2	0.26303
UBFD1	1.2	0.26303
KTHY	1.2	0.26303
INT4	0.83333	-0.26303
SKIV2	1.2	0.26303
AN32D	1.2	0.26303
AN32A	1.2	0.26303
AN32B	1.2	0.26303
EFGM	0.83333	-0.26303
GOGB1	1.2	0.26303
DEN4C	1.2	0.26303
PAK4	1.2	0.26303
ATP5E	0.83333	-0.26303
AT5EL	0.83333	-0.26303
SAR1B	0.83333	-0.26303
MBLC2	1.2	0.26303
TMM43	0.83333	-0.26303
UBP8	1.2	0.26303
SORL	1.2	0.26303
GDE	1.2	0.26303
MY18A	0.83333	-0.26303
TACC1	0.83333	-0.26303
OS9	0.83333	-0.26303
ERGI2	0.83333	-0.26303
ILKAP	0.83333	-0.26303
BT3L4	0.83333	-0.26303
COMP	1.2	0.26303
BMP2K	1.2	0.26303
PLSI	0.83333	-0.26303
MEA1	0.83333	-0.26303
RBM12	1.2	0.26303
PTN23	0.83333	-0.26303
CCDC6	0.83333	-0.26303
DNJB2	0.83333	-0.26303
OTU6B	0.83333	-0.26303
CBR3	1.2	0.26303
ERLEC	1.2	0.26303
VNN1	0.83333	-0.26303
2A5D	1.2	0.26303
KLC4	1.2	0.26303
HMGB1	1.1818	0.24101
TIF1B	0.85	-0.23447
CALR	1.1765	0.23447
IDHC	0.85	-0.23447
SRRT	0.85185	-0.23133
RBBP7	0.85714	-0.22239
COR1C	0.85714	-0.22239
APOB	1.1667	0.22239
PRP4B	1.1667	0.22239
ANKH1	1.1667	0.22239
PTBP3	0.86667	-0.20645
2019-09-02	1.1538	0.20645
EIF3L	0.86667	-0.20645
POTEF	1.1538	0.20645
TXNL1	0.86667	-0.20645
G6PD	0.86667	-0.20645
CBPE	0.86667	-0.20645
THRB	0.86667	-0.20645
S27A4	0.86667	-0.20645
K1324	0.86667	-0.20645
NBAS	0.86667	-0.20645
AP3M1	0.86667	-0.20645
HP1B3	0.86667	-0.20645
LEMD2	0.875	-0.19265
FC3	0.875	-0.19265
CHERP	0.875	-0.19265
BRE1A	1.1429	0.19265
ACSL3	1.1429	0.19265
SC11C	0.875	-0.19265
SC24A	1.1429	0.19265
NCBP1	0.875	-0.19265
CO4A	1.1333	0.18057
PP1A	0.88235	-0.18057
GBB2	0.88889	-0.16993
RTRAF	0.88889	-0.16993
ADHX	0.88889	-0.16993
NPM	0.88889	-0.16993
EIF1B	1.125	0.16993
EIF1	1.125	0.16993
TRA2B	1.125	0.16993
GD1L1	0.88889	-0.16993
IF4G2	1.125	0.16993
LAP2A	0.88889	-0.16993
SDHB	1.125	0.16993
OXSR1	1.125	0.16993
CKAP4	0.88889	-0.16993
G3BP1	0.88889	-0.16993
SH3L1	1.125	0.16993
KCD12	0.88889	-0.16993
VAPB	0.88889	-0.16993
NAMPT	0.88889	-0.16993
CSK21	0.88889	-0.16993
CSK23	0.88889	-0.16993
KPRB	0.88889	-0.16993
VPS52	1.125	0.16993
RS10	0.88889	-0.16993
PAIP1	0.88889	-0.16993
STX7	1.125	0.16993
PRP19	0.88889	-0.16993
GUAA	0.88889	-0.16993
GLYR1	1.125	0.16993
STK24	1.125	0.16993
YMEL1	1.125	0.16993
TPR	1.125	0.16993
ERP44	0.88889	-0.16993
IF4H	0.88889	-0.16993
VPS51	1.125	0.16993
S10A8	0.88889	-0.16993
PUR9	0.88889	-0.16993
NOMO3	1.125	0.16993
NOMO1	1.125	0.16993
NOMO2	1.125	0.16993
IF1AX	0.88889	-0.16993
MYPT1	1.125	0.16993
STXB5	1.125	0.16993
STA10	1.125	0.16993
UBP47	1.125	0.16993
NUDC	0.88889	-0.16993
STK25	1.125	0.16993
STK26	1.125	0.16993
SCRN1	0.88889	-0.16993
SPT6H	1.125	0.16993
GTR1	0.88889	-0.16993
PLST	0.88889	-0.16993
CSN2	1.125	0.16993
CNOT1	0.88889	-0.16993
PYRG2	1.125	0.16993
ARPC3	0.88889	-0.16993
CSTF2	1.125	0.16993
CO1A1	1.125	0.16993
FEN1	0.88889	-0.16993
PTN11	0.88889	-0.16993
PHS	1.125	0.16993
RRAGA	1.125	0.16993
GRB2	1.125	0.16993
UB2L3	0.88889	-0.16993
IF4G3	1.125	0.16993
ARPC4	0.88889	-0.16993
MACF1	1.125	0.16993
TXND5	0.88889	-0.16993
RAB4B	1.125	0.16993
ARAF	0.88889	-0.16993
PELO	0.88889	-0.16993
NCK1	0.88889	-0.16993
FBLN1	1.125	0.16993
NU160	1.125	0.16993
MPP6	1.125	0.16993
FKBP9	0.88889	-0.16993
PGTA	0.88889	-0.16993
CUL4B	0.88889	-0.16993
MYCB2	0.88889	-0.16993
XPO7	1.125	0.16993
RAB8A	0.88889	-0.16993
EI2BG	0.88889	-0.16993
CELF2	1.125	0.16993
LYPA2	0.88889	-0.16993
PACN2	1.125	0.16993
KCY	0.88889	-0.16993
EHD4	0.88889	-0.16993
BIG1	0.88889	-0.16993
LKHA4	0.89474	-0.16046
IPO5	0.9	-0.152
AATM	0.9	-0.152
PPM1G	1.1111	0.152
DPYL5	0.9	-0.152
RAN	0.90476	-0.14439
SF3B1	0.90476	-0.14439
PGK1	0.90476	-0.14439
LIS1	0.90476	-0.14439
TCEA1	0.90476	-0.14439
FUS	0.90476	-0.14439
PP2AA	0.90476	-0.14439
C1TC	0.90476	-0.14439
NUCL	0.90476	-0.14439
BIG2	0.90476	-0.14439
BUB3	0.90476	-0.14439
BIP	0.90909	-0.1375
TOP2A	0.90909	-0.1375
KAP1	0.90909	-0.1375
MCM5	0.90909	-0.1375
SRSF3	0.90909	-0.1375
HNRPR	0.90909	-0.1375
GARS	0.90909	-0.1375
ARHG2	0.90909	-0.1375
