# Supplementary material for: Citrus flavanone metabolites protect pancreatic β-cells against cholesterol stress through a multi-proteomic mechanism
Source: Royal Society of Chemistry journal article supplement (doi:10.1039/d2fo02479a), 2022-01-01
Supplement: d2fo02479a3.xlsx [file d2fo02479a3.xlsx]

## Sheet: Proteins quantitie each group
Sample	Ctrl1	Ctrl2	Ctrl3	CHOL1	CHOL2	CHOL3	CHOL+H7G1	CHOL+H7G2	CHOL+H7G3	CHOL+PA1	CHOL+PA2	CHOL+PA3
PHB	109972900	92758830	119123200	208623700	149523500	133588700	163251500	142929800	85469350	251863900	263262000	218908900
BIP	6252887000	3921640000	5323558000	5759219000	4016277000	4126959000	3021308000	4032431000	2546501000	5191968000	5308581000	4892044000
CLH1	647247600	720450300	874552400	830438900	449036600	621116200	1172201000	812512600	1313800000	531849900	738038800	311513500
ENPL	4994237000	4999109000	6312334000	5528060000	4042645000	3604062000	4684136000	4755535000	4284977000	3727329000	5129121000	3769978000
PSB1	61608740	38317940	44704970	70762080	35676680	35606780	27840340	21729510	18303680	29047260	52727460	37445370
ENOA	1129636000	1203421000	1581031000	773904100	700355900	747282200	657390500	664849600	541561000	761294500	1116420000	640454100
IQGA1	142415000	154731300	187259900	173833000	104748600	127081700	210438300	159694500	171241600	118827700	157422300	81314800
EF1A1	4690178000	4813773000	6195646000	3278683000	2506573000	2586077000	3928061000	3739701000	2624528000	2379647000	3009700000	1978674000
EF1A3	4690178000	4813773000	6195646000	3278683000	2506573000	2586077000	3928061000	3739701000	2624528000	2379647000	3009700000	1978674000
OAT	23338550	21344970	28612060	25005550	21325910	29003160	30329440	20766040	17850710	27172060	35023740	17979370
EIF3D	29556670	28667780	29260450	37453840	26118020	20380490	30787760	27027570	23571040	23701660	31779340	17194700
TERA	699229500	868500900	1060084000	946627500	624565500	618520600	813146200	808758400	677877200	514802200	775620700	517829400
PURA	17900430	17657400	22919930	9424999	20445930	18214950	10490800	13448480	8330160	31483680	35330760	23872440
GMDS	7653887	12452320	16173610	10979530	9872003	10755660	12012860	8216984	11950420	7394810	12245230	5211547
RL3	62110250	60878960	79961280	68266110	46642750	52335310	72539610	70360300	62302650	55474500	69832190	42942220
PTBP3	31423280	44981530	65188620	16626030	26791240	41922940	25904480	23426250	27723840	42777240	27282490	30810650
ATPB	1274866000	1387101000	1719307000	1357433000	1458263000	1569663000	1767464000	1670260000	1650727000	1579167000	1846320000	1620348000
RSSA	606487200	665944000	906942200	479015300	443953000	407146500	437826600	381352400	313035100	502613200	679371800	445186900
HNRPF	36629410	38650010	54151640	131348900	28146580	30430950	28570720	24564550	16558390	34349210	50271090	27138550
IDHP	222176300	179848400	230306700	287259800	248144600	201477600	254192000	220676800	195559000	215323700	274419900	177474500
DPP3	12887790	15757350	20889570	11768730	10845710	9349605	12204990	7553995	12136050	10880450	18098530	7665510
PTBP1	43793430	55762920	76622450	27546040	29822070	50197180	46868990	44788740	35901990	44164070	49461120	27862320
SEPT2	10153530	12458130	17194260	8233727	8432618	10870750	12120040	8485353	10192970	10696030	16838530	7119593
RAB1A	352284900	388962400	444988500	239442300	307606900	293008200	390284300	264395800	326156300	322969100	379499500	234349700
CALM1	18574290	19488730	14892710	18512320	17160010	23636430	9265246	12725290	1023712	21669400	25569740	26248970
CALM2	18574290	19488730	14892710	18512320	17160010	23636430	9265246	12725290	1023712	21669400	25569740	26248970
CALM3	18574290	19488730	14892710	18512320	17160010	23636430	9265246	12725290	1023712	21669400	25569740	26248970
KAP0	119729500	151267500	160704500	126476500	107687100	148732300	116857500	119533600	106402300	130095000	184297800	105756500
ENOG	275218900	275355500	299320300	170855100	175725200	186676000	156720800	174056500	117726000	174175000	283974000	157373200
EF2	1160619000	998553900	1221099000	1188170000	587372000	614216500	835109400	712505100	645756900	584436000	826053900	492057300
PRS4	81498570	73630750	90849400	95756610	83871520	58578000	84426420	100707200	63280930	80487570	100533900	57666470
PCKGM	99706180	65247270	92615950	156046300	114950200	97106420	126472000	132662900	93470180	135196100	144437000	106885400
DYHC1	386265900	429269000	567579100	637024700	347954200	398517700	801780700	514589700	780541500	368013400	557477400	227421000
PAIRB	31008910	19217550	20999700	35844920	10204570	16287210	20807510	24153220	9987513	10485060	14612110	17978550
PGAM1	409377900	406993700	592693300	188587400	307218100	290272400	228207400	259456400	155339600	315730300	426822300	281262000
CCD47	10170010	9272533	11856990	8723706	9699603	10648930	11063630	10233000	6381553	10506410	12614720	7962486
SC22B	70450360	43580650	56035300	76142070	45250750	68190970	31355390	45126020	27533490	55267310	89257060	59260350
VDAC1	275062400	243512000	294355400	292945800	247624200	355442100	337944100	273851600	206727000	341498700	402806800	311983100
SOD2	15309759	14061074	15549043	21310050	212139300	20960980	47904464	54812980	66752105	72333691	92378120	92989210
TBB6	1058083000	1040510000	1297541000	686980800	579355600	846543900	847779200	658799500	537330800	736696500	922008700	596973700
SND1	254032400	249868100	309200400	290816000	147872500	199483800	278010600	273253900	306350400	160945700	227617900	137238500
HS2ST	2128766	1426592	1738619	1213995	2263749	819133	1142753	1634257	207791,3	888018,4	2076648	1382401
PDIA6	407133100	456461100	556912100	234280300	317993000	397182800	270967700	245384300	220538300	414562400	467543200	295174200
RS23	11370000	14469830	22320010	33679100	15338300	11484330	16466560	15812550	17653890	15287360	19015120	16091690
HNRPL	55623620	37515160	51125290	73770100	24946270	44396220	40662300	40313560	42487350	46963510	48936390	34492220
ANXA6	265468000	234640700	272492900	193421500	212011700	250897400	173494400	184553300	128175300	199355500	242313400	199860000
MAP1B	121290000	105082200	149789000	157684600	68971060	94197950	115409000	136478500	157022900	74372240	131022800	73864840
RAN	332508600	344676500	447524600	311892700	272350500	248983500	300608700	258678700	252764300	265190700	375967700	241959300
PTN	15824560	13792310	14706170	7099718	12659220	24374770	7721056	13493720	3781515	25245810	19358110	23248320
PAK2	9874301	2984183	4606348	8686154	2449743	3593516	3149931	3232377	2284127	4271125	4986484	4536756
GBB2	50346650	37121690	37172550	58026020	42875790	34830120	42376980	29885830	35442570	51385400	63608260	34577230
DJB11	95740420	85250690	78919160	53908240	93758800	100160200	76794010	80555470	44751870	65389840	97396960	73867760
RL10A	156411300	134832900	211972600	189731400	110892200	126422600	119781300	153629600	88793160	174507700	244425400	159304000
MCM2	145680900	126195500	175882300	174418400	115650500	113837400	146133300	135173000	171740500	131016100	194361200	101742100
PYR1	273352900	306074000	383610900	422809200	269180300	303587300	549976400	382012900	555369700	293610500	387912400	185324900
PGM1	49752130	50720550	67861520	33579960	35823790	33469090	40835530	34739610	39246510	27789890	50217130	15838840
DYL1	16059670	14197910	21492050	746018,9	347599,8	13713740	11188730	7062594	6110873	13539800	9828224	509107,5
RTRAF	5649827	7153804	7040945	3089273	4621703	6285969	3189423	2789805	1973903	6544292	8946310	4086558
PSA4	63205660	72090530	87605830	53745650	65139320	50071180	54381090	50111110	39615840	50842490	75447450	44787850
RL5	46390350	53691150	74228820	34915540	30488000	50528680	57289210	47548300	31358170	37948410	63439960	30595880
AP2A2	35223310	48187490	53765420	32435330	21491740	34927200	49550210	35894310	57350700	29803650	43886810	13402280
SYLC	32281350	18885280	38746970	54442440	38213790	20510960	29822930	30470230	39714840	31384040	48647850	27486040
PRS6A	52252120	30135060	44686860	77771250	41327900	42706140	35342200	40154750	23138390	46826040	63901910	52742050
ADHX	18256980	15772160	21271140	17856300	10502140	15324830	11395580	12738570	9727139	16304460	21102070	12457070
SAC1	30357760	27968830	33696440	34556400	24127780	30847340	40017780	34632320	37895320	25243280	39584150	22107620
SCG2	362919000	338589600	388767700	145795100	149064500	223351800	50650270	103122900	42574070	235288200	256834700	223622200
KPRP	10033370	3907006	2617788	36902010	30156540	9133136	28285030	12752970	14343030	9886060	8998443	9809261
HNRH1	64341930	61773000	80552370	185145100	61366240	59919650	52274380	59934980	31076300	67088160	100352000	84899570
RS3A	242896200	264434100	318650800	213089400	211187400	219491300	203145400	213100100	115000900	200151700	268516100	202447600
ATLA3	11289170	11805810	18736760	6667305	11619170	14821360	20176300	10481110	16748580	13230010	15649550	8954742
DC1I2	15917460	15030560	13589320	8117003	12186960	16602400	14618750	15604680	7821002	16971100	22450020	15755080
GRP75	535941500	455919200	596636900	686481600	612553100	567227800	592755800	668565300	350016400	623019000	695574000	559520600
SF3B1	24128920	25170720	29093320	40597830	22742550	21241290	30777110	30904770	26560040	15467060	23971880	15697980
UBC12	13095520	10857250	15587540	12347080	6633257	9137840	5201823	6040350	3698829	7813552	13476950	5888579
HYOU1	605668700	575663900	667995900	820734500	597777800	554319400	607170800	704367500	406538100	652772900	793401900	645182900
1433F	829498500	960685300	973056800	606845600	662386800	571697000	622500700	468293300	263154500	582900600	820493000	599640800
HUWE1	12914150	13074230	18348610	18464590	9683758	9489929	22015210	17322200	23767670	11808660	16641090	6155708
HSP90AA1	138869200	680287000	102890400	1648155000	1126651000	1851346000	1076461400	1066287000	1288005000	989436700	1562208000	827226600
MYH9	178737000	181079300	173368300	343401300	205797200	184965900	317093500	252730400	241337400	180429900	224841900	187403900
STAT3	6262128	6312798	7707242	7757076	4569857	6895039	9324334	5994887	8900370	6286743	9372329	4309890
PDIA4	319496500	255653000	308610300	524462200	582386200	401205500	328197500	400471400	211333000	465893100	621775300	504566100
VPP1	57603700	70409840	95611420	89906210	63548790	84482800	118820700	90603050	90332580	81558900	88474550	63080320
GNAO	211821300	219582400	282626500	254637300	226051800	217496300	243926800	223881200	202117500	235137900	286515200	196351600
NOP56	31674830	31594730	38814720	56406780	44233230	29142550	47585380	45685070	38870580	38371790	49019310	30629490
UGGG1	236001300	201126700	255164500	326798000	197939100	236587100	382205800	278833500	340951000	177998700	235701400	136941700
NEC2	70474810	61819680	80829500	52365140	48168500	62643840	48465900	43301190	31985060	50262140	61264180	46263690
EIF3L	20630730	27719980	32363150	16927110	11251200	18851210	37267730	19814740	47093740	12779340	22407720	6390984
ACON	277417800	243040800	266652300	539477900	377068100	292484300	440383700	462335300	318184400	308398200	389844000	289588600
VTDB	43185910	43519010	65241250	29917050	78443420	99800480	59633960	67502290	39312840	56011930	64485920	73808500
KINH	52645720	33987380	51974270	91655930	34805810	34256110	37085560	43556680	43448300	57858510	72277570	54941330
TADBP	55163100	46302620	58130340	44332220	36461160	48100000	42634640	40975030	34357060	50114680	62849410	35438220
PRP8	36539830	39464070	48448180	64457960	39565510	43857330	85126850	52030330	100079100	42915170	60778840	29152150
SEP11	28331810	19204240	34109590	21899950	10347660	20493420	21274600	16948680	21079930	22169480	29964820	14661900
ELOB	26281990	22967490	25575210	24145670	13700330	14006720	6955686	10184650	4930967	21814090	30537010	20773020
NPM	47091510	42167150	51029450	34583610	22815880	41997210	30534940	49906690	11506590	45511950	47720680	25603340
TMEDA	60647790	58387420	70568500	52436200	56836990	78992150	69154950	55463360	33804870	64983380	86928230	57891490
RACK1	388942800	400813600	483647900	352253200	266962200	310429100	438571300	289680800	411160900	315284100	439048300	183587300
SYYC	97333140	78126600	106002800	81490780	43684990	67905490	52506370	69724550	55898090	72758560	108795200	49669000
LMNA	300857700	251729000	300619300	517694100	217413200	183395100	195295100	217413200	193395100	290347000	241647148	241122900
ADT2	1422544000	1514101000	1844435000	1585004000	1183948000	1606018000	2772424000	1594174000	1948864000	1347823000	1729026000	898633800
K1C9	1740764000	1286914000	741860500	5848969000	3015979000	2638842000	3879823000	2673817000	4490958000	1579830000	1413607000	1269292000
DLDH	14024220	13735230	17899370	44982070	33356210	25434920	31466470	32517840	28047220	20833430	30900630	24703980
AT1A1	343159300	300819400	387827200	556807000	380070000	393756900	632660000	529126300	511930900	445917800	524616500	349613100
PSME3	1739008	3166645	3243458	1845312	1907496	1551654	2687175	1147559	1083560	2154890	2029251	1207642
AN32E	4401981	6481415	4069101	5728997	3912063	5342231	4993579	4070071	1547166	1972146	3814558	3822923
RPN1	87491730	97590710	114078900	118762800	92026210	111002500	159033800	123898500	135065600	97495290	124085100	83959970
ACTC	1431126000	1598194000	2207354000	1076355000	944329200	1054453000	1674483000	1032158000	990880500	1040151000	1402331000	779775700
NEC1	164944800	146102200	194858200	207537100	198874100	109090600	129870100	140237100	139580900	175922500	203548200	161987400
HNRPK	451451000	400103100	489636400	525915300	305422100	307710300	378372800	404387000	349838900	339729100	463698700	303604600
MCM4	83046270	79288980	96616680	129935400	85956450	63553320	79457790	87176640	72791880	67066650	94206330	62919350
CMC1	97037990	101660100	137851900	194455900	142533600	149285900	222225600	158578400	184295300	161402200	206546900	103988400
PGK1	645725700	643674400	818427200	366783900	392157100	435530000	368158100	441714400	317676800	445455800	653624900	366076600
TIF1B	18150590	15962680	22447630	27859110	18919400	11716580	17880980	21090510	14214960	20456290	27962660	21879760
GLSK	14528670	3866771	6397275	24261610	6803773	4526094	6126916	7210470	2519049	9179119	9486450	7974699
SFPQ	151794900	55388510	70254780	214559500	25495280	47866620	80474140	68482090	86602040	53747190	66058780	40808950
MDHM	1224224000	992825500	1273158000	1162803000	1094967000	1138139000	1084848000	1084438000	539898600	1340636000	1568203000	1146409000
HSP90AB1	247721600	244329900	327797000	2461409000	2614327000	2868106000	2111776000	2120908000	2517395000	1739277000	2799980000	1590761000
LKHA4	7992494	7944191	9685491	10492900	6561430	7459697	9283830	9542244	6882778	8929166	46405930	40621550
YBOX3	32713940	27160220	17645730	42534070	53842640	32486760	18153380	40967790	5102637	34309370	52105400	67131780
VIGLN	63615800	64278450	85710770	119630700	74391430	54183990	69956120	80487040	76991560	70363320	108211200	67684560
SYWC	11009280	5159645	11041800	5034720	2667152	4152079	7015534	6306439	5623500	9961426	12159740	3563620
NUP93	26277890	24563260	31777210	36436110	19242210	22126540	27896000	22420440	29624310	25420200	36861880	17170960
ACLY	2074729000	2408022000	3094579000	2092169000	1202629000	1497538000	2114180000	1788583000	2473117000	1336204000	2017025000	838807300
RBM39	27338620	11160870	15215180	39079280	11606300	13999930	8640601	13184850	19073660	20646570	25138730	21228050
UBP2L	9006340	9290683	7514140	10211820	4712503	8085302	7250481	12383650	3096642	7556782	7574708	4001426
RLA2	30376970	30202400	31226650	43908640	43165200	39563900	21766330	15619890	8567454	30949320	46536200	32943430
RL7A	175805400	188255600	238310400	247377500	167352400	133287700	224275300	216608800	176794200	148856100	225952100	165763900
RS4X	242110200	223404300	230770900	268795100	212141600	185607200	185015100	239960800	132071600	180170600	232064200	186044600
ABCE1	37130580	33891610	40763680	34491460	31374360	27687370	40600870	32100990	32883480	34433080	49073060	27789490
ACTN4	292578100	323876100	354926500	314475800	282928300	229548900	352796600	266188300	237477100	224817200	361241300	183963800
ODPB	40788480	31484860	42917290	64641380	48094830	44728680	60328810	49873220	29752380	54065200	65225640	43637530
RS3	743992700	766336400	768409000	836300400	503367600	584279500	818040900	732898200	626180500	448670900	605845600	445870800
PCBP1	99227620	103644200	130854000	76670500	73997880	61223100	63587660	68411000	45207400	103670600	139792200	97248220
PFKAL	48980520	53543270	68493370	24605910	24823070	48405430	57944780	38748160	73103130	36303020	48348220	11940070
SDHA	116995100	108047600	98061380	151880900	107804700	122456600	205808900	165384400	146888100	112906800	131305600	79144430
PDIA3	1971570000	1600892000	2190228000	1519767000	1293541000	1461821000	1037656000	1345434000	739482600	1717617000	1995386000	1620532000
RL4	126285800	166574400	191366200	147891700	97436320	119212200	193587600	176280500	179627400	108434800	162829400	92378500
MCM3	168618400	139451900	187687200	237291600	143346900	154719700	156650200	178075700	164811200	178587100	218287200	166587200
RS2	274610300	287108400	385935300	297600600	269521500	221175500	351804100	331991300	231192900	258456700	328093700	241811600
K2C5	532631800	582624200	303028500	1966230000	1302036000	965363000	5325078000	986549100	1740148000	945362400	563232400	758786000
SARNP	10485910	10826360	12928150	6162511	8278117	8886504	2554527	4148926	1051543	6443419	11557490	9421843
H0YHG0	10485910	10826360	12928150	6162511	8278117	8886504	2554527	4148926	1051543	6443419	11557490	9421843
CAPZB	22343400	30853100	43032420	28376580	33955270	26877690	36697040	18900590	20143450	20722490	44840700	18813700
MECP2	2102051	4340077	4775596	18794390	18764430	6804573	9091605	13892050	2430811	11679760	13856450	19706370
PSMD4	31928960	27012320	34144920	32927270	29504850	33876060	29039480	19026210	16760610	45369250	47811780	35409750
HDGR3	21273640	19001300	17622400	24471170	32173570	37527400	13674350	21005520	7960335	30705320	28964330	45975770
PSB3	20998710	25812690	33484930	8140341	15886910	19191980	23339450	13035310	16203930	14776610	25988320	10157700
ROA3	189352600	152601700	139975600	280866900	225540100	137227400	114443700	217919400	88180500	128249100	202039000	179824300
LIS1	99225010	105814600	119991700	112726700	106893100	87611310	100846100	103062300	69852820	122932900	133808300	122472500
EIF3C	41654950	44035040	55052560	48733440	24971700	30934540	45991670	40931770	42817270	33676550	45437350	23874190
KPYM	3367477000	3723877000	4763656000	3230287000	2589697000	2162942000	2884367000	3124027000	2698354000	1969796000	3084341000	1755543000
RL8	23495880	2533789	3919014	41031930	3708377	2388114	3955100	4061388	2301788	3712096	5724312	6079753
ACTB	1947752000	2181143000	3047200000	1443241000	1090784000	1437728000	2312498000	1325953000	1411082000	1354960000	1906200000	951642100
ACTG	1947752000	2181143000	3047200000	1443241000	1090784000	1437728000	2312498000	1325953000	1411082000	1354960000	1906200000	951642100
ANXA4	105839000	92896930	125005300	99965090	119298600	147233900	115047400	99763560	62601760	129954500	151688600	115079200
EIF1B	3916184	3440353	5312423	1104681	2536074	2784991	1445965	1546888	493484	3259713	4951888	3937746
EIF1	3916184	3440353	5312423	1104681	2536074	2784991	1445965	1546888	493484	3259713	4951888	3937746
ALDOA	682258700	654377400	852631400	457732900	345329600	470824600	431724000	565310300	321503000	249265300	320517500	284763300
PARK7	88184380	93187260	108565100	84539500	85433130	68696190	50754980	51189270	29859820	64346590	105458500	72982350
ESYT1	112361400	108887400	158219100	137613000	82197900	113503900	124375000	72928600	152919700	97151640	119990100	68999010
PRS8	56161200	59797610	73095740	65299660	53020390	47431920	56840040	61540730	43253490	54469590	71012310	49933430
RAB18	52608050	55798380	68559130	43986230	42385270	47542350	48858330	38650990	41375940	51153540	78004200	38221840
POTEF	528733800	662253000	920032800	387169500	422070800	425031200	640161700	431571400	428907200	470194400	613438800	351496000
PFKAM	50396370	53150080	70164970	29278990	22726780	47036380	52933490	40633820	75601600	41633410	51991560	17968560
RL18A	80629090	77209120	85729590	83205160	71099370	73460530	98699650	87526700	82744280	66800840	93663010	54784050
TCPQ	183509100	184634800	237607500	169597200	122487500	115798400	127528700	118715800	101926400	116770300	175205800	91939560
IF2G	48691090	47961680	49325210	84671500	54006220	42342570	56492070	50068270	50766570	47730740	67956950	50681810
ALDOC	59905180	72464220	96006530	40457400	19792540	50490970	52951920	43436430	35897030	39699450	50289910	29070460
FKBP2	161026300	172518800	223387600	103176800	100086600	129675200	69336810	93146960	59454820	122970500	112523900	125079200
CRK	1827374	2694455	3779942	2495739	2251381	3027166	1633521	2649063	728341,7	3468697	4085015	2505601
RENT1	13644190	18565400	21365630	25969580	18291000	19588720	31692290	22188720	23599690	19912470	28069710	12367130
HNRH3	8918966	7242143	6148467	17912660	13125590	10052070	6184065	18084980	2795121	6648591	12661460	12717340
AOFB	96728770	93261670	114349700	135671400	113647600	97964200	149717300	117000500	109041100	108589900	122388600	89182510
STIP1	83980990	87941780	105619200	114135000	61442220	53476770	55768620	90587340	31353040	71536540	91126420	61551740
G3BP2	7761165	9952090	12830820	7686782	5860270	8463859	6131250	9604490	4175793	6928917	6298488	5774428
IF2B	12255320	8898445	7626783	12390860	11359990	7568980	8232706	11914320	3612421	7025139	15128660	10561180
RAB3A	300387700	355361700	418535900	236261600	266922900	291031900	370965100	246893900	334893100	302483300	378937400	199252700
RBBP7	70883620	78680110	103124100	72133680	54435750	62183810	69531210	60899550	64878940	59073650	78650920	41206560
PICAL	4913171	5881742	7530841	1311228	1763191	4677917	5156688	4317112	3959623	3373694	3895655	1115449
ACTN1	227769400	260929400	289839900	272565900	223302300	194540500	263721400	223411200	204204900	185976400	283465600	136550400
PCCB	11796420	12105770	13679580	17378300	18739910	16785250	27334750	24119200	20308230	16033380	21161860	15945550
TRA2B	14335600	16884900	17399480	8226119	13977610	12678240	11123240	9783489	5684541	11652830	14528030	11601040
TBB3	1343011000	1373099000	1685599000	884584200	753079100	1097921000	1082255000	875320900	700543600	973195700	1199551000	759352800
HNRLL	4580516	5654897	7868953	6649992	3569917	4305264	4660456	6464614	4945276	4700385	4816395	3957398
RS8	267288900	314545500	335683800	357188500	246226400	217536500	287219400	305824800	209131900	239950300	317949000	239509100
TOP2A	38846310	45254930	65574900	61432580	50696390	80373120	67892370	38463700	45583360	42204580	64720420	25483470
K1C16	542986300	482492700	280108100	1229354000	684933700	712877600	3605621000	504532800	1678400000	902930100	482216300	399981000
RS14	119412100	110054300	94511330	161365700	137463800	73066210	56455540	137652600	28347620	98595570	158954900	133971700
GFPT1	30137710	38486550	52247300	46104320	31084960	37487660	54601560	40683150	75516980	29879660	58947630	24185520
RAB2A	72622250	76142990	88593530	58941030	64954350	73773170	68885240	49559080	60414580	61596700	94164760	45120770
SRSF2	61592910	62026840	75993580	52290860	49929490	40159510	30219880	22262030	16422050	51950080	66365570	48795020
FETA	5656443	4245685	4198933	101776300	147276900	87985340	64298430	66370080	27200420	102385100	103359200	111641300
RPB2	4341130	3999314	5907864	11267270	5664454	3830435	8127535	6961913	6290623	5884410	8725535	4635450
PP1R7	4189736	7824472	6841212	7778841	6313443	6016872	4945096	6349487	3133405	6021578	9802446	6361993
MEMO1	1452983	1766607	2022281	242790,7	1120070	860126,3	2586552	1023591	1284710	771104,2	2625018	727695,9
DDX5	396963900	405936900	518318500	451238900	299247400	327792000	385256200	377976700	360141200	362186500	486968600	317183300
GD1L1	6555467	7201158	6166681	9162112	6994192	4918796	3771042	7758183	2126983	5106555	12070670	6947809
OTUB1	31461770	36563510	43953500	28629470	20043840	29467360	31316160	20592980	26726960	16365280	37270140	15445090
ARFG2	3484141	4722308	5549528	5058713	2643369	2178245	3218385	3480627	2160281	2591674	3413091	2618446
IF4G2	13788090	14907430	16029350	17489090	13261450	13053610	12658140	12927600	8193308	15515380	22283790	14330300
SYAC	223601100	212614000	255461100	229552900	168391200	159996000	189707600	207596400	179391700	184716700	241452400	143662000
NONO	125201800	48135560	64603000	189140700	43961850	45521540	60355970	55016120	61482710	50147980	61372980	37386990
CDC5L	17839190	19956310	22022490	22629390	16503150	13417870	22504660	20945890	17386090	18082640	25890860	16428160
KCRB	33555630	35704030	45078430	30661590	29115150	30073620	28803830	22852690	18790910	29241370	45224930	24231930
NTF2	23663460	29885960	39340860	14623660	16903260	21683890	14489870	12267680	11050680	22635330	33378300	14433440
CTRL	216246700	31218770	38059240	27868260	35757460	37310550	308837400	42071330	94505320	116593700	81817660	94612360
H90B4	809579300	549021900	863048400	940252900	562897300	589275000	458123000	645095100	660083900	484267500	820986900	527615700
ATPA	2248369000	2155361000	2196479000	2255092000	2382622000	2360469000	3326985000	3154669000	3145845000	3635889000	3098325000	3528364000
K1C17	386101400	410020300	230325400	776624500	468091800	585583200	2877832000	314687200	1247292000	764017600	425738300	372516900
KCC2D	8768618	10039300	16427500	8010134	6133708	10748470	17074090	13437270	11207250	10463580	15046050	7186522
ADAS	2936875	801729,6	1857362	5544107	3107200	121159,9	2125512	2797903	1552440	5806617	4859079	4332274
API5	13872070	8081885	7861630	11612860	14921270	5886284	3572901	8568442	2132811	10082060	21161210	10966890
PDC6I	50318690	52274270	61951430	94968090	46050690	46294030	84276110	69785740	71350480	53672880	74413240	43113520
MYL1	1174561	1101251	2363360	15471,92	15471,92	1533533	1251116	162470,5	182383,4	1189972	1406116	490755,3
MYL3	1174561	1101251	2363360	15471,92	15471,92	1533533	1251116	162470,5	182383,4	1189972	1406116	490755,3
MYL6	100849900	103001200	122213200	72534830	67915330	98937920	71102570	47991070	20907360	115095400	125997200	99131360
PYC	247254700	207700800	259023200	449123400	294227500	268191400	487914800	385003300	372399200	316750400	385114100	238095400
SYVC	63135890	68636780	89040940	92122350	57173030	56329480	96058090	88733520	99243420	54901590	82708310	35547800
CISD2	22924280	21879640	28734280	23279590	33620280	34330890	21166560	20496240	11883290	39285570	44337960	36356030
XPO2	7805929000	8289522000	11038030000	5319982000	36185660	4058923000	7019741000	7132518000	4570118000	4300559000	4700509000	4289420000
SRPRB	11326600	11190470	12947200	12618240	15814850	10319490	6967832	9984991	4160458	12089040	18302960	15490000
IF5A1	20531490	16859630	14077000	6765388	15810720	12480480	8830530	18376760	4324489	11480360	20810640	16874390
DDX3X	140951500	120754800	159692100	138932900	75875020	114476400	156965600	134509400	117255100	115524600	147397300	94093960
ABCC8	46460030	60330530	70019060	54734810	25969320	57516930	106777000	61339370	97572930	37225120	48432600	18155750
TCEA1	23383750	19854950	31744740	16252110	15015900	22317210	6164562	13749020	4963869	33477360	37352280	20975670
VAMP2	15209710	14480130	12481310	6522864	12482610	6389118	12588740	17140730	14629770	12716520	17161220	13006400
L7N2F9	18077300	20601670	22755460	12588740	17140730	14629770	6522864	12482610	6389118	12716520	17161220	13006400
AP3S1	2623635	1512843	3088164	2434695	3062024	1898629	2129897	2499405	1619365	3131272	3958019	2248730
TXNL1	56269890	50063810	65597510	51432140	49180660	40400360	34304740	33495480	35306020	52584200	72553630	49493770
1433T	818664500	927713600	966018300	596613300	601746000	591378900	614945300	457869600	270303900	598447700	848686300	605275200
PPCE	12431630	11942260	21322630	11349670	6544788	11051140	14552490	8260712	12482500	9041642	13862450	3602139
SNX6	1040815	1423078	1594394	3728713	1031360	1534856	1322392	1844340	840920,8	1398232	2036868	2539571
XPO1	31958070	37472930	48536400	34629590	23567190	21610030	38377260	26448230	16745220	25362610	34534400	15576580
SNAA	56810840	57502210	61672770	23803680	31992820	48393690	33447530	25480110	16405220	34682440	44247750	24145510
CAP1	16862430	17884970	25924680	15297970	14731150	14531060	20228090	17130040	14646680	15699700	22593870	12834190
SYDC	82521630	100102200	125907300	96632270	49727340	76859800	112682900	89569640	126587100	64765070	82829170	43086600
SEPT7	26356720	24378350	34525490	25411890	19639820	18615370	27646210	20732550	16659470	22353950	33360020	17202660
AT2B1	20008220	22371600	29636900	41765540	26573400	30296590	40116850	32585170	32959350	27856700	33413830	22497940
OST48	248764900	249910900	323761600	261259000	234466100	294078900	366939300	303205500	285814500	287117900	328830800	214812700
STRAP	13076550	20902400	26134880	19780730	18407880	15351810	17768330	15097200	12437440	15563040	23887280	13902430
SEC63	15321790	8386912	11994850	21901490	7295927	8616755	14835880	12053040	10935610	11647050	13983120	7902165
CRKL	2472436	2277004	3834205	1708292	1529689	545697,3	2804934	1960247	1919385	2387433	1968996	1501211
RS11	173663600	80293920	137659900	156364600	57917680	123557300	113341800	150335300	114575200	160108500	186580200	146707500
COPG2	9526907	13859880	17571240	13202870	10437000	12443970	16000960	10802350	14274360	9794484	16629240	7523997
PSA5	6863271	6317742	9361726	3140014	4768962	5173378	1988796	3307463	1895521	3748041	6585521	2174448
2AAA	123497600	112970500	145315700	106114600	78097180	104297600	76415770	78589890	62584160	96068950	126656300	65765690
GNA1	988916,5	310528,6	656233,8	781516,5	502214,3	318882,1	140799,2	127877,3	47871,45	603149,6	836588,8	460429,5
AT1A3	180573000	143034300	191474600	304738800	195499800	190446000	313194000	251625100	255844500	240397500	281215600	177174300
NSF1C	12697840	10295890	14723310	8885577	8558269	8105238	4374167	34654990	2923957	15082800	18281350	9632772
AP2A1	50925180	63870000	83814070	51440100	34153320	53769910	64777580	55464940	71848890	40168190	60720750	22331530
EP15R	5631650	5103819	8293628	7891708	5699853	3192948	4272551	5453613	3882388	3749243	7910959	3680716
ERO1B	267893000	259369800	333528000	175710500	141081300	233924500	165847300	186831900	119068600	202885000	275349400	155027500
AHNK	37931750	17893330	12465690	285064200	151787900	50632140	84660060	104189600	16564570	68638670	85380620	160351600
MVP	20750340	17168400	20770100	49969910	20870070	18878440	37056210	29251840	29812420	15422870	34230810	15155330
ITB1	14997280	11789090	16117700	17935110	10831500	15980130	16133370	18816050	7789670	21401790	23458370	19905350
ECE1	31134050	30407700	39742580	25836140	21728770	36186970	23600100	25749280	17515330	26731480	46268620	32836180
RS24	34522530	40517100	31877360	6649854	4046340	36734320	41222760	35812860	28134320	6147671	6104978	3820909
HSPB1	971298,8	1080765	283312,2	2314429	4378439	1258172	221465200	3033028	2153769	3873119	2679059	1909544
LAP2A	67209800	57919910	58627090	55675870	52161840	44724850	27372080	54020930	12596830	57061340	63698840	63433420
PPIA	1013668000	895596100	1256634000	558597400	498421200	582041000	372799200	470872200	244194700	698036000	778817400	592271800
CALR	197914800	230213200	272851600	198644500	268036000	177425000	120049100	180773000	112174100	261558100	301660100	171526500
PARP1	13858550	13425240	21156820	19437670	16826460	12925430	19546870	13996560	11221790	14357090	21432920	10105450
HDGF	28357110	29834360	34089260	29332630	30820770	32323410	17570450	25903430	9254865	30909620	41932520	39161840
SYRC	25060080	27251590	35497490	18848830	11444220	18618540	26312680	22210200	26785830	15588350	23419000	7829981
IPO9	3874689	3914679	5858166	3169449	2936217	3287767	2836013	2954826	2422432	2391633	4372909	2325067
VATB2	242946900	235241700	295293500	252117400	186335300	212244100	239351900	242932500	178964400	217590000	255787800	179431100
VAMP3	13800000	13658950	11929510	5502748	11639680	5053944	15738140	14437800	17379460	15015400	14631780	14392040
ETFA	31965010	27951860	34597890	52892250	44220160	47426970	48004880	45625720	27883410	51233800	63359010	49392140
CBX3	20884140	21063920	23183220	13638140	16789700	17662730	7779337	10803000	5334131	17766420	22782840	17579440
GDIR1	36117790	36464450	49599740	25878380	27192030	20311910	19501590	17499720	15300340	36804570	55778480	29242330
RAB1C	359256500	380959900	437094600	239843300	303578600	294016300	383098200	262765900	325869300	316247200	380924700	236686300
RAB1B	359256500	380959900	437094600	239843300	303578600	294016300	383098200	262765900	325869300	316247200	380924700	236686300
DNJC3	77141760	66502620	76940100	86070630	62950660	87375570	80597310	84679400	49816030	99799600	115519800	99154330
TRYP	6700350000	6146469000	5870252000	5657375000	6287281000	6466410000	3907697000	5048110000	2836873000	7253284000	7479766000	7179692000
PRDX4	124568500	180019100	119026000	390765400	305681800	302343200	309034800	205637600	169753000	259311700	300642100	322959200
TMED4	81808760	59593050	75163100	13560050	25274350	85171820	53528580	55437480	33871790	52761920	22687660	19504250
U520	42177150	37051610	55725530	58857470	29729360	41424800	61062520	46006720	70292050	45230790	62433790	22687330
SDHB	9821169	12783490	19246000	10540970	11817740	17013700	11811790	14127390	6747947	9439321	11741110	8889480
APOC3	5589213	1722610	3313049	8205444	6912109	9829195	3024524	3807474	867734,6	16208260	12115530	15086880
CDC42	26339680	30509530	40413580	23488730	21193350	23289300	17012320	18279200	10405650	16703960	28056150	23671880
AT2A2	443963700	319481000	428239900	470291500	264535800	319879100	336381900	358362200	397550200	322156700	386816800	256298900
HSP7C	1414448000	1378426000	1766673000	1520321000	1154052000	961738500	1107325000	1056437000	909347200	955591500	1262886000	822437600
HNRPQ	144026500	128663700	176885800	180613900	124549400	94252060	173909400	154053900	179739100	113380800	159881200	80403570
TAGL2	77360250	76058690	87456100	44430450	49651830	59711920	55715980	36390570	14283820	60506790	81572690	58407740
1433Z	937403800	940711300	958590600	659421800	611911800	573944800	771998000	461792500	271522900	592511100	831707300	589040900
HEXB	63668000	53179440	76251080	63456120	64079880	95177590	85982790	68420840	60610980	100876700	108750300	63670310
VDAC2	179383400	190444300	233708900	230595200	211291700	268415300	344021700	265694300	238036800	277158400	300476100	217534500
PA2G4	63297400	61602320	59095770	68638510	49492030	35755380	50853100	52511610	26272980	28670490	52026790	36112950
TBB1	809682400	774653900	886655400	531966700	394298600	651474100	644779200	480226400	414782800	510635300	635846600	381241900
EIF3A	104957000	105687800	142847300	95867590	58613000	80895640	125427700	108502000	147390200	84474360	128935800	51322140
LMNB1	83337920	72789650	71220630	122308800	92793260	51602790	64028330	92893160	60286490	64044570	92938660	71634080
SC23B	49732140	38227890	50636420	51944940	20640000	30624450	42044780	38229900	48905290	22011100	36015660	16109150
MCM6	66244280	59359400	77583280	82264080	40775670	58854500	50746900	75087220	66586720	66885090	93729160	44822580
PRS10	61575810	64706280	86508530	66660160	55485280	55307010	62594680	53484520	40620980	61728650	84373880	49876010
NFL	231540500	210761600	227700900	271241000	126974000	136578000	149441100	184797500	204241700	156099800	253049700	157635800
RS6	138480300	60485400	58615310	175206200	104297100	60672900	84276110	133037400	57550600	89869400	121397400	120585700
OXSR1	11982330	11123230	9893563	11348890	11575430	9777154	7372281	10088760	5324575	12794190	17263140	12953150
HNRL2	25364890	22070680	22004480	56958990	39062850	23596680	33522750	41927920	25649430	25899360	31384660	32463970
PSA7	99800370	103628900	120188400	95369750	104969900	68606720	62492560	67165250	40596990	63359560	121092000	83234590
U5S1	307418500	36142060	45626970	381911400	39585500	50757540	63739000	48619290	82867650	76514250	77133460	61238020
KAP1	28488560	37014170	49280830	30688870	32170320	36138140	31381320	25577680	28213140	35701480	41746380	24656050
RADI	92738160	102009600	134113900	67710500	40194490	71090240	151201400	102629300	108134900	60292120	94058840	37633190
CALX	122984500	106214800	112691000	117807400	84672520	127077500	105076900	118715800	57111230	116687000	102102700	96703810
SYNC	45697560	58210750	70203190	51544750	35834370	51149150	49838840	41055280	47708370	44569700	58344480	27166630
ANXA2	19268010	15665810	15399700	65232730	10726120	15758040	145618200	14961590	11464790	20947110	13081850	14127220
LYRIC	2483128	2163462	3191925	3719811	2741873	3642039	5009768	4026065	4304929	2891508	4529594	1677739
GNS	44431380	38938500	44774090	38919780	40491530	45379570	26554730	34279820	17654400	52288960	49489370	36021040
SC24C	12741700	16174040	19764120	26948280	12829300	12881550	27152880	17933040	27794490	11617630	21588160	7251420
MANF	30257800	30342030	43246790	8086989	5974661	33126170	12680100	15517390	8474599	22968900	15991350	11519110
PSA2	19722370	11362450	16198940	19746640	5413689	5087683	4180743	2788880	5611996	47905100	163526000	114655200
DYN2	45508450	40532580	53402840	59306500	28730870	31518990	62099620	51872620	62424470	36022900	52536760	26720500
COPB	57655770	74459420	110055200	69730900	48236030	66913220	81556480	60000690	97276520	54432220	83772210	37860180
SSRA	105175200	85321860	75948120	100722000	100829700	121891100	58554660	72205070	21492280	59001820	79951970	68519550
PAPS2	68018460	76913830	112391800	78399250	40084000	62255680	62054770	71763740	65743600	74604180	97654270	57647160
CISY	129103200	118186300	148574000	142088300	144736100	142981300	184562200	153171800	107412400	150397700	187410800	129786300
IQGA2	46686610	50555480	61725130	39792350	29994670	48466220	70213600	57278330	56623530	39400990	41394250	24662760
COPD	51332900	56433670	68495250	46421380	33186310	36236710	43819250	40341410	38689110	27774180	43348430	17474890
PSA1	107621800	110406000	144345400	69168690	40030870	78461510	70981750	62703840	63016490	74699420	110379800	69581150
K2C6A	657677800	564252400	305326200	1943044000	1285753000	907890700	4187961000	1030392000	1869156000	1211535000	610166100	841037100
PSMD3	33183390	32449290	41886550	46359240	31378700	32010000	58129320	38987270	49504800	30028150	45284550	17254300
PURA2	7246327	10580560	16092220	8940566	10452950	6662475	5295047	5076228	3807558	10065440	12368640	8290606
ANX11	27776430	20420110	26190730	16458820	9647866	35561420	30769240	20516320	19664510	10027530	10100660	7272893
PCP4	18731890	20747240	11284580	9012068	10582090	12615900	4151318	5965917	3729835	12745030	20241780	12005960
SYCC	18369720	17053520	20574970	29400340	18090940	11495220	17018720	21888920	17284130	12930210	25777120	14862960
1433E	902737800	1034954000	1083900000	634181600	691173700	646819900	685750900	507237800	293660100	656473000	938831400	659807100
RBM8A	5366964	5061269	7377463	1760631	4168025	3020373	2323745	1697798	987864,9	4254594	3525105	1889352
PGRC1	98101220	92254340	119365400	79508230	85116290	110339300	67816450	78736020	35154460	137152900	125526300	115180600
FUMH	35726930	42107100	52579290	46435550	42937840	43841100	49063840	42666300	36054990	42366700	50652710	33188200
FUS	41414530	34482830	40726320	98957250	58248020	27141290	34303460	83733130	20802780	42366930	59740650	48531820
RS19	82085980	80933040	100886900	69164360	65357900	45695300	30167440	34135930	17429270	75836290	115660400	78272040
PHB2	184546000	170965800	207307100	226176900	197524000	252606700	351686700	250845600	242148000	257507800	283312500	163196700
CKAP4	9850035	9939445	10552240	15632860	11286280	12857460	12231580	17670380	8246801	15187060	15626510	11855730
IPO5	32578270	41991910	58716700	24831250	20850870	32237290	38173400	22218900	30355030	22750820	34085520	12318110
GPDM	91205900	79541230	103104800	145157500	146955500	131952200	161602300	152215200	102978800	143115400	160711900	113462500
RL22	203566000	213311700	287344300	167160600	208702500	161499000	184727700	173223400	108970900	227521400	253303200	195095800
UBP5	58575300	57315700	60791190	62313330	43940710	43976910	53129720	46577090	32728560	33905640	60847550	23298690
SC31A	70136170	76630190	97873030	82187790	51241170	58076750	90322860	75121270	88642180	59711200	80682930	42550140
HNRPU	437337500	434076800	535023100	632854500	381290400	386795600	525981100	529875100	568116600	461738700	543820400	339106000
RBM14	18810560	14990100	18756130	21281930	15789450	13849660	15094600	15883170	11624620	19621240	25286950	17784260
COPA	213996700	203393600	280512500	274444600	142901200	191441000	318832800	234006200	366757300	186352100	236359600	115234500
PFD2	7405738	9364296	10665420	2388164	3198180	8763479	21424150	5635676	3659761	7779192	9476477	7595687
G3P	288048700	135233500	180905200	163285200	102796200	106837300	288835400	138974700	113938400	120520600	127386800	85254810
CO4A	5653010	3537971	5940888	49324840	17490900	36816740	19999060	24341600	18857910	36715530	34339180	42129800
IMA7	7244728	8530032	11325770	5773711	6532325	7482058	6651234	6141558	3984687	8468879	10241220	4628417
TCPZ	183059100	167838200	170160500	183653400	143503400	118287800	131437400	151895600	117620800	106679700	164915800	122733900
VATD	39046390	39660800	40331090	35667820	42581970	40768330	24820180	27851400	15577520	42447720	56560960	49619400
PUR6	36808250	38785450	53242770	35387240	37027660	42063620	40994780	34932530	34050430	39272070	49477140	27321730
UBA1	322795400	297898100	385710800	384491300	280953900	215511000	291193000	264683900	258638400	254968500	361164400	199168700
GSK3B	1182726	1408760	1812880	1492741	1253344	943839,9	1156072	1127558	886873,5	1754177	1825140	1083132
G6PI	21936840	23687350	31249260	11665260	11959200	16486510	19787790	15018220	18896530	12537740	18638990	4708102
DDX1	49464700	59650790	66313780	79469300	54173820	54098630	63563090	71538110	61216170	51937020	79870720	46777120
NSF	105084700	106317700	138078300	125248500	110665500	98712980	101349600	100554500	95198700	113695000	143785400	96731210
AT131	12369630	11668820	17134480	22515390	11007770	13285250	27349730	18367580	21620330	15476470	20106680	9074422
SF3B2	24255140	19479270	13368010	34540840	16890670	24047670	30366130	42645970	21780600	25400000	33573170	33163720
M2OM	40647340	23391400	28079760	52881910	19061100	39007310	47086550	25011680	38548890	37451540	40033030	18294880
CATD	20886890	12392810	21266940	26502820	24921410	14236830	94481560	11130450	10432410	30383840	32308650	23466670
PFKAP	47186950	50452790	63268910	26029840	23818560	43013190	50278100	35512850	64768690	34770630	43514950	12033350
GSLG1	35982730	29484290	30630160	59030400	41460430	40170930	43289740	53469430	23328820	35628020	44645860	42480260
TBB5	2075654000	2089570000	2494054000	1287988000	1216557000	1622320000	1507747000	1333486000	1034252000	1559918000	1894050000	1221346000
VINC	61280530	53478290	68101560	98866030	75099340	63645150	60815090	70799620	36644810	84853530	109359300	79774760
RBMX	34471280	45148620	47206950	59622960	44019180	35614330	24339600	45743550	24536300	41874550	56954680	38887150
PRS7	83904950	71837130	97182040	93228300	80637500	62406850	72844010	79636920	55360600	77269420	97847460	67009020
COPB2	101677100	111000800	137377500	145946000	71883920	86662440	153256900	104496400	170761300	84964660	118938900	48583110
NAA50	2002996	1679241	2087770	937256,6	1159708	2409598	1400835	992578	1738537	2011925	2656205	2186350
HAP28	43049570	32570010	29505500	19983630	27237860	29213900	12720340	27420420	4866527	31001080	39667330	40477620
ROA2	593546400	399244700	597469400	601283700	411165400	370772100	217848600	351982600	284081900	425403800	622782400	499550900
MK01	32391300	32042950	42369170	29638950	32631220	23859470	34146870	28513370	25649510	29755220	42194200	22662640
MK03	39267930	38640210	71865060	34817850	30882520	42567200	54547630	32294110	42755780	31494780	45672580	41745830
KIF2A	11566590	50532780	36144680	12827510	18134590	60501670	18265340	27190560	30530310	13252720	21175040	14788100
SMC3	16890910	14720090	18584470	24658700	20966940	13618390	17759520	16475110	16181160	13969680	23009690	12899480
PABP1	189030200	203194900	264629300	204313900	169935000	161724000	178007700	193253400	137821700	190792100	238309300	164028100
DHE3	110363800	76359330	100947800	207947200	145310300	104865800	183159200	155968900	124839400	144485900	180860700	131840400
TBA1A	1726674000	1739487000	2378868000	1294177000	1029207000	1232086000	1468571000	1299374000	1142767000	1397394000	1770942000	1081117000
GLNA	5890215	5209281	7369084	4972160	4353034	3296474	4791020	5541351	2721628	4601945	6484896	4723423
CNPY2	69903990	71099450	71842970	42680780	41315060	61720930	21607180	31309290	12579660	57544780	83065600	51695230
F8W031	69903990	71099450	71842970	42680780	41315060	61720930	21607180	31309290	12579660	57544780	83065600	51695230
AATM	186679700	136472800	177125300	279969800	151480600	194184100	205599800	194460600	144720200	168269200	180954500	140195600
LMAN2	80070040	54077550	54273540	110962300	77943160	89826390	90990250	70292280	60829520	56262600	80950290	56725640
NCLN	44390230	41336070	44645320	66642380	50280860	53909420	82498530	66871140	55603720	58813550	62613720	38425500
CCAR1	2548535	2674868	2786627	5595218	3594503	2671939	2006829	3774782	1867892	2271208	4264415	4179756
MCM5	113916200	94916690	121706500	143847600	82664910	93499130	123924700	109772400	131021000	109432500	129041400	73886500
PTPRF	23957800	13807100	11674460	99762900	87867180	99494460	20417690	72214190	20430970	14495270	20816540	14600160
HSP74	75585660	84055340	116352500	85372270	62400350	68255920	68891520	77637470	61845000	64370900	95006880	50156410
WDR11	599065,6	542406,6	897970,1	1377580	302867,5	724789,4	1188091	1467344	1792234	652222	872285,3	107051,3
RL12	207905700	225638200	263676300	173426200	163459200	128269000	133268100	162611800	79662550	140811400	211633500	159837300
ILF2	15230130	19804350	27033890	8370537	6810814	17707000	20989170	11422240	16122620	9293631	14460140	1962172
SRSF3	136576200	94767260	129767800	173801000	127802300	71467460	81149980	88345640	29406920	131873100	167013100	131238400
VATA	426586200	323091800	420311600	554198900	241064100	322523300	343313000	394025900	311775600	331489400	425551400	298501800
G3BP1	6034007	5639254	7442443	11100880	7073505	4915384	3794620	6179416	2611280	7283857	12459590	7385324
PP2AA	58391460	61453560	56888490	64132670	52280350	52937910	54153600	56707710	34616810	43310750	83048450	46352110
IF2A	136547400	105748000	124310600	154173700	88583700	87907420	100372200	82606390	100445900	89217580	129778600	87672420
U2AF2	10789760	11282740	12383270	16477170	11534290	12535020	12097060	17527930	9354893	7575307	12521360	9315708
TPIS	479701600	509457000	758054900	327482600	352434300	351771600	256378300	262416500	201749000	420354100	562516700	310749000
KPCA	4005369	2730479	3576826	3838966	4501473	3371954	4127108	4440193	3024661	3444420	5301195	2611770
DSG1	8239036	7447978	3295675	66068720	32675920	21376660	230279900	41411020	39860040	14371110	13610450	18175250
SMC1A	21230350	17458900	20753960	37428110	24976880	19741780	20276460	27394030	23838760	24748120	34173200	23100820
HMGB1	29329340	29329340	20129170	54976990	54383650	49757870	23447330	20060900	23447330	31395240	28519820	32297720
GABT	16816390	14738110	16043250	23670560	21808360	23331280	26417320	23384800	18978910	18678900	25911560	18300630
SYMC	2149231	1689349	1313380	4477271	1693763	2417572	2465605	4775465	1231876	1972637	4058469	2891553
ODO1	138355700	122670600	138036100	263317500	158224300	165688200	313681900	276666500	224606500	137324100	180561100	119972500
ROA1	79123570	65631520	52929720	127359400	109888100	43076240	42303210	74190930	25949800	37008720	71299810	69791260
C1TC	47685750	42283240	65040630	48218290	35037240	27502580	40946380	42185260	38609680	42178820	56468620	33911750
SET	29919940	16837340	30768330	40023360	44032710	48475260	13166650	18865430	10322430	61875900	80636440	75566000
P5CS	96487140	65954200	89808740	119606000	72626550	75185390	122656000	98757430	100010500	95475250	108285600	75045100
PTPA	6087101	6497782	5839441	4484582	4173291	5115365	4079323	2501574	3558697	3748548	4264916	2314390
LONM	63341550	37097610	53674300	118123700	57060020	77936230	105029200	86406860	97891950	79259300	92754040	56593450
PUF60	5412827	3619210	3537858	7491429	5883893	2653153	4234508	5520636	2749362	5290404	11188400	5514282
SF3B3	42628370	41059060	64047450	58955910	32479690	39285440	64387870	43895580	67131260	43858770	58253650	23414630
AT2A3	249293200	222442900	235641400	321908500	226631800	198793800	246961200	280181300	243423300	245570300	297706500	203400700
DCX	22922220	27162480	37359500	38191560	25845670	21638920	26302860	25305390	20150040	20851880	30178600	15400890
RL35	63442400	58094100	34288130	65266900	32484760	40107420	52557590	77414630	24378410	26984010	41970750	37648440
NUCL	265572400	259657600	244723000	404786800	247363300	235074400	301611100	377308300	239610100	284008300	353289700	297966800
P4HB	240137100	258045000	258360500	1370753000	1012767000	1348217000	752034700	710568060	638935600	642836900	856612000	1338967000
NB5R3	58560250	47763670	85431540	41615500	35476490	61968910	58578130	47349190	25010440	61013930	58540260	27331990
TCPG	350671100	370385600	468473300	333137900	274307200	239671200	274814800	293408100	250192600	263285700	377790000	235728300
PSB2	48059250	33120530	65507190	32808870	13717780	41114280	31651610	19980540	27243820	34442120	47236300	25987950
NDUFS1	65326410	76387000	57585540	89142100	95356900	96127930	143091800	137593200	157727100	130916800	141768500	190246430
NDUFV1	52197380	61910080	60970140	72612000	83747480	89024420	118954600	116160870	10350360	117701590	113649300	102533050
HNRPR	123217500	99798180	131967800	152589700	106378900	76103040	137824700	126799900	140442100	94293050	132738900	72725180
ITPA	8526651	11485340	14535610	12680890	15475450	8832993	6718074	8537106	5183760	11838680	12925560	9443966
LRC47	14225630	17287930	32364890	26308610	19505920	13112800	19229220	23731760	13329640	22066830	27295310	19084750
S23IP	7457666	6986056	9893151	14777090	8763383	4870435	9926707	12736740	8367156	10026820	12357700	7124488
EI2BE	10226950	6697320	14226470	11688700	10149050	8109146	9981790	9381255	10452570	10577770	14390800	7340256
COCH	4884213	4589820	6698989	2962385	3296663	2668552	3012702	3352577	1489163	3473221	5232170	2117427
MIC60	28701740	17702440	22214120	29548850	7576871	22491720	26505360	29106290	23144720	19115550	20162080	14119490
DHX9	109774500	120258100	153300700	153472400	79143300	96181670	172134000	141461300	187501800	115175600	142942300	70610510
FLNB	126293900	129142100	156194800	317032900	165922700	111973700	186283300	167764800	189055900	146816800	205077600	138357200
TCPE	92512790	101981900	111222600	51245670	43680480	76910290	79175720	64286780	68055890	52900490	79071030	38112130
CYB5	8244320	7105692	6707188	10266360	13620780	8883324	5238452	7187950	2531901	10897060	14857180	14573700
HNRDL	90784480	96549980	88711600	71788250	73084430	76209820	41981210	84047590	35546630	75927110	75019150	76639860
CHM4B	12287420	9232588	10327780	11562220	17100070	10881180	12073470	12489590	3415231	15089450	14429770	15725060
ENOB	406009100	481896600	588540500	217940000	237650800	291865800	247894600	252008900	212195200	258210500	367844500	218095600
S10A9	3815999	2941467	2156575	15195730	9081898	10689170	15356160	6350136	4188103	17649920	15572610	24260570
NDUFV2	5974108	5617064	5543372	8770072	8489680	8937670	8999942	8949631	8341828	15576499	12324880	15441220
HNRL1	6091319	6350875	8382199	13287280	7712050	6505641	9742306	7689163	8537771	6918039	10649340	5868596
GBF1	3999805	6282278	7797680	7235101	3316791	5475104	8040604	5583454	8438592	2455002	5749716	2806730
RHEB	10866210	12530380	15222050	11434770	10165370	14866060	18359940	10656160	14097680	10989680	12571090	7800308
SQSTM1	3272087	1552142	4067207	7185428	8875707	7363876	3455143	4823195	4192890	4903336	5081297	4940305
VA0D1	66565740	68960920	89812780	85284490	74533930	76995370	82053270	73152180	60985600	80698880	97542400	55431340
RL15	61962990	56013900	69790030	44540060	34661580	47611620	87964770	69134140	65520640	29378940	57184700	21195000
TR150	20190970	16716430	17945040	18959390	19990900	14496650	13290360	28508110	7603581	15448850	27309400	21592930
ILF3	32978790	26317160	34566190	39369860	25106600	22345530	33201540	32955990	30387210	24356580	44484930	20753670
SH3L1	12202280	11998080	12088240	8896755	11459970	10021370	7277646	7577179	3332663	8897722	15570400	8986328
SP16H	20750000	17791330	27688100	34139340	18361490	15881600	27129970	24858990	29374010	17736480	25959600	15186290
DPYL2	426960100	483828500	606912200	408104300	246518500	296909300	393453500	414744500	372702700	304419100	317183300	190882700
ACOT9	1998392	1319447	2151771	5895902	4789238	2312221	4034805	4327334	1752741	1923735	5121254	2950929
CTRB	269953900	238354800	247413300	275144500	338724900	234642200	329200000	352068400	337862500	348706800	370261200	450462700
IF4A1	428508000	515734500	657725500	343784500	351937800	395613400	495987600	323967100	385195300	413211000	546898200	296280800
TCPH	154008200	158063800	202436500	145745500	118770600	112281300	141764800	145880300	118684600	127023100	166309400	100944900
LASP1	23676850	23298690	29036710	17066740	14239750	13977010	11280320	14316710	5399816	13380620	17371270	16079780
GTPB1	5617489	4616546	4635934	7647998	4795099	2982368	4554589	5687881	1945027	4748940	6633446	4153725
ASPC1	943705,2	927577,1	918687,2	28727,93	685183,4	616129,4	558335	477827,6	648177,8	515724,3	660215,8	670626
GNAI2	117160700	125445900	171727300	152089200	132875400	122193400	129919200	121925300	123900700	110145900	137351600	101246600
RAGP1	8352883	8882768	12378700	6632091	3472008	7526195	6116935	7913574	5576060	5816124	5294901	2873604
KCD12	15441510	12965030	25454890	21446430	14468210	18921710	19734370	20881710	20780980	20404800	21088710	13151220
CAND1	80264390	99974090	318869900	83264930	55663090	292739400	97745880	200982700	136846700	61793210	102306000	37837530
TYSY	9958693	9909566	12089410	6533587	3116753	8407952	7171734	8937189	3940475	8642793	5384589	3079942
SSRP1	33053140	18173120	30967570	39744320	24884310	30611170	26147110	28597430	38823280	33229840	41354910	23054020
CC50A	12850210	11816450	15500860	11808590	17470060	15626230	12877250	10985600	7402226	18331170	20625180	13117030
SYTC	47194260	41606130	62273730	58594340	19418670	35018940	62587190	48332460	69849290	24178430	41780770	21716150
EXOC4	485708,4	833091	762114,1	939195,3	988761,3	1313649	1477731	1298613	1124837	1442953	1756463	894058,5
SCAM1	3738904	4180472	5802016	3809615	2823399	3409862	3388774	3491006	3306537	2863680	3429325	1199270
RS18	361656400	344768100	431129100	236234600	223444000	225427200	202392900	274664000	116156000	269559400	352815200	260521200
NCPR	58395560	43545970	70298760	54393330	42727480	40858040	57510800	50809460	36059420	58631210	70219840	40900010
G6PD	23961590	2056361	17204020	22042250	23082640	25046960	14359090	18852410	15535680	17682800	18038800	19642300
ANXA5	734454500	807576500	897977000	402119200	513899700	657130700	374781500	414842900	278364200	550029500	746847400	447883400
SMCA5	16413250	13351650	16444260	34835280	16949170	13504410	21486050	23887930	24168850	21969870	28594040	17793130
LTOR2	515055,4	1148117	1562303	151742,4	313615,1	1102163	695718,3	229172,4	708738,1	672640,6	556939	42578,79
RB11A	159267300	147123400	192764700	117101300	110873200	120798000	149990400	83737640	77371970	102887900	142293800	99844540
RB11B	159267300	147123400	192764700	117101300	110873200	120798000	149990400	83737640	77371970	102887900	142293800	99844540
CAPR1	8630048	3813717	6106131	15152830	3428113	7101426	1820939	6495891	2066710	9149024	14436930	11150960
PTPRN	6878586	6008989	8138313	3874004	4872355	6926407	5744946	7226146	5298862	7551582	9986789	6782531
NH2L1	10745870	10184270	17758030	2892991	3610688	11851660	6957917	5901452	2770452	7556002	8166482	4782275
1433B	722318000	844781600	852092400	508400900	560222600	501128700	591935000	405484300	232778800	509204200	703236200	512090600
VAPB	20879530	17106830	19355770	15954570	20718130	15181540	7206615	11193810	3815115	18955620	25713180	24169140
EF1G	241371300	282014000	346837300	229617400	166431000	190344000	286724100	246688000	238538100	203485600	271049300	129085900
KPRA	2769747	3939935	5571506	2038861	2081249	1638869	1567915	1806666	1378668	1357699	3356156	1481158
RAB7A	210288700	268456600	332996000	190511200	187834800	215927800	236363800	181606900	160996200	207075100	278660900	170648100
NAT10	4429373	5112131	7444421	8340016	1999243	5563651	8034850	7318954	8391693	5245578	5853557	2014033
SEP15	7637618	3504094	3620041	10807000	8493696	3394177	1545075	3349931	823714,5	5641793	14922970	13160740
KPNB1	10929130	11155280	13113010	91210400	78590150	83878150	65152630	60317280	61814930	83887730	115483500	59021720
DDX17	269279000	265850100	336412200	297484900	183117400	218871900	255174600	256300600	236683200	244903100	314679600	210297000
MMSA	6956213	3479534	5069166	9347788	4711458	6958497	8437268	6698974	4786730	7305282	8977315	6379220
ARF5	162085300	154976400	130373000	108198400	89163720	146325000	153103900	108406200	128295200	76581570	129190300	70873190
RUVB1	33282310	34511690	46933050	41748030	50141650	36850500	35826030	33904270	21883750	42885730	51061620	37720810
ALAT2	4688963	4057475	5027042	4247023	5199025	4430015	6982391	6254405	3797467	5457213	6534412	3857561
IF6	3568302	4923350	7280435	1685921	1713008	4600021	4210724	2769765	2588441	2441470	3492003	1947080
NAMPT	3478361	3047428	4882058	3569521	4853763	3596611	2881379	2417939	2404587	3326119	3567957	1658748
5NT3A	7316287	8310711	9527660	6713097	9256745	7074608	4228575	4980033	3105157	4933431	8920347	6953884
GANAB	375040000	375107600	390375100	397094700	287758600	347126900	504470800	431596100	474556200	315293800	358844200	246923200
EWS	31288430	3581148	4496543	83950840	1439987	4699941	6090236	5421880	6652534	4925335	5597953	4312186
RL30	104393800	137731800	192531200	89521960	84794110	77621790	76859210	75348100	58776360	62195620	96721650	53559090
TCPB	149289900	151514900	212150900	79804630	78068540	104236000	90421690	72225210	88083350	110222100	157655500	80188720
BIG3	1500561	1401181	2879918	3927009	1949406	2071699	2457826	3500045	3965061	2668892	3686726	1742789
NSUN2	5871077	5757322	8421543	8765105	6036770	5273996	6400591	5552941	4375267	7713142	8858653	5087426
TM9S4	23672610	28279130	27240670	60145080	35511050	35362500	51854000	44141680	36982070	18400540	35180140	24509110
UBB	708297800	363188400	480988400	738929100	525693600	320683600	258587900	286200100	283546500	401643600	483857200	404085200
UBC	708297800	363188400	480988400	738929100	525693600	320683600	258587900	286200100	283546500	401643600	483857200	404085200
RS27A	708297800	363188400	480988400	738929100	525693600	320683600	258587900	286200100	283546500	401643600	483857200	404085200
RL40	708297800	363188400	480988400	738929100	525693600	320683600	258587900	286200100	283546500	401643600	483857200	404085200
CH60	427370000	393821800	482569000	405311600	442393000	497961800	410302200	404963800	239619100	542428600	559858600	474041700
MATR3	54159960	30011210	43331590	66870920	32220580	39983480	40993340	49499800	40933210	41881400	67415040	53417200
RUVB2	28587570	23865780	35635330	25023050	19986770	23370790	20702460	19870370	18437510	35650830	47960730	31889720
RS26	137530200	140435900	178920000	221944200	112719000	77961640	176125800	186749800	98207270	95626010	140790700	95228910
CPNS1	13453450	14885190	17407690	5655475	11258090	14447400	9836450	6836827	3792105	10354690	19142880	10384800
CSK21	23683760	23498070	30596520	25893140	24691130	24312410	30577610	24500660	24649710	24949010	37050720	17922320
CSK23	23683760	23498070	30596520	25893140	24691130	24312410	30577610	24500660	24649710	24949010	37050720	17922320
PSDE	30583990	37055600	49508990	28031490	31479430	30800060	37606670	28200070	25748070	32453850	39846650	23430650
RRBP1	51645300	45949480	58717670	85748230	29390910	39546440	58788370	69489390	65782590	40347610	65494460	43033830
HS105	42610400	28218710	45902780	46952680	16940030	26565290	24288980	26720620	21553440	26492230	41183360	21590320
TBA4A	1235332000	1097401000	1612127000	837322100	668797300	831844300	1092062000	943601600	778882400	984190500	1204116000	747731900
TCPD	220989100	181475400	265906200	164876000	122195200	148113700	155013500	150314500	130103000	142500400	228296100	120470300
XPP1	3205298	4237112	6342457	2063071	1366920	2177989	5059307	3104196	2079431	2167266	4051439	1711059
MYO5A	11157920	10267040	13946220	24463620	10615310	9771230	17729650	17761130	20340360	11537990	19006750	9159608
SRP68	28919910	23411210	26068140	37744090	26632430	33686970	41256990	49777480	26419670	47928990	52776750	53629590
CSN8	10546380	12731890	17397910	3268547	6460378	8182511	3485993	4183852	2270101	11056600	13876980	8221406
RS12	122015800	117561700	159735900	66362210	128142100	89886870	49968420	59351050	34188890	117429800	163681200	113914400
TCPA	162809400	200358300	242609500	104386500	87067880	131408600	169122700	126880100	140062600	115478700	177889300	84878880
CLIC1	23717960	399880000	38422040	141681700	246858200	281616100	237559500	276644000	108244700	22383000	29454040	20628990
ANM1	9856493	13929870	12377030	12999540	9103242	88820760	8848494	61198300	28706680	4697388	11184320	6806575
ANXA7	23917010	26645590	27679190	28379260	28294970	31072850	37653530	36245940	22697820	29421130	39458010	26215870
FUBP1	71365520	63656610	78404160	115820000	46136420	48072230	75846700	87256500	68514580	63086830	81214690	58085680
ASNS	39273970	44541770	58416210	53662750	28193570	36261430	48641870	43183350	43497750	38988510	58335390	25647570
P4HA1	23780950	22816260	30523240	315301,4	20464040	21973460	19468030	24439910	17084960	21124810	27346670	16305230
H2AY	79460410	94709220	127252300	126480400	118573600	77385140	125043800	117891500	86309290	100378600	124695300	83204620
CSRP1	5237078	6219692	7714506	6548310	7208412	7986134	3829132	4686904	1911364	8872436	10099760	10134520
RL31	107311000	42747470	168122600	163704900	12975010	81916620	31187110	102993000	66669170	118826200	172002500	81368120
PPIB	115280600	118640800	142688600	106007700	95484060	116813100	87810950	89920430	57428330	78963110	131319400	100851700
FUBP2	84111470	76223960	106001800	157407100	72104620	69002340	108066800	113838900	143456800	85008050	112663800	79698330
H2A1B	5877268000	5540262000	7377115000	3402591000	4192377000	3283661000	2896363000	3849171000	1550169000	4151108000	4490179000	3516658000
H2A3	5877268000	5540262000	7377115000	3402591000	4192377000	3283661000	2896363000	3849171000	1550169000	4151108000	4490179000	3516658000
H2A1C	5877268000	5540262000	7377115000	3402591000	4192377000	3283661000	2896363000	3849171000	1550169000	4151108000	4490179000	3516658000
K22E	3474479000	3568874000	1412955000	11762960000	7568124000	4891120000	15653500000	4970845000	6205722000	3494642000	2935518000	3959967000
IPYR	2413594	7854029	16120320	5870703	6184154	6596137	4530847	4179279	4597410	5581137	11078500	6442704
IDH3G	57362670	45640300	74504310	63298370	21748030	78654540	69252960	76279970	66776270	82495630	92348790	64259050
PCNA	50853820	67220280	90693130	33760840	31324730	53264060	36926410	36303730	36577160	44605100	66560770	29708440
CALL3	1922443	1287157	172018,1	5291908	3078681	3999801	11221430	5454811	951801	3851974	2342281	6741060
C1TM	20951270	20084240	28696660	48773700	33718720	24329210	32571800	35236190	25101750	29051410	43237770	26331380
SAHH	85589640	113579400	128207100	96017600	82998040	77486400	100200200	78796390	84540890	69923100	106802300	62698060
ARF3	230626100	234663300	187772100	153399700	149265900	211611200	227543400	155195700	183737300	110603300	189876800	96660290
ARF1	230626100	234663300	187772100	153399700	149265900	211611200	227543400	155195700	183737300	110603300	189876800	96660290
DC1L1	16604830	15844160	19328120	21188130	13559230	10186950	16153420	18594820	8656554	16855820	23735700	15958860
HORN	1362943	613810	959856,6	8649970	6023886	3533254	4868713	467579,6	6044059	657296,7	2622785	622122,9
FAF2	6851405	6154573	8634863	5063942	5534127	6558412	7136866	5558907	5586440	5140944	6883519	2928870
CBR1	19258430	13248150	24011370	74403750	62490660	86446100	60973010	31921070	29289440	55179400	65574760	39146920
ME1	16950440	18582920	11093670	24526660	24583950	29303110	20254850	21612780	26055210	16114200	17747700	18147380
FMR1	39660890	43804390	45884640	51679340	38993650	29619200	37795180	43854490	36323110	38924740	51072550	32428850
SRP72	26485550	26357500	36184950	29930390	24157730	29451290	29479730	24517130	18483380	30850490	39225010	23188540
RL11	100257700	93896430	131454500	84238740	94682290	70169440	80691880	79254860	49716850	100912400	125255700	99519050
WASC5	901412,6	912224,2	2421778	216524,4	390455,3	857242,2	1632046	742261,3	2414702	497976,5	969330	304614
SPTN1	75600520	75962540	90583660	82893310	78974380	55750130	68065750	61503170	38498510	65774140	112212000	72081350
PSMD6	26315020	28648400	34073580	89701120	28216080	30510770	36061400	28978550	26981350	35944910	42745310	26476210
NNTM	17527540	12024420	19810180	40324270	17543730	23287870	42268660	35022050	37392370	36316730	30335040	38121510
MTAP	8224701	7630946	8844026	12193720	12635570	7858135	5629974	7835183	3874238	8594881	13902480	9841311
DCTN2	26180430	30107510	37349370	12270450	13627080	16480480	10789660	10019820	6778548	17285250	23009820	18622160
SUCA	39106970	27745920	38244760	72469630	49278010	41930490	50452400	51241110	33440070	60709620	58767780	55114180
SPTB2	62540340	58628120	74758910	94859290	56045460	45633590	57229300	69177420	61557420	52371010	87945260	51780950
UBQL2	28254770	30777040	39390570	6517946	3648143	13654320	12004220	16055350	4769543	11254640	12866940	4126859
KPRB	4712353	5856012	8901992	3433492	2441768	3826463	4239378	3900046	2132673	2629786	5965629	1472126
TMED9	74711400	57858570	64095780	49740550	68674250	89733630	59378170	59657530	30754850	71429020	68532260	53099860
CND3	10828610	11556760	16160010	7110999	8142880	10929880	9004452	9923634	9121671	11791480	13993410	9560197
GCN1	28046540	32632040	47945620	53876930	42786210	43044800	72565100	55798500	64963550	50854830	65588150	32530300
CBX5	11380730	12544610	12922360	6893298	4401140	8486835	2891597	4152389	2882357	12245220	14234420	8745024
NUCB1	30411910	25198090	33149450	45603730	21996730	32045450	16708050	26927490	9270283	38048830	63425130	53661860
AP2M1	22657310	26033220	42958680	28691090	17684540	16877010	34354680	22784470	31659320	16372720	30680720	10203170
FA9	45127110	9596321	18561470	40900060	54986470	49251450	64755610	39727310	10406980	93785160	68978940	82344420
PRDX5	26593940	28345250	12897950	76537950	92223250	65066630	58232100	45705940	49339700	77031730	63676460	47850380
EFTU	69632590	31293580	41877080	128299200	49369700	71966680	75759730	67443100	66482110	103625300	108741700	94297400
SMRC2	12853520	9542956	12995880	19268560	10624870	6612620	14116760	13760730	14974800	8046645	15942820	8950181
ELAV4	26007930	33293020	40839520	28576050	30373830	33689380	24655560	36201000	22530820	31874910	50939380	34789340
K1C14	785167500	789241900	431691800	1564886000	840955900	1192276000	5459382000	848423500	2317755000	1061794000	560266900	496594600
FXR2	40376460	43780350	49113320	63271970	40722610	31124850	38891840	47786220	37284550	42910690	56770000	37221850
RBP2	1403396	1233022	1717415	1903657	1712025	1205925	2132562	1853249	2176910	1732384	2082614	1314848
EIF3B	26081450	47978160	63825480	46326720	24605150	31985270	52638030	36945870	57487060	26063880	36434750	14722680
K2C78	176155200	209135600	99960150	691978600	577035900	321126200	1552537000	301022200	468328200	328166500	185296000	311013200
PKP1	2322437	2615007	993990,3	12519380	3985225	3336441	113565000	3125413	9928985	4549456	2445360	2481631
BZW1	17698900	17558210	21484760	15639550	16034620	12887900	10602010	7735592	6161395	14594730	23049850	11948500
UFM1	17015830	20859730	35197760	10157150	11138700	11739170	8446054	9393923	5587428	9110101	22478830	11459040
DESP	28035550	32925750	14967330	197197700	113354700	59337830	1257863000	77029270	150664800	61585880	57650460	58691050
RFA1	5779895	4615385	7142471	5871406	2593382	10962010	27385010	6115706	24554980	4472647	6357293	1561327
HBA	146841600	30325580	78371450	142162000	70261180	184896500	90066570	91468950	72587010	189791400	168832900	158822000
SEC13	31033270	39172500	53062150	27694730	23222480	32340420	36137580	30421060	34048000	33611240	44434060	21638230
RPN2	104011900	94599680	103614600	162769700	96879590	112673700	119804000	110990100	92445470	98459910	146143200	102290500
PCCA	12565510	8125768	11366740	24783010	6631749	15678240	26131870	21454890	20870640	19460400	25633270	18143150
TSP1	25276790	5686264	6912709	16846570	25268240	17274780	25947350	20541270	2357956	33326810	26012420	39417260
CSN3	3098757	3561836	5396076	2799731	1907348	3877893	2532660	2742843	2167587	3794995	4465346	1516410
VAT1	10765670	9658072	11394190	18399370	18292270	7621610	13729200	10798790	6139077	10800560	17756810	13026750
ODP2	104952100	37915970	89366200	225071100	62684910	104521400	88341370	124907700	130146700	117139600	134748900	106602200
PDS5A	2289118	2063939	3679366	4259548	3020917	2995751	3691331	4483740	2887111	3305699	6087214	1829677
PSD11	17815920	19307950	28153630	12418810	17694200	17023450	14975080	12934150	11435350	18351820	27983520	11512020
F10A1	78279600	79727820	96474210	55772660	45419640	53306120	35682550	41594030	19305020	65890870	75235430	49662520
F10A5	78279600	79727820	96474210	55772660	45419640	53306120	35682550	41594030	19305020	65890870	75235430	49662520
RAD21	1525555	1108809	1362334	3267549	2440945	716791,6	783805,7	1524276	1211048	2262661	2853808	1819694
UCHL3	3717410	5533459	10099030	2124556	2481806	4584244	3105027	883943,5	1032816	3984534	6141403	1489395
VWA8	7402494	6767706	7772362	20617510	12291500	9759500	23757910	18285500	16912010	13610000	10811160	6284044
CBPE	55417280	49904000	67734890	13136290	12094960	48864500	28355590	23442640	28000510	48222420	47413170	22012050
VPS52	1113272	1335102	1778764	2272248	1261280	756188,7	969475,8	1204734	982216,1	1450273	2280657	1275034
APOE	24607550	4242111	9716977	18989350	9961219	29148060	7630502	5848443	3989130	40582860	33336950	36042800
CTNB1	23990840	27086930	31068620	32902950	23281990	25536860	214670200	36001900	48566630	20920560	22551360	11796480
MYO6	4431124	6596898	9264564	10430450	7143435	6369499	12493260	7409764	11824180	3640276	8151638	5059696
LEMD2	7648704	5585079	8207588	8327124	7040451	10036870	7446923	9936444	4181184	14218710	14928000	13285480
CSN7A	16956480	19143950	21943680	12851700	12339490	16806290	10023710	10552400	8456400	14047630	23871840	9108761
PSPC1	8561304	8586562	12525510	22743080	11949640	11640050	17063050	19009770	23010980	14531870	22269680	10969730
COPG1	51422760	64440270	84871800	58337120	48090710	52260090	70333040	52004290	77958650	45511150	70418350	32737150
H10	40485440	40425210	42234980	430678700	432384400	441461400	171073100	149477200	180992600	389448300	303135500	346796100
RS10	66499560	68514660	54155200	16334760	33296490	52018800	49349860	57340310	22692620	41498140	47104180	29758030
FA98A	2941955	2847792	3387324	4700571	3036760	2007598	3845973	2711710	3142300	1173435	3710657	1918022
RS5	47831680	49259350	61089950	23253740	12307150	34508090	24508300	33040660	11994070	17597480	22273000	18235940
SYFA	6142246	6203569	8699602	1166658	1748122	5953602	6635945	5245065	5967968	5003639	9559210	3520274
COR1C	34901710	38756760	45523190	30054240	20981380	31954100	36448720	34549040	37319080	30423930	38939230	19901350
TLN1	41038600	42202950	55237590	115828200	58274440	79860990	42280270	28224850	33178840	34002390	38099120	31153370
ODPA	58848230	54543980	62794370	90833840	63995720	79844680	87410020	89160680	54276400	65275140	79304040	54234940
RAP1B	134557900	161499400	136551300	127147900	117872900	96335760	129374000	169123100	136118700	147714500	176136600	118060500
RTCB	61839090	70350650	87311030	62222190	39461130	54295060	76189490	60781710	50106210	52712120	60210160	35173690
DYST	2513382	6030808	11583990	7446612	5409833	3739693	9318685	5646224	14927280	4260942	5467409	1980409
EDC4	3510008	4806474	6167879	4115687	1813150	4576173	6426490	4763159	5985719	2050265	4522776	1157792
PAIP1	16938680	17808680	20235510	12421050	11946430	13978730	9901638	6297036	8866301	8472199	22610620	9512838
NACAM	72887450	56842350	54034750	62989370	63189150	51271450	38462100	48777820	20977440	60137480	88815980	66976510
AFAD	1405028	700918,2	1143671	2648383	1590331	1145834	1478829	1318421	1298283	3803188	4178375	2957361
NFM	119242000	129321400	141688900	195206400	110831100	74775570	127135300	155889100	141034500	95973640	151503500	97915710
RU2A	25146330	23613010	21551220	19366080	17964790	13624010	5283084	13307730	3718108	17789840	25632760	21023280
ARP2	17352810	15769980	23387370	15836210	18463010	10159440	20404600	14908280	13562390	12868520	21177830	9124787
RNPS1	9601907	7400382	11203260	11254710	5108865	5277553	12050290	11010020	11469200	6611371	7529170	4406183
AP1M1	18805700	18122490	29680400	16962400	12279630	13288660	26124530	17997470	23214630	13787620	24759400	8703376
UBR4	8783593	9251005	11409080	20039600	6616658	8669318	17073320	10449910	21778710	7936519	16855650	7906851
GDAP1	1661313	1278218	395800,2	9316475	5991604	772804,5	1739472	5454883	1060561	1282982	2966750	3629867
IDHC	38432970	48995640	59238690	61761740	72847290	35609990	39647000	49685480	33737200	30369960	41682300	42583460
F91A1	3157729	2902982	3790723	4087685	2426825	2937794	3566653	2559285	3461841	3175220	5107900	1891319
COX5B	22464640	17558490	17080710	37099650	58855790	24482050	19516010	34661650	9104402	31854480	36684060	46989760
TOLIP	8564153	12002570	16303730	7263405	7453123	5530586	11320320	8249156	3453629	9021770	10209280	7082963
CPSF6	6116726	7129472	9461194	11100470	8264876	6313914	13187050	10539070	14897780	7851166	9967860	6136550
ANM5	13611770	15987800	15498830	18849050	15209920	13938040	17913840	15883680	18336670	13480330	20610720	9022711
BAG6	24140390	25375450	32340660	29551600	16795980	18918910	26010670	25535430	34460800	24672430	30753330	18984620
ZO1	1972252	1781756	1370634	5334353	1602531	1055038	2308259	3160337	2416582	1422483	2432509	1422119
FLNA	28734500	33059960	38836930	65883850	36351640	32494180	56979760	44958520	47148890	40826250	53667110	33800310
OSBP1	5274043	4364951	6051928	12202160	4583756	4238541	6323398	9653821	8156266	5477864	8916107	6970388
CDV3	1842345	1976069	2027214	19376,24	239970,8	676021,2	790084,6	2435904	198326,8	1386400	1338781	239291
CKAP5	12592140	6495542	8914522	50081790	7810970	7809726	9539478	10167800	11158490	7936937	13167430	8615402
HNRPC	57316710	68075020	87283050	29149910	24919710	58427050	52087210	38357760	31669440	44289110	51301460	36510280
RSMB	24945690	27922440	38125900	41004640	21539340	22160670	45359090	38455000	53525700	20205230	26663970	16748250
RSMN	24945690	27922440	38125900	41004640	21539340	22160670	45359090	38455000	53525700	20205230	26663970	16748250
STML2	1100975	300068,3	41495,59	2359966	2081510	1014918	778792,6	2900863	345443,7	335041,7	1436434	2754631
ACTZ	51766850	59454820	70250460	48727930	49807930	35515540	44115130	42911730	32757540	45750330	64152460	38816550
DHX15	47005550	46006020	58615960	69042130	39008890	45825580	74612450	54204940	84297670	54536130	66309560	31511660
DAD1	2201038	6535998	10084000	10586210	8800892	7261906	19539610	9865718	11900160	10752130	11451500	5653041
PDXD1	4879202	6517846	10595380	2637203	2934255	4352929	5386806	3877153	6309161	5412174	6515892	2403036
SPCS2	15431340	14361600	20254210	10889860	20467360	16487130	20490790	12199450	13762650	12238250	41188650	4552419
NDKA	553427900	735602100	942839400	311263900	419149400	501734300	274495200	274962100	232039800	381751200	552171500	359058600
SYSC	107626800	94249060	119552500	104521600	78262250	68558900	72311700	86626200	56143690	82610650	126758400	73380480
PGRC2	44293050	33623310	47203590	41829650	15106150	56407030	35948180	39650310	18584760	59783360	34835250	27504180
ZW10	3178356	5070368	6175353	6490851	4508239	6045738	7064315	3541573	7273284	4017790	5465902	1512043
SRP54	24054300	10961990	16626500	21937760	8344633	13062830	9601812	12714800	10609870	26192740	25482270	19421210
RS13	351733800	391119100	477767300	283727100	281449800	217470100	331802600	333449700	206066200	249262500	344009600	242134200
PLXB2	6247562	11962690	7982216	19381920	12176750	12347090	6363627	13013230	9784413	13445830	17467580	10956120
AAK1	3738498	4917861	6174391	6773898	2868699	2506482	5738314	5789213	6957978	2260933	4003250	1838505
SCAM3	12767890	13416600	15256770	18395790	11033020	7292876	9039608	12620810	7709332	11036790	14253660	9723295
KS6A3	7227813	9667058	11975820	11614950	10933580	11477450	11247490	11419440	7565441	13259790	17663100	9914790
PIMT	4805915	5420107	6624501	1593635	2191638	2472026	2539256	1859856	1818609	4232630	5702839	3046341
ATP4A	34178380	40669930	69553730	61233590	42682470	52135440	84595760	53856410	75901680	58706320	66958340	31615520
EIF3F	19437700	20725110	30112640	19349840	7557346	11148930	30134800	21574160	18848430	14458110	19418730	7282522
MDHC	687925800	744340800	973016200	389523100	312767200	434553700	324908900	396890700	294776500	439930400	592226200	367613600
SART3	1769558	1937199	2865221	371895,8	563668,5	1289049	2083213	1720999	2095682	1768761	2223940	242628,4
METK2	25046830	28666150	38963260	34606550	32109830	29712230	34548470	32182680	33875100	44846110	63282040	26733910
RAB14	233605200	280366600	316452100	155577600	214838600	214209200	299997400	190296700	241989100	223029300	274271700	157826900
ELOC	2377503	2301674	2846879	598437,8	1212878	1571441	1407916	918970,7	614300,8	1572601	2132982	815054,6
H1.5	499914700	416715500	479522500	708028800	795232200	570530700	340758600	501332300	268959900	559426000	512379600	589141400
AL1L2	57797620	46919550	52124790	144482000	73008230	76790890	121021600	125447800	83430480	73105370	93010520	61552820
PRPS1	78784620	66287790	106836800	55047540	39866780	64302660	39687500	45683420	43308800	50872140	74862490	36731700
RS7	156404500	153924000	107421100	150106100	110345400	125461300	116559400	145135200	78394170	84205260	86170480	87327710
CO3	8457199	5308062	6344505	87615160	109191300	95899380	104642600	68904830	46765050	77148620	91193880	87049430
ARP3	34385510	31738960	39990110	38244260	27833740	19773500	44411090	29580660	35252370	27370700	38896970	20472490
PSB5	48043110	48668100	57410490	42884270	16991870	32226630	46748780	22160670	39243840	24617800	40391130	14391210
ACACA	998204,3	1253758	2075713	1989768	1049266	959210,8	2238495	806974,6	1819628	1425591	1710493	649974,4
NDRG1	10402000	8900419	11551100	4161339	4566356	4278841	5512447	4949996	2096591	5894996	6737212	4896015
CAT	950888	1384222	505614,2	13542920	3156263	4987026	7148504	3131111	3263365	2877402	2277451	2211852
PSMD7	9635491	10418520	13651980	6925418	3633416	8056476	13905590	8863488	7885853	11510940	14978750	6064140
STX7	21647900	20348720	21412950	22858610	23677910	18797340	9640083	14174110	7214136	27900680	29345640	28737870
RS17	32597270	33259620	43821610	27883560	49257190	28141980	21726170	33276100	11390250	36932770	49596310	37494280
ATLA2	1067572	912051	1476689	297411,8	571985,8	523349,7	1000167	1105956	619842,2	1173934	1619506	677583,2
FABP5	29368040	37030220	37342520	14789580	17297530	26212160	255749600	19359530	15146300	11653610	17800630	12496990
MTREX	10719850	11181840	17316080	20148270	9134299	9794807	15012700	12177170	14922970	9262225	13543920	5300026
XPO5	3396668	2911045	4300573	4478185	4759588	4231761	6107117	4203808	4452598	5075515	6323905	3211671
CLIC6	1749758	374316800	2324940	121864800	229000100	259453000	202921100	261036500	92803550	2697504	2695932	2857721
CLIC5	1749758	374316800	2324940	121864800	229000100	259453000	202921100	261036500	92803550	2697504	2695932	2857721
PRP19	3408484	2748317	5101292	6275667	2329071	3607673	3817550	4776178	7810335	3478567	3617796	1891473
PPP5	7416349	8118563	9942196	13250840	8851866	6690367	6936452	7555919	9524951	7817602	12751890	7861940
MYO1C	1447443	855075,5	829135,2	3191781	1540527	1450680	1248841	1285238	1745508	929666,2	2799984	1239719
JUPI2	18957040	17290280	14684130	25619230	14422210	11906360	18320190	22148540	6277603	11234620	21539530	15838800
GUAA	17254970	15429610	22720060	18124840	10905100	14236490	15310570	17312520	13727720	14047890	18419760	11622600
ARLY	1814208	1486131	1612358	2114108	934405,3	1632639	833577,8	1284933	1152214	470230,5	1850716	851807,1
DBNL	13273320	13868280	17746940	10013490	10261030	11022650	8938455	8260884	5118483	13973360	18126090	11568300
SNX12	5296291	6525422	7267585	6902576	7357047	4351787	3478858	3763931	2279417	7733010	12742110	7511822
SKP1	24112790	29247050	29126430	21199350	26559480	20483550	11563570	14404820	6120636	24266670	38081060	24552850
TNPO1	26631370	27186170	40297270	27268290	32544700	26713080	25789210	25928670	24117690	30633060	43150130	26722640
CSDE1	15878760	17773640	23331200	18170600	13649020	14167750	19288200	17257410	12389580	12462810	20230110	12270060
GLYR1	1310219	1459077	2092683	3434412	1170578	1546377	1424673	1662970	1772443	2464676	2995399	1866197
GDIB	140068200	49415250	71326670	118626700	18578430	28532880	32664800	25512450	38426470	23594870	37193940	14935740
NMT2	5032642	6314171	8289304	4812716	2763950	4080577	6158480	6494059	4581074	4511493	5209830	2702469
MLEC	49004460	46250330	48342540	38865590	35090910	58858440	64808170	45337440	57600470	41563300	59321800	32108740
TGM3	4473492	4951225	3140197	14686870	8496839	5956015	76403270	6062788	9348907	8511891	6210930	6528761
TOP1	11751920	9049041	13027880	16105390	11349160	9785079	13820080	12535060	14709790	9703576	17207690	10961340
IPO7	22376320	27658750	34488930	20190770	16127720	17218710	21798260	17312710	19908170	14477200	23896590	11695820
PSMD2	38260980	41853770	55026390	23499100	26617930	44004680	49356360	35477500	52225220	37191250	50658940	18656290
STRN	5388675	12473470	12644160	6908528	19555170	14998220	235745900	277050100	6330922	484038900	448660100	513704500
RL7	165653000	182826900	255132600	112703900	115908800	132155500	197460300	168291700	147659700	146591000	192112200	112407600
PEBP1	92725120	78966050	62411720	41156060	86799860	53666640	26136550	43613530	14262750	31201770	70097370	45243950
PLOD2	3690606	3952578	6292122	1791933	3336196	2379046	2479183	2269087	2215617	2214450	3096332	927484,4
DJC13	5549698	5841589	5761882	14899280	7881222	5508599	12408860	8302803	11340460	8333270	12032680	5775759
DD19A	13497000	13523090	12132320	18891940	14687580	9320199	12451130	13250240	11010530	8515209	11912450	8078141
PLAK	29415770	35076190	31327170	93254200	43170550	49438970	841964800	61645960	123138500	50261920	36822030	27537000
TXD12	56991960	43450500	59688590	27420030	32983610	52339390	17533080	24242440	20134920	52282420	63981880	47103770
LYPA1	4062825	4927590	4831660	536190,5	623249,6	4791967	4973760	2793434	2758215	3841352	2688548	815167,4
DCTN1	20788440	17575700	21599000	39188340	13724750	11392800	20139800	16801590	18464940	15042530	19992630	13248150
ODR4	1231500	1418550	2035772	1596966	2798275	1615154	2500896	2303444	3043105	1782602	2593607	1117329
FINC	2264988	1680738	2836300	6083593	9523801	5012767	5915562	3902260	2681057	11287900	11224380	13105310
1433G	837848200	934941000	992576900	597035300	642224400	599119600	635326000	463474800	281679800	620094100	870964700	617890700
LETM1	11313860	8904524	13809450	24640510	13198700	15362720	21918810	17867240	9163943	16491070	23158420	13644040
NU155	1552394	1690995	1197475	1564641	1623740	1780954	4156139	2740543	4058139	1843551	1905541	1240709
CTNA2	3399291	2999573	3195105	2640256	2350597	1808869	3245859	2371647	763015,8	2576690	4448776	2740682
ENPLL	975118800	912820400	1136558000	1047298000	641204200	586289600	751202800	810548800	617124600	779743100	978065400	772905500
RFC2	13787590	9175914	10546900	26304040	15211580	10818520	6964757	11068600	5211724	17553640	22274370	23388500
SERA	214402700	259582400	338887100	184427300	160357600	150478400	173160600	167310500	136547100	164708100	220670500	156844000
STT3A	63029220	50257900	64600230	78990420	43727510	141791600	105330600	72689180	96897880	45295840	60597070	32859230
CTBP1	2477074	2298308	2586739	4739922	4661290	1819564	1703020	1636834	2124423	1624011	3903126	2175111
CALD1	21995350	17579730	8892702	31195810	35906570	33308520	14154120	20726750	4416470	37229940	38940980	54319150
ZFR	908475	712539,5	998685,5	371304,6	260483,1	632739,2	1246148	636252,3	1619433	1027324	1477779	481228,8
PUR2	6247919	7175476	11076670	6716871	5674115	8030291	6919756	6640514	9014651	9545670	12317450	6836137
MCCB	4117124	1725044	2407853	5610567	4279574	3478174	4075383	4038790	2538475	4267188	4454387	3995100
ASNA	35585640	43769580	63392270	39911810	43044940	37037660	28809210	26978920	24515080	45097740	70338290	38130970
FA10	101023200	31967860	82797800	146166300	234925800	205681500	158647700	125001200	69080580	297924200	243605100	311537400
TBB2A	1592214000	1607377000	1947692000	1025784000	917474600	1278467000	1241562000	1022503000	793001300	1149815000	1427338000	928897900
EPS15	589781,8	841577,5	494160,7	939761,6	578396,5	578396,5	620011	1406447	494819,2	1076975	1284562	826886,9
STK24	6177035	7080646	9422185	3316518	4390030	5962446	5891301	4922377	4968319	6044118	8248929	4699369
LTOR1	1567184	1987333	3441690	1054771	762642,3	1394687	991552	1082083	370845	2535395	2505120	2203134
K2C6B	1430218000	1460467000	620422300	4676346000	3298093000	1940827000	7739704000	2308505000	3256618000	1864667000	1465453000	1854739000
ACTY	53733790	60938340	73631560	56510300	54986950	36820370	45114830	43112390	35360370	47633310	69138850	42949580
PSB4	30493830	42867740	55380170	23987650	25065290	16092250	32195550	19926140	21603790	23272870	40542470	21177650
KTN1	524942,6	398194,5	356602,7	318307,4	769744	1095832	525747,3	622096,9	369202	477549,1	540079,4	1208454
AT1B1	79180930	52912520	67773500	109457300	119638100	81704190	64767060	74576330	39256460	100080000	120039400	109519300
PPM1G	5349838	5076440	6056641	4087505	1406476	3031713	1937067	2524096	1099398	3629648	3557310	1490046
STXB1	23790590	34036680	48607120	30557270	15565650	26226180	21207380	27000170	31817040	22900790	33256270	19714400
UBE2K	23430110	28267930	25113820	21213860	26601270	17746980	12011550	16013520	7359891	17409820	30627340	15786630
YMEL1	1620472	1066177	1688208	1256751	1078620	1301942	1642030	1117382	1291819	874642,6	1669230	784169
DSC1	986428,8	631885,9	39194,45	11031000	8957426	2611733	43049190	3461412	5482003	1242237	1390078	1347251
PSD12	30731960	36793660	39295270	17332230	29547940	33619610	38626720	25756180	31405620	29043790	44427720	22642570
CTND1	4262126	5539818	8912642	5101903	3053319	3784663	5645139	4709601	2392305	4263329	6860672	5047550
ACADS	16499400	14197370	17586490	29488470	23557640	21243880	31748190	25302610	20094520	32500560	34989460	24291170
TPR	11066950	10387560	11104240	16187040	11916730	9814119	10999420	14947290	9025228	7448419	16476790	11360100
IF4A3	28785490	31410240	44040690	24245340	18638220	21366340	36071700	25450590	26517380	23402040	35431760	16515050
CTNA1	17457060	16800480	21231680	11956320	8175615	11639800	19743410	12627460	5601113	15321350	20224740	12524660
SGTA	6972386	7523783	11090640	5449621	3938979	6150918	4998774	4288992	2804389	6492155	9247481	4576193
SRSF6	131547200	148968300	189341800	202285800	125154500	118991700	149783400	158763700	128609500	116990200	142133600	98651440
TPD52	13693250	17405440	22978870	5812153	4895456	10228640	3484929	3392672	3174509	6161835	12073980	11332960
ACADV	19219710	19187660	29005290	19091390	10902990	21634880	43856600	26060500	25133410	29666460	27453710	17543040
FXR1	43219880	45934650	51817800	61485280	40815540	34442760	40824590	47921250	39631160	43910280	60692150	37423830
RL27A	41926580	37644310	28508680	74810230	78394260	26417930	28652740	60837000	19408630	32170280	47891480	57008360
VPS29	2938988	3264419	3944952	3075134	3664087	3061006	3142256	1264784	1693239	2771167	5744416	2095208
OLA1	22851830	25610280	36065990	18922910	19114360	17832340	22089180	23132400	16148110	22331800	32843390	17920540
RAB6A	273717500	330478400	379703700	191034500	254153500	265748500	339672400	219827500	273156100	260591000	316323600	188716700
NELFE	28684,5	73074,72	38086,41	84756,32	84756,32	84756,32	14496,16	14468,38	14468,38	156259,1	156259,1	64790,39
ACDSB	21543740	7972126	16700010	27604810	10915500	16402790	16044510	9286389	19553820	29074350	30014440	19062860
CSN4	30367000	14107480	33187690	24359300	9822010	20753780	6150999	9433664	12731190	32405750	41044190	23336320
ABCF3	933654,6	865043,5	1215624	3169556	3055117	659862,2	1231997	2038920	1429420	1903885	3030814	2530350
RCC2	41571240	39471400	48322750	70522640	55650010	50159160	73999270	58855990	74558650	71858830	93888290	50734870
PSMD1	20431010	22960330	20622010	17623990	5587888	13876060	20287860	13362740	19478350	6142853	11442630	3375473
VDAC3	123282200	122310900	153880400	152710700	103132900	194488000	212786800	140798700	145096300	167124300	219999400	132221400
RS15	16841960	17065540	26188200	13338670	12891990	13315010	15170110	14571420	4982144	12753150	18276890	10555890
NUDC2	314287,3	44475,6	195719,7	427665,7	283379,4	427665,7	42688,89	11459,08	26929,26	368376	667132,5	416607,1
MTA2	13105240	11766860	15817650	22031630	13994030	8110517	16841520	14118340	12622370	14022460	18965510	12378900
ADA10	8951429	10896840	15079360	11037500	10855120	11691230	16900050	16719630	8971866	14199470	18304520	11797290
COPZ1	34805160	40213600	37020550	17863580	31389420	29527280	23010450	27397280	15977900	20590880	47125800	23698460
RL23	154012300	179974500	228642800	165806200	121300700	145293000	142253800	168131100	115709400	156964600	149856100	135961600
ERP44	118537400	128468300	153960500	126582900	136453600	135738700	114979000	114649400	75601760	171990000	190977400	165631900
CO6A1	1639573	1465710	1708252	1301023	4475669	4721048	2061318	2838240	1990690	4293916	5398962	3961424
SAHH3	23275780	28950440	37161210	48353480	56690900	23876290	34335040	28919530	31789600	68212540	45646010	25818160
ASPG	31898190	19936190	24988510	23686830	9848034	33280230	17363640	18877450	11060780	30542680	24242040	17036200
AIP	1546886	2838618	4096167	2793854	2931402	2459732	829266,3	2337248	817601	3121709	5368331	3158117
TEBP	214051700	213839800	301605200	37866170	74295110	173709800	129525200	132131100	81645360	217136000	217551700	159821900
CAZA2	37745790	46724610	65014360	27176150	23376790	25733820	37947990	29346030	28475010	35162680	47220020	22990680
RAB5C	22541810	21670710	30230270	23978460	21143960	23705560	30318090	11277690	27303050	33253270	41462210	19327820
SRRT	17784980	16317430	18707470	30937290	16172670	15488800	21723550	20450420	19968260	19258300	25783910	18744620
MAOM	10740380	7930909	11333240	15198650	8523759	14137470	14709040	12941180	14057570	9957512	18208370	6043435
MESD	11625840	8788966	1463759	1299170	409139,3	10955010	10947230	17306290	5590766	101860,2	97976,9	264868,5
FKBP4	8398228	9896290	14478920	10654380	9168965	9550377	8237652	7479651	8317055	8774628	14618000	6687826
IF4H	16793330	23364890	18403070	9102532	16965290	13144340	10660960	5428379	2790414	15013330	18778020	12193960
SRSF1	89460350	67754980	42538040	85797290	84966900	54578660	34217360	43104340	19348780	71274530	119109900	100754900
PGP	50006190	53382850	75796000	41499460	34587330	35416820	25523090	31464540	26494100	45921430	53909240	35172180
SE6L2	25132720	20362130	19003820	26678490	20717280	28708890	19860620	26077790	11431080	27558590	38583060	33018900
ACAD8	2940457	1539697	2397293	2158465	1060614	3502501	4214327	3915492	3258510	2039838	4148106	3841419
K2C1B	1902007000	2165898000	868218700	6211203000	4297566000	2648630000	6237021000	2736136000	4020045000	2052934000	1842970000	2238635000
IGF2	3320832	4622871	2156087	2224895	3078647	2350112,5	9129136	3407556	4616236	3493986	13096350	1299243
EIF3J	15243190	13126110	15140860	11083950	11786060	11969600	4376406	7447373	2241025	13904000	18151660	12853490
VPS51	2111739	4487059	4767507	3857493	3854555	3422679	3705560	4612776	4251087	3612267	3571904	2562848
TPPC4	3801718	3498777	4655531	6549137	4880321	4075052	2186204	2148874	2490494	5861364	7833291	3733477
SYT2	4269475	2439785	2803546	5036113	4670989	1439843	2570180	2731537	1143752	4312285	6266268	4292765
K1C15	415132700	392810400	231427600	778080600	463942200	558102100	3098652000	312776100	1268670000	675473000	385427100	321212900
HID1	6134327	9440109	13608550	4571944	3388350	6426314	10156410	6764838	9804577	4473433	9232091	1682683
HSPA1A	141742900	642385200	166671300	891449100	962348700	803498200	539985200	485047600	425553300	391111300	577695200	348203300
CUL4A	2376613	1950926	2501332	2769482	1402294	924733,9	2863060	2189654	2171408	512650,3	756842,4	433721,4
ABCF2	7255267	6013451	8797839	5967922	4585231	6233563	9291070	5909505	6139630	7489463	9991451	4257729
PGD	467991	436495	778449	4452742	4790029	4363251	2503516	2330703	2542549	2972616	2770835	2891376
RL10	110501100	69726610	84130590	71820490	30633120	65202650	83688100	71805430	70745610	58071840	62859560	36212770
SYMPK	577664,7	567972,5	1072373	665770,7	865733,3	546191,9	890081	210089,7	438328,7	814980,3	1570417	473659,8
PSIP1	20556270	21034690	19582780	34245540	22540490	17847730	22389890	30512580	16660130	18623510	21581980	24408730
DCTN4	6590433	7136913	8644890	8403532	5973828	3611727	6889538	6182633	3456600	5441710	7941836	4514480
AK1A1	77571440	82427360	105892000	91290960	76707380	63532950	66264140	65667920	52379750	67174170	104888300	70729770
SRS10	11900840	10125860	6136934	10164960	8831509	9234534	6383340	10184830	2492122	7141945	15515210	10778540
ERF1	41318740	55988870	71739950	28711790	38659940	39934690	43016210	39787070	46936340	42267640	59341410	29534020
EZRI	95227030	100489300	131047800	74444780	37052100	63672620	166758800	90726990	107481300	55952060	93601530	34076760
UBE3C	2123821	1525585	2499784	2453682	1593063	1623633	4426213	2507313	2980679	1925692	3197460	1510737
IF4A2	372849200	434584200	551528100	280091500	313537300	326453000	392964000	283051300	314382600	372347600	473422700	266562700
SAHH2	24684490	31225450	38894830	35917050	26476150	28745450	50514150	25996970	36008420	31712730	44244200	23184370
SPF27	2229324	2768336	2682644	2819549	2532596	1623089	1040920	1295485	1487107	1576036	1156999	1867433
RL32	21398050	17646330	25629130	29812450	23196030	18062040	20627790	23757550	15997040	23137880	31011500	22661590
GORS2	28920960	22187310	35518660	20173770	17361390	24350590	14565900	18393770	17440430	23139410	34193060	12125090
GNPI1	13699060	13542570	19832110	5436497	6929434	8522945	7301409	5116752	5118618	4364788	11581930	4166396
DNAJB1	947162,9	923713	550631,4	2409305	2515748	2435577	1458265	1303644	1116997	2168082	1777469	1983275
SNX3	64406530	73569170	95371010	50202030	59371000	51366620	34103670	39094430	22865010	66237520	78932590	62437700
RS15A	225530200	283226700	350186300	210146500	226053800	197234100	242507200	183699800	160007300	225036000	283356700	182822100
INO1	18192040	21558340	17737590	15576900	8002785	12275050	16238080	15313430	16623930	9842586	15924490	5167934
OSBP2	4058451	2900405	3717186	10788270	3895116	3318623	3074705	7723905	3771406	4648319	7779021	6259557
SNX2	30028280	30345800	37704870	24330920	15129990	16227380	21333070	21486550	15153880	25100230	30694600	17026330
HAT1	3722001	3368679	5372140	4089103	2720200	2894202	3823305	3362943	3203873	3629696	4865635	2450542
S10A8	20129570	12941930	13162680	29347350	34704690	28213820	35319200	13378730	11247710	46406040	43419410	53916580
RBM47	8207760	8227528	9938397	11115630	7719395	9162555	12832720	8906538	11068530	11685270	12844830	8657951
CALL5	1176227	1478419	1666969	177018,1	1021570	1236234	212505300	1615654	1594848	376282,3	582454	251320,3
CDC37	9958703	10759950	11435390	7058601	6790967	6558930	5697369	6436963	3505521	7431583	10618170	6939385
CDSN	2621322	636729,7	941772,7	8701952	1311082	4519197	24776240	3369430	7443228	3711582	3095350	3028007
ARF4	51361150	57744530	73517500	16635160	15366750	40673060	63547810	15010100	63124030	33218750	48363990	11725290
PSA6	34458800	49213180	68579830	31348600	33374050	34305490	36497370	26239340	27311590	29874020	46076790	26302970
CSK2B	26193030	22071000	30100410	18162510	22686190	25311890	23597280	17683830	12183140	23886810	32547660	17942040
EHD1	4221477	6137972	7738854	3496711	2472292	10785810	4823375	4815285	2652690	3093702	4841473	10583500
PTBP2	21290490	25021350	35326060	9242284	14003330	22568210	22022880	20459590	17095360	17018690	20126830	10978350
PSA	22019370	23803030	31257770	29593810	19936760	22595330	38401370	23735360	30274280	19166160	31052150	15304960
BAX	1043211	792063,2	1309711	1492119	317029,4	1191750	903374,4	570293,9	163175	327119,6	375350,2	508395,9
KRT86	8197295	179183000	2781275	19039370	3850925	45527040	8716841	4666918	11728470	4069763	4296429	4021934
IDH3B	26027990	19286290	20947980	35922300	28050050	32386610	36977200	37716300	20695980	26912290	32641750	25587290
RAB5B	18050070	19357790	27538090	23445470	22034220	20594750	27576120	8503773	25978510	33295690	42567430	20710510
PUR9	22228690	16650160	27652490	32912560	12662500	18902770	11032600	19133570	14824870	20211580	27902490	18887420
UMPS	14995120	14868690	18732530	10760150	8079339	13675390	12411980	13628380	11141480	11616620	17442300	11273200
F120A	7207612	8053990	12614950	9654849	5788799	4736354	9789689	9232426	10755800	7153372	9182758	5141480
RL23A	83413620	95240520	120351400	92422330	84087460	58724820	50675970	57164490	31897320	86431530	120247300	86389410
SRC8	5810252	4663957	4185915	7804061	4702305	4596895	2200250	5036257	624898,9	1653909	3737283	3852511
TOM70	12869080	13148180	18288110	8506444	7294085	12603500	12261700	10378130	7860370	10512570	11525700	6662350
IGHG1	1197603	976231,9	762414,6	12474690	2441170	1185671	237704100	1628872	6988135	10704580	3767863	3410315
SF3A3	5773711	7434105	9356033	1883879	2695236	4051118	3614413	2726904	3159689	5472261	8214557	3373613
SYHC	35355750	30606030	39176680	31568660	29624570	28190720	28810660	27335620	25578700	31122670	43182600	25025690
RUFY3	9634613	8558391	12207510	7371900	2636074	8654691	9224543	8958508	8115541	9035341	14986120	7368291
RL13A	118412000	125335700	181632000	126048700	92731440	95156690	153886200	130084500	114834100	88853720	127927300	82353910
NUD11	16627710	16944810	20784430	11516340	8490982	13957670	8308950	8203336	6480447	14589680	19539250	13286070
OGDHL	99757320	83260090	103154900	194247700	95779530	109736700	219224000	193198200	160824900	84801380	113375900	76980910
ABCD3	14003250	16559640	20318780	6648700	9235173	21567640	29080770	20321160	28868450	15230140	22893570	7151660
NOMO3	12809930	10752100	13452430	31475520	20054120	16207490	25375030	17020420	18488510	24185070	37097250	19399700
NOMO1	12809930	10752100	13452430	31475520	20054120	16207490	25375030	17020420	18488510	24185070	37097250	19399700
NOMO2	12809930	10752100	13452430	31475520	20054120	16207490	25375030	17020420	18488510	24185070	37097250	19399700
GMPPB	8789612	11165370	15193050	10985410	6456329	10888330	9648067	10583100	12207700	10080760	15830890	8776343
UTRO	1023340	657107,6	804023,4	1029459	642319,6	344088,5	555263	1025381	878517,4	1115477	1340761	1016424
SERPINB3	13407270	8998878	6641142	39969910	28953810	21397960	248685200	22228300	15818780	39594150	17761700	28931750
DNM1L	24594130	30510100	39260860	16726420	25030660	20537870	26899270	25583860	28894450	21320030	35313340	15512150
TIM13	6700173	6329587	6053682	2586418	6292170	5987572	1577822	953665	778555,7	4429334	5137525	5659736
AMPD2	26300460	38458080	45356260	24391500	19162580	24385390	30046290	29603730	31599900	22684690	34874430	16823560
SUCB1	79364930	72024310	94602280	115663700	125966500	99359430	114921200	102526800	74467270	131690500	147951100	109042000
ERO1A	141557300	196977400	213013600	259905200	243696000	321800300	162939900	152103600	119230800	233833100	290754700	162482600
SYN1	7662245	9116015	12090100	15455600	7489266	7327992	13132980	14113260	16076100	4385078	10169850	5531995
C43BP	3050612	2960467	2681779	2424310	1570065	2294503	1304058	2294234	613875,4	1613817	4134215	2479079
SURF4	35185040	66239700	77809940	39112290	17972660	59479630	115648700	40811640	102999400	27137390	36155600	7324541
STT3B	25149750	24689420	22345780	28265970	26427710	32890520	51446760	36549820	37210570	18910200	32445010	16829320
ODO2	73239620	77890630	102158700	181336700	129561900	123093100	230282400	163719700	175815900	128820900	144041100	99119930
GARS	82892770	71635260	73451740	94286320	67646380	57594970	77252450	79045860	71856850	48143910	77593590	47658370
GDIA	195527300	115662700	169675500	159512300	54400610	73055950	72618660	68638210	74121320	60698290	88426180	42739400
PCBP2	44658710	47997130	62801820	67108120	49618970	41112750	37334240	41457150	24018460	54771060	77771420	49663880
ACOC	7093243	9757721	13002290	9070508	5069812	7233417	11448100	7821277	13234960	5604964	9549591	3565490
TCTP	55590960	64486770	81941360	2223821	16009070	45077250	24803650	16259790	12762610	31082270	44051620	27746870
DNJA1	10852330	8945917	13249940	6129062	471696,5	10218960	8210319	10566660	5060519	3975353	557879,1	251312,8
RLA0	67541580	78776490	99659120	67639770	79873440	60224700	55873240	59546810	35788290	55438940	81137420	61881470
RLA0L	67541580	78776490	99659120	67639770	79873440	60224700	55873240	59546810	35788290	55438940	81137420	61881470
TCP4	48319360	34816090	27557930	76623540	92816390	34983770	17480900	52080970	4389485	49388240	70819750	82328870
IF1AX	1541014	1391401	2883626	198951,2	946199,4	2011845	553003,3	459357	526322	1926003	1019584	659156,9
LMAN1	31134800	24406370	36698570	9347141	1371448	30520720	36251440	34084390	23908770	18763280	2523727	3443663
K1C13	318408800	195006700	88857820	650553400	293200700	272470800	1151065000	239157000	507107500	231892600	115058800	181753700
ESYT2	32247160	30384640	43202610	43428130	42078720	30384140	20860880	5624871	38936410	39682800	45500550	33517670
EIF3G	5060930	4578701	4515432	8498938	4700447	1777040	2715944	6549611	1360088	3634374	6266874	3225970
TRAP1	241318300	265674400	352032800	216230100	201254800	180163500	234119300	181925400	246367500	170072400	301870200	143564900
DPYL5	10713060	11400310	15069580	9841905	8557536	6353958	8389565	10920440	11512270	9633576	12652660	7622781
ATX10	4155723	5679825	7792639	2526874	8176611	6751022	2482392	3717761	4131670	5880702	10154700	11595220
IF4G1	37495770	47579790	53837850	46696300	21108350	34688460	59828410	50253430	57262360	29935980	45471190	30206020
P5CR3	19225000	21050770	27274430	17405900	17746280	19750860	12200450	14515350	11865890	24181160	24557030	15754940
CPSF2	1946099	1902197	2906621	3261033	1790277	1355137	1750719	1649785	2732812	2427685	3370155	2033724
BMP1	3251466	3089130	4332868	3420192	1568716	4178641	4970899	4435232	3120664	4112417	5746264	2646401
SQOR	5191894	4590077	5317249	16055470	10822780	8405156	12680030	10591630	9093862	11363510	13764130	9601190
GLYM	337074000	218690700	305718700	449391700	166549500	288609700	349830400	373633600	276691400	353550500	361669100	291685200
HNRPD	120111100	143335900	150269700	104840200	149102500	135446300	65110080	113566000	60674160	147955700	162944600	137024400
EDF1	5190167	2581096	3277074	7497394	2529994	4757253	1180225	1881673	524419,6	8741300	6340960	8771854
MYDGF	12143550	18046700	21884370	4899687	5639607	12680850	10297640	7479249	11499470	6419255	9925312	4559247
RL36	72830180	75333790	92981320	92715150	60339470	45439250	72576570	82670360	39519920	52630750	77951030	53943700
THRB	94224850	18923810	29113450	102110300	81361330	67335080	65336230	54210290	18123960	132077400	109705600	125037500
NP1L1	19732740	17219140	23468140	10007660	14808960	10386610	6876184	8822806	10424630	16814780	29184400	19707520
RAB3D	208208100	287588000	294360600	215530400	251525100	279047900	356912500	232525400	319827100	285339200	358448800	187188300
ERP29	19930980	21949370	29098780	14394810	19447410	18764600	15988120	14657680	7030339	20698940	33957770	16672280
IF4E	35818720	30640960	40233870	19872130	18746870	26597650	17621670	20323330	14216540	26373590	38341800	22940150
ERLN2	46650790	33544510	41996930	101296900	69517240	42694890	89981470	68116970	50256020	58832020	78770440	56918670
AHSA1	9829756	11585960	16435510	4902943	6721866	7979517	8117413	8346978	6045061	7748963	14168920	6209662
PRDX6	14614850	11474180	19527470	58123420	69886620	52976340	31954490	27988200	25096040	30268570	31087430	31175090
UBP14	26140800	30301480	38859620	17488330	12709590	17511580	19247880	19940540	13865430	25518750	34363700	18017510
HS71A	463659000	481359300	649555600	407703000	343567200	350446300	430998400	368983600	332734300	378321300	455830100	300147700
HS71B	463659000	481359300	649555600	407703000	343567200	350446300	430998400	368983600	332734300	378321300	455830100	300147700
ML12B	35123060	22090470	27741900	18256840	16501940	19500090	25556940	10002810	4475718	27827070	37967960	26973000
ML12A	35123060	22090470	27741900	18256840	16501940	19500090	25556940	10002810	4475718	27827070	37967960	26973000
TMTC3	4605559	3732899	6784326	11242880	6540090	6504263	16170080	11767360	9013928	4279875	9758782	6503163
TRY1	76280220	121542000	72648480	44115220	64942300	169867500	115374800	107192300	125193200	66130120	67208180	70379160
GMFB	8256803	6417366	9899225	4133394	6360721	6169640	4800108	1116966	2579691	5192778	11628200	5169687
GPD1L	2729334	3455131	4225771	4014950	3760300	3013668	2104730	2098124	1401298	4066573	6151607	2153080
DDX46	15218090	15589250	18283940	19397230	19892410	17689810	25103040	20148690	20685740	19538840	23798510	16592360
AAPK1	8807417	6261743	10839970	14843850	3855960	8003602	8435823	10369550	11091740	9179491	9157697	7234148
GGCT	1220831	979943,2	449939,3	5088577	1521052	2560935	18080470	1841677	3116401	1234757	1785799	2572416
FETUA	277437,3	263612,3	981062,9	589959,3	46238,96	4076301	3896292	849344,4	1888375	1574514	1513817	1104539
ROA0	7129950	9080791	8391564	8576715	8031852	13481730	13156280	10165980	9699911	13139960	14715710	8605929
FA5	10153000	3678441	4642846	28560240	27731000	19929070	20896340	15419740	11248400	32353660	30500190	26550850
MARE1	30308670	34639630	23630620	25847460	20331320	23608860	17165800	23667980	9338012	11722930	31334360	28498660
UCHL5	12811840	13781290	18943890	5022993	7211444	9779902	8177320	5031327	5110094	7382592	12722890	5249726
K2C8	165839700	201872200	97859600	623559700	527264700	290660800	1432525000	279359300	416665200	310708700	173713200	294873000
ECHB	81643570	58523930	71204520	179038700	93202710	107708600	145561600	135607900	81191690	104134900	124431600	98530850
VAT1L	30634370	34539670	43071040	18516490	21292190	24984400	35226370	20665030	33164380	23823340	35638390	24243800
VATH	23157400	34483970	45167020	29478300	20443170	26522210	35444640	26531850	37785810	27245670	33692150	20322950
SERPINA12	2057382	1800846	1002776	14264460	8804806	3838907	21569140	3645984	7454056	3459789	3772673	3338295
CLPP	7866931	6321836	7639413	6728696	7176752	10285630	9136075	8750460	5605358	3634876	6858699	5510819
HNRPM	92153610	84748970	118580100	88785850	41494680	67229580	89396230	82249450	61658890	72864010	91663280	58484810
SMD1	1295544	1849970	2006665	91775,16	91775,16	1949057	2012252	2167533	1224362	720984,4	225314,9	58915,21
IDH3A	218255600	193145200	227062700	247138600	239610600	223595700	250665500	249323300	128496000	255797400	275595600	202553400
PROF2	15657320	18067690	18339390	15851670	10842460	11223100	8186349	11771730	7381377	16917990	19791130	14600110
PLPP	2945604	2958313	3459413	2772518	3713580	1939457	1114460	2625669	1691541	2278254	4074743	1655748
WDR5	1451162	1248617	1163870	3706069	1571305	1821493	3044157	1997275	1997501	2286034	2955592	838277,9
AP2B1	79122620	85785050	103633200	111343800	69424410	65454630	84342760	82708940	79109940	66381820	108798500	55489180
DDX6	6246396	4674898	11719440	5614474	4827327	4297552	4361813	5427819	1840569	6476123	8838600	4154523
K2C80	988936,1	3907632	452766,5	13362330	7839365	4560864	33772340	4155568	9229253	2279400	1945783	3200473
TBC15	10486890	9185611	6843346	15980260	11533820	4799350	13464340	6943569	14172180	8233104	14329450	4940191
EF1D	51421920	64804330	82872750	29420230	23590460	45228550	51276680	36219730	28573670	42219170	44727700	23036490
UBE2N	116485700	124676900	147175400	74514620	89987890	76908680	55640730	66659940	38709680	72876490	110418300	67852050
GLCE	243051	409651,8	488491	960255	480031,4	308771,6	182227,5	1137643	281354,3	441280,6	389301,7	288695,9
MYH14	12384590	8856532	16026240	17349670	7030849	12057700	21357070	14787710	12318900	9674268	12584150	10495650
MYPT1	316871,4	101583,7	16038,09	2205295	2360736	2360736	362272,8	363299,3	11761,87	325740,8	1431350	1188160
STXB5	2022296	2091303	1715607	4903401	1254919	1598917	10257220	4389037	3018987	2435992	3191098	1159322
GSTP1	3371543	3349096	2638721	14386110	7382698	1391084	6904046	5504204	3145169	2172763	3634402	3165567
K2C71	166551700	205021800	96434390	628527900	543766700	299809700	1461432000	283618100	432933500	315039100	177080200	298523400
SF01	16979530	19593490	26411900	28275690	13697900	12399690	18469790	25355840	12951610	10398770	14047830	9569596
COF1	118257400	113624100	129629900	118856200	59425320	80273550	68990680	106415600	36001350	75103790	145744900	111511200
UFD1	5718809	6348407	10074660	3283052	3614310	3146733	4379939	3526870	1801896	4348758	8388708	2530292
RB39B	211399900	256511200	288206900	136372100	196147800	193997400	269516200	168205300	223481800	203951700	249525400	141840800
FBRL	51961430	63635570	86327300	85457150	56192350	68885920	101850300	80897420	90807310	70982680	80155100	52154790
FAS	23459890	22720840	28765720	28540680	13579060	17372050	51441120	23638070	39823170	19930170	32245920	10819900
STA10	10377460	10347880	14389900	13282450	9719421	8450200	11623530	12169550	7889083	11433050	16336790	9268064
GSDMA	3882405	6681991	5519345	7825108	8428175	8554567	26972200	5295076	10244410	5595992	6308011	5380369
I2BP1	527621,5	423517,7	520967,6	291984,1	68667,69	337116,5	449363,6	550174,5	749247,3	687292,4	791849,3	217515,4
SHLB1	2753957	2234828	2090791	1782938	1688216	1591267	1664731	1693094	2027174	1488971	2800254	1417148
RBBP4	64976890	73064050	96240400	65165010	49474430	58399280	65745760	58127150	61706830	53119740	68845320	35772740
VPS35	47487520	52791060	66755300	43085270	45164680	39367390	63419350	47242520	55275020	53762120	63550390	29742090
BAG2	6646474	1969869	1167755	1598120	769130,7	5412394	1150398	1480831	1464483	1047546	2468492	1282043
ANK2	2638891	1594126	2585453	6687246	2258273	2262552	2741735	5342506	3360205	1295407	3029536	2407065
UBP47	842232,9	487070,2	798757,2	2624937	9757421	905618,8	837252,3	1007490	1028093	1331805	3527397	80290210
NMT1	5251386	1977037	3565561	4582740	3423697	1222080	1379326	4856615	4589900	4720322	4975770	4112475
RS25	367294900	391233300	534980900	438643600	266938200	239985000	457915800	449679000	325088800	291260800	360748300	286104600
IF5	20966230	23060170	31141770	13486820	17511440	20644170	13965250	18211670	11251710	23137580	24767510	19115700
NUDC	16947590	9432712	5214420	22338590	31754260	8756054	4712793	13561990	3406434	11387610	29053930	28972440
ERAP1	1718679	2523710	3959275	128608,1	1546856	3195515	4285367	3308313	2940166	3097281	4746307	1418019
VP26A	12428690	11671530	16778600	11254700	6266771	8876577	17936150	10524320	14085310	10540240	13745510	5171368
TBB8	1034293000	992943200	1253776000	632437700	534263600	771643700	803666800	539679300	512852400	678781300	846105300	519766100
TDRKH	4853678	5002195	5181518	5273875	3619973	4932299	4571864	4355056	2064011	10000670	8821314	8155747
SIL1	3508817	4133149	5985817	3295371	3176737	5081632	3422239	2275089	2473777	2701639	5898155	1653099
MCTS1	899596,3	1293173	1264627	15781900	1230977	1084047	781412,7	734859,4	260213,9	1137900	1786989	383846
FLOT2	2464281	2171401	2921589	4252511	1065470	2601064	5244478	5339099	2942621	3217636	2831906	2199067
ARFP1	3542833	2509577	2865970	2567385	1938163	1110180	1930826	2742178	879345,4	1087856	4751688	2129628
RBM27	1673373	1770152	2246317	2238325	1550454	822807,9	1254584	1324320	766313,7	2600867	2769324	2157075
VATG1	24876900	17541520	10812260	24792180	27104570	19862270	8290205	17645600	3155009	20838930	34140280	40942290
AP180	2819474	3012319	4038373	1638997	1105199	2637707	3656849	2614014	2563073	2285720	3228950	1153615
ITIH2	5563694	4451180	3920710	23420770	48235870	36803400	28290310	30594740	11927840	26910430	35036820	33348740
NPL4	6683957	7196692	8580577	7756480	4097480	5445691	7537698	7957338	7270203	5300247	9150501	2427720
KCC2B	10149910	10495890	16004350	8250795	5009570	10268970	13674090	12758220	11409930	10666930	14263040	6647904
CLCB	22768540	15494050	18077770	16666070	5381852	22074730	7753882	8297472	3990497	24712660	33907800	23677960
UAP1L	41389840	44100500	49987910	23818190	34409530	27040420	26149550	30464640	26650300	37052870	50126900	30727650
ZA2G	2851700	857729,9	974950,7	16383800	3368746	1136033	2221546	1048051	1492509	1402798	2441205	3847278
CNDP2	4255252	2346378	4186788	1451455	2424172	1396240	2383595	1870591	1947996	2919629	5597394	2798883
RS28	169022400	93255120	125971500	108021300	63967480	92322130	39598840	71801960	17367370	122049900	180837300	128209100
RUXGL	6660507	8420785	15370580	265262	579370,8	7560093	5862793	3452223	5119601	3568639	5727116	2733592
RUXG	6660507	8420785	15370580	265262	579370,8	7560093	5862793	3452223	5119601	3568639	5727116	2733592
RPR1A	4810391	5070630	6921024	6166586	5654605	2257780	1490165	2273968	1133933	4901894	9676159	5883557
UB2V2	53670470	35623210	46087110	60700550	42137390	30574560	21237930	26762870	14237830	46082150	78043860	58155940
AMPL	21397040	22247710	27896580	18717130	17846930	18436880	22588910	20160510	14489700	23185590	24580880	14078400
HS74L	34059740	34613620	47940990	35553260	27826430	31086400	33661390	33825140	24091880	34767690	40438970	24739000
GLYC	17657230	11516120	15052360	16170040	11362160	21276440	12147690	10137480	11069240	13254840	15534150	9225829
RB27A	261077800	300782400	336116100	176660700	232718500	234562900	304375000	204891300	252822000	243428100	296542500	180314700
CSN6	15090560	16522340	19376780	8795434	8617029	12158700	12645130	9297397	10001120	10775600	16873910	6558635
GBB1	70147180	53249320	62665230	83240800	48699270	49980110	52347150	47748300	47553160	71340140	82532590	44149720
UB2E3	2678168	2368904	2855200	1704979	2733193	2113105	1280958	1793523	717678,4	2023071	3102891	2255050
UB2E2	2678168	2368904	2855200	1704979	2733193	2113105	1280958	1793523	717678,4	2023071	3102891	2255050
SRSF5	120789800	135864900	172156600	127176400	93722980	88388810	99177410	96190750	101123800	108088400	130209100	93754790
MIC19	16813640	3396157	2945381	17486580	6625708	3620577	2250580	2512698	1099564	5264901	8041514	6962815
UFL1	1843631	3071301	3479992	4938434	2702612	1443332	3585712	2631207	1807601	3875089	6147671	2468126
RAE1L	628169,2	1177561	898752,2	1806793	1677328	640691,9	707668,2	851607	293518,6	2336943	2801020	1061083
DC1L2	1022735	2133933	1763183	2017871	1283217	370348,2	1828221	2188195	387732,7	1091227	1386190	1000624
PRP6	14231130	12609370	17450410	24086990	16419980	16907330	17029190	19177250	15915840	21594770	24413040	18276250
QCR2	17132830	15111660	21889080	24915420	18822290	22715250	26903050	19835820	17925940	18632810	23544170	15282720
RHOA	77658020	83013810	102835100	37648360	58365560	68831940	65448520	52497150	39618110	68154820	81271240	51384330
H1.4	1111452000	1116477000	10680230000	13432230000	11478170000	12773790000	7601068000	5476610000	3973267000	6106650000	9725270000	9462140000
H1.3	1111452000	1116477000	10680230000	12432230000	11478170000	10773790000	7601068000	7476610000	3973267000	8106650000	9725270000	7462140000
H1.2	11114520000	1116477000	1068023000	12432230000	11478170000	11773790000	7601068000	7476610000	3973267000	9106650000	9725270000	8462140000
GEPH	6682952	4523113	6664618	14307520	6247425	4529355	2550385	3885292	5354862	5407315	7992731	5775816
ARMX3	2822968	2595123	4589668	4225196	4093815	3384914	3821333	2301197	2087178	5492734	6250354	4760362
FLOT1	1021124	247305,2	786453,9	4527098	1047288	987411,7	2663924	2435778	2115636	996203,9	2392983	1752787
SYEP	86086220	48485910	97730650	173249200	33043160	73965070	67359480	81612110	119150200	85592740	117440700	63264820
ATD3A	1126249	741376,8	217428,8	45591,02	107864	1187104	1980000	2156627	583113,7	80022,14	302329,6	257476,7
LONP2	1485457	844653,6	1328763	2939966	1777313	724405,2	2093770	2141455	1219893	527697,9	1010098	219835
S27A4	10470910	8942195	10422690	13046450	5668555	10687690	12865300	12887890	10732420	11900430	10246350	2748746
ALDOB	10784590	10076350	12910010	9171593	7539643	5883964	5619765	7103765	5464984	9146664	14792140	8534079
STK25	5136312	6167974	7198051	2429776	4658880	4926822	5594137	4474327	4552744	4990324	6140156	3805126
STK26	5136312	6167974	7198051	2429776	4658880	4926822	5594137	4474327	4552744	4990324	6140156	3805126
MYH10	13764080	17525140	15841670	34683620	21257640	18143550	31201600	26624800	26015870	14194270	25989720	20551900
AP1B1	65104860	70390670	82483860	86475860	60878360	50175410	69286120	67567030	53222260	49077530	80499590	50326150
RFC3	5022403	745040,7	1022629	5817567	1563677	301794,3	577072,6	745008,8	555163,6	2062722	2036356	1974974
HS12A	3853070	4267455	5541637	2761827	3719460	2534501	3373128	3148524	3958636	4556790	5051409	2666552
PDCD5	8551656	6901629	12331230	3356075	3100275	5658624	1259274	1876656	1010646	7412783	13460150	7895556
RL17	58890830	57982900	68531510	42787520	42536500	43606490	53056330	73606910	21171600	45820650	61967960	51066330
FKB11	9305067	12589020	14629860	19395590	21131660	18231520	18436190	23896250	7571042	23494930	28808040	26832480
RPR1B	7390840	7267968	9948966	3867816	9113473	6730351	4768570	6207003	3009750	10629550	15290110	9200914
UBP7	1223489	1870895	2011885	3235327	905489,5	12778930	2984156	2664392	3178771	1518349	3104369	1815222
PRC2A	670026,9	991741,4	1357797	3847451	726851,9	515720,3	1366679	3543896	2345091	719950,5	1229460	728700,9
APOB	1275471	1249830	2011960	21037090	18639460	9152148	17328540	11556030	7654702	13060520	15812420	16115100
SCRN1	8698905	9625245	13625160	7201909	9277512	7086331	5395383	6882453	4837132	7728622	11202020	6695364
CDK1	41092840	56342900	71647530	45995060	51535690	46541310	44956300	37497540	44650470	51084440	70893350	41459890
RU17	16961940	11616480	28188950	19940520	7392066	19495320	10011760	18423040	13878940	21682560	25432990	15514840
PLAP	2963732	865705,7	1271969	11318520	4076909	970710,3	1460124	2578530	3181750	1948096	2884253	3038240
IMA1	1534217	2132260	2397425	1272681	784351,5	1279056	66897,06	611780,8	1119098	520311,9	954336,5	408914,3
DP13A	2630546	2712056	3366996	2756686	2090798	1726365	3554351	2705022	2307717	2639468	3983742	1700038
PSME1	57894410	61050250	62062740	29392140	34070440	42414220	39510850	40885870	24795260	51601830	61141210	44234490
ETFD	16217570	12486450	14492290	43166240	23838390	25455840	31007590	29844250	24100590	31380080	35157320	24503030
SLK	2637159	3004035	3372069	2209903	2085721	2057152	3677222	2937969	3345050	3703339	3905955	3054536
CLPX	5758365	4197001	5939623	8132007	7898123	6486313	10347940	10555860	6287695	8519090	10194360	7397035
GELS	3073068	1551290	2122837	2455476	5756488	5034577	11833380	3487773	1712457	8185108	10214960	7560193
RIDA	7084246	10383430	10158920	10302570	13248560	19875380	7442533	8905248	4293341	20745510	21558360	23787170
TRRAP	89197,6	112591,5	286840	202139,1	69818,16	128811,8	289758,8	163159,4	157654,6	324484,7	428269,6	86266,76
EPN4	6487096	5781730	4843105	10186870	5732319	7869601	4666047	7985389	2591620	4263085	7584254	7867389
APEX1	3618932	4748835	6976437	12326350	12593230	6366744	7908414	15851270	7699503	6610006	11918220	7055417
CNOT9	735333,2	371815,7	745134,8	414757,8	1088476	351669,3	567362,3	561708,2	257340,8	1785483	1842672	1530707
PDCD6	13552920	16341110	28317970	7051947	6436058	16015190	8220882	6855574	6012718	24582660	28816230	14724340
PCBP3	24637100	23626260	33661130	59783100	42224640	21537540	18882530	22411260	15819980	29827220	44965580	32795970
TETN	15527,11	143224	103401	1505172	4206773	3889718	256609,7	1062760	353031,9	692142	1690961	2353750
2ABA	10839030	11395720	13592010	14132200	9728026	12833000	20066100	11883880	15804350	12578790	19814700	9175904
CA2D1	5987940	4347398	6055184	9150812	8004235	6490879	2976535	3994675	2616937	7634231	10448510	6599201
DRG1	1760231	1676037	2852433	1116702	1336526	946730,4	2188406	2451713	1060059	1978303	2234813	680940,1
RAC1	108251400	97941730	90144920	96901500	94778710	69478480	98209960	117909400	95743360	112353300	152729100	102953700
ZN326	1096342	909660,8	1525190	658141,6	812805,2	597986,6	949782	1001272	751176,4	841376,1	1113037	403571,8
SPT6H	1087491	3384219	3774770	2738435	2715130	4288818	8336034	4170941	9487054	1503839	4352642	415577,3
SCFD1	2890093	2702980	4206750	3588446	1937069	1321775	1602483	1005753	2237526	2870029	5111609	1356872
ANT3	5894795	3618471	4054109	46811640	53150310	39951130	26320080	24628850	12462200	31312620	36791040	39898790
APMAP	8808974	7951766	7125630	24504000	20051280	14192940	17415900	18837610	10967650	17115230	17578320	17346930
SC24D	9554478	12105240	15662550	12561150	4870017	7743801	16748100	10861520	21011470	8513573	14902780	2946743
COR1B	17644860	21001640	25172320	19633570	15985330	18022600	15161520	15713930	20170760	16586730	24225540	14492050
EIF3K	486118,1	679856,9	1754693	125692,7	66831,94	253168,9	101414,5	231260,2	96595,78	215544,1	103586,6	74836,76
DEK	19523530	19065830	25735860	16017280	13699040	15771240	14417920	24185090	8485577	23089920	23764540	14830440
ACSL5	13214880	11977820	14724680	15102490	12005160	17451170	23896640	19362820	17648410	17640290	19615450	9469404
GTR1	17656820	17764160	23347060	5785749	3089595	7544090	14476770	10388380	15980730	14323050	10885130	2987848
WFS1	10479610	14154020	16759670	31280800	23514000	17170600	37118310	22241890	32709520	11424370	22383200	13471770
FACR1	1031665	525903,2	1182647	2861992	1366893	473721,2	1270279	1050174	1435851	1008503	1503490	459075,2
NEDD4	8914796	10682010	14395330	9553849	5847403	10027950	14527950	9149998	15008910	5533793	14116180	2785116
EMC3	1211222	1058964	1400785	2063139	2394702	1274727	1794506	1160151	1982106	1691297	3640592	1496084
QCR1	70547580	39826400	67105910	99688450	93695610	73320560	102886600	89964770	66341380	87153570	94434160	83941160
UBQL1	12558740	11275310	15677450	3905634	1595662	7619509	5122891	5040771	2657684	2764023	3655942	1681635
HEXA	53066750	54074400	66179360	62409940	60485270	81639980	77043990	63938760	51333180	89520290	99933270	55510510
MYG1	49080220	59767610	81376780	54688790	39717630	46344730	46692040	47820130	43600700	57799270	68285670	35787430
TPM3	68229020	75965630	56449840	62212220	34364040	48282180	54695040	31920020	23936510	44084040	71678060	53050730
TPM1	43816510	53735980	51261710	30662360	18143910	36615130	43407680	22899530	19142390	29314150	47567200	29530390
SRPRA	8986082	7033814	12192470	8835059	7126068	7800249	8447584	10191920	7517589	7358719	9891011	3806626
PIGT	5201823	5202394	5992498	5830119	5786277	6895289	12077140	6554006	9028885	8203183	9582634	3062034
FA98B	1669998	1435600	3175363	1782369	4565699	2133940	1309884	2126023	829716,2	1549611	2497691	2088403
STIM1	2008656	2372694	5085718	2218994	1262839	3539509	2625571	1988951	1278127	2873961	2347525	1282443
GSR	18617290	15571150	19828820	58314410	59717640	61794990	30907240	32062470	33683040	35191200	36223980	37220620
BABA2	8094095	7054371	10361390	7068194	5722371	6212151	6796777	7545672	5187786	10438200	10229190	6151594
CUL3	2618026	2857461	4442285	1988136	508506,4	1654930	2604371	2300747	3929368	2819143	3907045	1275992
ATG7	671890	648004,2	761244,4	702030,4	750536,7	228372,1	742695,8	521526,7	278026,4	832297,4	746805,6	307763,7
UN45A	1497859	1622817	1988494	1583673	862735,8	1358282	2320841	1623834	764323	273248,8	1793673	1017372
ANXA1	419687,2	223882,1	118739,2	3194603	1861568	354122	30274450	935398,9	1265732	3301991	1055353	1731870
NENF	16041080	14209110	16802550	26407460	22615710	16694040	4411149	8726752	3029666	25353560	39788160	30729230
NISCH	942938,8	721205,3	738936,4	1314044	902379,1	4002336	2594809	3373165	1467438	1579358	1310855	1588645
SF3A1	7577745	9031026	9054577	10242120	7892653	7868417	12198540	12532130	11205260	9191311	9177526	5966945
K1324	16341170	15554490	16154140	30536240	21580580	20053770	25123920	19332570	17882810	14768550	26810780	14460660
GLU2B	86229630	40589280	44071510	76190240	18439720	36588610	18164560	20979400	16427300	54880860	57915840	39630330
AATC	77548020	89661340	115447000	68984090	52168820	63651790	58826980	42126570	56813220	71016980	98639310	55714700
SMHD1	1909676	2652061	2536545	2839740	3080568	2117320	4701149	6334106	4871130	1552416	1660200	2466590
UBE4B	2587407	1734378	1841137	3844922	254467,6	2426750	2300823	3540423	2969882	121940,4	3347321	1664521
EIF3I	24986780	18762000	27961220	19843680	2489893	17739520	21653540	22307390	17181690	14272220	14663750	10024420
SNX1	9492482	18660170	18911410	15397100	13300720	11879240	14155060	13877720	8036103	16017880	19033940	9378022
PP4P1	1490381	1828358	1948588	1807809	2388437	2559277	2640735	3714950	1084871	2241921	1864180	1180739
SC61B	44153210	35540740	46556280	20244890	25882500	25326510	17382850	13758340	13882770	22814150	35713520	17233350
ARP5L	8850603	14180570	20116200	4119620	8440761	9008022	11703700	4131783	1927330	10303530	18433850	8622500
ELAV1	74508080	77479170	99633190	69258440	67914960	57523300	48544450	63498150	38078880	78800190	101891000	74241700
EMC8	12159990	9213631	10754880	17971440	15165520	13478880	12357340	11958020	7078306	19450630	20897100	14299120
CNTN1	3780842	4595079	6030093	6579898	6844548	6126815	4641251	4685844	2483539	6205300	7324388	8576810
CMC2	57970490	59682620	72159110	101507100	78037780	98975180	143044700	96304350	106599400	81697820	103878600	56060470
TCRG1	4109352	2936311	5583662	7247663	7338612	4710578	3716084	4243337	5018467	5594364	6487232	3578232
DHB4	12974110	14798270	18596110	26907060	19131300	14906690	34229300	19512390	23378330	22216100	26203960	21487890
MP2K2	16503050	15907430	19426810	9438347	13774130	15256080	11725580	14168310	9546477	15422260	23172430	14939960
UCHL1	103765100	113905400	153320900	49788580	61236950	88944110	44845230	55595170	43378240	93644810	124960100	67222720
NLTP	18216570	20157790	29133340	14542520	16544010	22332120	12699330	12616760	7624070	23372100	25440840	20775460
BIG2	4834180	5931106	9219966	8233149	4889933	6607423	10077050	7060911	12270920	4720364	10079910	2910696
AMFR	97845,96	585726	758042,4	478350,4	659337,9	688334,5	501371,4	658060,6	440748,4	279858,5	678396,1	396902,5
SR140	3224557	2247538	3417429	3190947	5810475	2103016	3570893	2302430	8390200	2527246	3614433	1119548
APT	6517195	8725114	10107450	8175929	7249725	6868601	14731520	7646756	5243856	1992645	8601130	4941710
SC11A	34164950	25646610	28475330	30431550	21369410	33172860	42854050	26095830	28892040	30234720	39693300	18771980
CHERP	1807682	1714434	2594883	2885334	974014,6	1462240	2949131	2591660	3338724	2867137	2239928	918987,8
TMX4	11090910	6625068	6384945	14832460	14460730	9242345	7549252	9522306	4378251	3318120	8257737	3453883
PP1G	22883390	23586760	30047080	13970810	17171320	23011010	22435240	15355870	17860500	20444340	28273300	10942100
DPOD1	4292539	3236482	6457080	8965416	6306716	3038791	3704262	7736195	6639406	6202854	8706998	5458603
SMCA4	1555648	2263446	3518562	5510698	1531149	992693,6	3569960	1717094	4976601	1296298	2991009	1753697
NBAS	3900924	3647774	4478087	3474899	2623848	7418149	8179871	4956408	8822592	5575025	6131815	1824187
MYO1B	7285393	9989695	13680490	16563240	11402360	11437420	19450590	12529180	19294490	13829010	18019750	8890310
BLMH	5829479	5752027	3476773	11997770	10727090	8082781	60033250	8128927	12303910	6183162	6622850	6942174
ARL1	6145741	10651970	15186480	4580717	3122034	10768420	18096000	5401144	19287480	6520057	12632440	2024320
FIS1	8896208	743454,6	1736614	9192199	617980,3	2923251	669401,2	672924,3	1199765	3019213	2435200	3460192
VATC1	41038960	43213950	62437420	28151870	37385470	40399740	37054050	37718950	30860010	46900590	57223270	40457130
PLST	7245356	6494323	9563987	8348537	3848123	5801302	21611620	4248119	2993243	4964398	7399496	3627576
STMN1	74002920	75547750	90427250	17372050	24893900	45854320	12282780	19133250	11655700	49388840	67893110	47950830
K2C4	113083000	124658600	45755150	572537500	498871300	172016100	736834000	227729400	198171800	176404800	107963200	235648100
COG4	1151656	1379189	1853388	1537685	803794,8	1162058	1252627	628375,4	1136458	1250215	1770959	1025241
H4	5704079000	6686064000	8160064000	6123406000	4388170000	3661875000	5256405000	6357726000	3024767000	3418776000	4546405000	3521318000
MTCH2	65554390	65098860	83219050	71735300	69968180	86666910	108681500	87912530	73512570	85206340	94134990	65265470
ARL8B	71506150	74061770	88635750	97741810	66443360	80576080	118681700	82542200	74562740	95313330	117692400	73292790
LSM6	7149061	8361930	8127071	6042413	6049011	7558043	3319119	2266727	1375085	6008026	10202470	6376370
BRCC3	200600,7	149794,1	235482,8	233990	76274,86	112007,9	99777,47	109412,2	50283,78	190008	545034,5	464913,6
HDAC1	9326136	10375060	16520760	9673110	5440474	11193380	17283730	10923340	18165860	10561570	13167380	4380126
HDAC2	9326136	10375060	16520760	9673110	5440474	11193380	17283730	10923340	18165860	10561570	13167380	4380126
TM9S3	45164540	41377300	62984330	58455030	40193650	53473770	93972550	59384950	80071800	57381370	63685690	31103300
VAC14	254154,6	327582,2	452085,9	589951,5	196906,7	499480,7	437613,2	842460,4	221623,8	735143,5	1128788	447760,5
AL9A1	36170570	35919460	42417570	45065370	37234600	30710610	35024510	39566680	32044260	27844280	44238280	31474830
DNMT1	7913078	9374655	13989720	15245070	6666324	8747108	11034410	11298990	19548130	6003127	12068380	3730474
PEDF	1641778	773315,4	807079,2	2085247	6596384	6677275	4115592	4263984	2085110	7194227	6888169	6791600
NDUFS8	965665	917185,5	932677,1	1911978	1790263	1477925	2654762	2577466	2799496	2822461	3441044	3996487,2
CASPE	3635379	2632878	2509552	7676737	1448803	6808003	36662040	2795882	8048218	9569365	9568651	10696020
PIR	140488,2	189137,3	123215,5	52735,85	88590,71	413393,8	188721,2	269008,9	91113,62	174022,5	174022,5	137648,8
NFU1	3729479	2222027	2847902	2451543	1797945	3448071	1162145	2212506	511971,4	3867315	5243130	4568898
TALDO	96653820	120608300	162795100	40681230	44063860	66324410	70974420	44529010	48707550	59190510	79637180	34384990
PSA3	30089730	34423140	53035650	25252380	6275267	26823880	28782080	19256520	21345910	24459910	42298140	21393280
LSM3	14053400	16632620	19829960	5879540	9989388	13792730	6842677	6552352	3147922	14403590	17426860	11349370
DDX21	13622900	18706730	22958820	29012010	22346690	16498150	27732250	23967960	31113820	19168790	26987720	16297120
PGM2	3825119	2529450	3390527	9266447	1979522	2254517	6832287	3144989	3508995	3323955	4667851	2952206
VGF	3601412	242497,1	186446	10401350	3111187	876271,9	1658440	760754,7	625383,5	584507,3	1646721	2350989
SMC4	4411081	5142474	6734099	13449630	9169902	3050136	7945744	6333494	5399520	11774650	13741110	8361627
FKBP3	52246840	56536740	64605410	35712850	48418290	35473210	23762870	45281970	12316450	42989250	61329670	49313190
CCAR2	5605142	7551176	10238660	7884338	4312948	4071912	8019709	6709361	8143926	6017612	9179874	3580488
LUM	456869,8	565675,4	487161,1	34517,3	367758,9	1080069	587610,1	338967,9	459762,2	1107001	593003,1	188790,6
PROF1	110799400	128558900	143818600	91111420	83018370	82103550	80861990	71663430	57301480	73731960	98144640	69768350
CSN2	1974631	5642314	8144516	300105,8	490545,8	4210044	2672878	3074820	3778668	692649,8	1221610	447397,4
OGT1	2850026	3896100	4553889	5767717	2429755	3376944	3818757	3038728	3434028	1887846	4796668	1727023
HPRT	40008160	64456690	91917550	34092480	43977920	47840450	29551960	31084320	27913860	43629530	69423950	28408340
GNAQ	2029893	615050,6	2594957	971257,2	848513,9	382146,3	2295161	1820447	2437921	2289785	3275074	1282714
PARN	525459,3	797278,2	1351725	1802345	1029029	455700	844138,2	1260036	1071843	624540,8	1484227	840193,6
SYK	47708000	57317900	63882060	40466150	25960690	44107810	50849530	48882690	43348570	37384900	52061310	22387970
FLNC	11971650	15007490	14921640	30500890	19060710	14357290	16198650	19509410	18600540	17283920	25916260	14865620
PRKRA	1522041	2287229	2337695	1848102	4585775	2737653	2773605	2232787	844064,9	3673449	3487715	4075907
USO1	52958550	58231210	82686790	65357040	46987960	45983640	49681820	42313380	53781600	50314270	71528140	37788920
AP3D1	5416371	9097916	11226420	6910948	2457723	7207842	21731250	8005817	24851350	4684429	5213012	1112988
SUN1	524457,6	499331,6	446672,4	811841,1	1434508	358973,8	615306,6	839430,1	181162,2	646600,5	799226,6	343562,7
TIM8A	3499476	3431363	4107435	1373149	2082543	3769017	1145554	1260524	722617,8	4608949	5776812	3745359
NNRE	25033410	26129490	31081890	31692920	25952450	20547650	18599350	23005400	15490690	18547880	18541590	16161240
PSMD5	4772540	7675422	8644245	6631647	5860367	6271816	1239866	6398405	5620210	2924676	5105781	4160426
OPA1	2888040	3067523	3290042	5019641	3819248	4123707	4183030	3490198	3307765	2716290	4269990	2181765
LIN7C	10523150	10191820	9934361	5124162	8815717	10781540	3273701	4518810	1310281	10756750	15931400	11826130
PEPD	3386011	7509216	8606042	3761778	661505,2	5734006	8827292	6138875	6289076	764993	1559697	48687,93
SMC2	15277980	20227090	27748880	27494520	20647610	13193180	20636890	18257780	18593740	19785480	25112360	16656940
UBE3A	889391,3	1062417	1121254	1615148	701156,9	557399,1	511386,5	927768,6	736771,7	1282162	1787486	1411828
MP2K1	12827450	11707540	15573260	7505351	10821070	11930040	8570982	11514220	8057157	11851110	18463700	11684550
FHL1	2765656	2948086	3734806	3093322	1071446	2797796	1583873	1328491	2790356	3207294	5314191	2428528
GALE	4719908	4066578	4566115	3382362	2287063	3345987	3583111	3720334	2412063	2805791	5319801	3369016
PSMD9	8929284	6509728	13413980	2720212	3215453	7261364	4130944	4642836	2038089	11400110	14437260	8586373
LRC59	148337600	136403600	201618400	206425800	149080500	107462700	106127400	161322900	79051500	145751600	186361500	151404800
SYFB	11382130	12166310	17526140	9570069	10169360	8831635	14212840	11058710	13599230	11050110	16182780	7138699
PFD6	8909159	8003717	10140480	4032910	5569042	7048409	1858578	3003521	1331013	10051780	14930300	10447350
G3PT	1167849000	952886300	1108138000	1494329000	575920600	583473000	540048000	821275400	507617800	629960800	876782900	625922000
VATF	2703033	2572752	3398973	2275906	2936314	2659365	976433,4	982556,9	98894,58	1202077	2971927	2481898
PPME1	13505640	14798250	19346230	13038420	14415090	10542910	7560293	12847930	6376965	8696259	16423820	9061589
FA49B	668617,4	1810731	2632961	299705,1	307559,6	1186052	403368,9	315072,6	262228,1	966376,9	1566745	294460,8
RUN3A	1479412	1258459	1582839	841121,2	1642699	1722111	892579,4	1102294	1800284	1485275	2802810	1310619
GNAS1	98869290	105929900	148835500	126673800	107994900	95547300	100278800	103271800	102190800	93835110	114695000	85225330
MYEF2	26562570	19202600	25327460	26144870	10999290	7835485	15036030	15883750	5744939	19814480	16799280	12624520
CNOT1	4983687	6211796	7593336	7792262	4140320	7830720	10758210	6889432	10379550	5541010	9747741	6212799
TRFL	45449230	31412000	38841190	765285300	855754500	712694400	731717800	749495800	352084600	617349600	626604100	756069900
VATE1	45287480	41222810	71015500	68482690	47697530	61243330	27822060	35884610	16954600	60176850	53879000	66240650
RANG	20104140	16032330	16048870	19128400	15570200	13314210	3730539	10115240	3705092	23207240	30253650	24038750
SIAS	9246669	9775780	11272900	4493799	3046568	6491157	5642462	5851937	6813679	3815249	6505399	791933,6
IF4B	56911170	64793300	72732210	48487980	40827330	49679040	42853110	48300100	37597010	58241180	73209230	56984510
CADH2	62846,44	20675,47	333829,2	196672,3	692258,2	27209,53	26178,16	282471,7	18051,33	875827,5	1401986	284818,6
PRDX1	154656700	197565000	149441600	518497300	427797200	367292400	391601200	358789000	200734000	374537200	370628400	462963100
RASA1	2171899	2775590	2620211	3319714	3892170	4305156	5031400	4356672	4569288	5710250	6260545	5839793
PPM1A	9845472	7242326	12233480	6521167	4442182	5432583	2783866	4695294	3405484	6747999	8761872	3652988
CPNE3	7052559	7216449	9883466	7673728	7302764	10237100	11614370	6827728	5473781	7648628	12587500	7645992
TPPC3	10947820	6022470	11859440	6949343	4436226	8766193	3509079	5079094	2279365	15238170	19082210	12631450
LNP	5698614	5337804	6137231	3568044	2412831	3670856	5904712	5215851	3379025	3327186	989027,3	1193882
HPCL1	17302640	18843980	23069900	1920123	4808654	17398660	5226015	9948769	3594364	17694840	25084140	16790780
HPCA	17302640	18843980	23069900	1920123	4808654	17398660	5226015	9948769	3594364	17694840	25084140	16790780
TGM1	382401,5	618383,5	341575,2	716307	674235,5	1013272	6242474	1062496	2074959	260207	615797,3	478552,7
NAA15	15567330	12531450	17566590	11754890	6363928	14035480	13018480	9694066	16830670	12179220	16223290	7351548
DCD	1136275	2673421	2008299	14804120	9755568	5860077	8729589	4914579	6877989	5049557	4964534	5855491
LDHA	420111400	372327200	439245000	277270400	300458900	276839100	350404700	274702600	302365100	272689200	351846600	178960800
RL24	84100390	77726180	101226000	109866400	77942040	65025060	90358170	84686090	68724710	68624880	84184550	69094150
PP4R2	45049,54	228641,1	506275,8	92902,44	92902,44	92902,44	69795,32	13940,57	39388,71	13973,02	20495,04	19048,74
AP3B1	7329336	6544766	7604950	14250550	6164433	7596430	10517210	10401920	9398803	5888023	12620460	4152996
SMD3	53215770	72278050	89597080	34241780	44588990	56316740	46761100	44515030	31836440	51209510	70224390	44873750
HMGB2	32600700	42233960	45847330	64355500	62607390	33334420	40224660	36224660	36386500	32900600	35649500	26208390
PYRG2	4249155	5864441	10878550	5092188	4684625	6121906	8192364	7282378	7860870	4677167	6485943	3027568
ESRP1	1245403	634026,4	1213828	1651835	368077,6	1191922	2166804	1258256	1221919	1041109	1129682	426338,5
TAGL3	1709763	1276666	2446829	3235547	16139140	1214406	17628340	20334800	23301790	8003137	8330041	11464980
VRK1	12134810	14605200	19408590	12717240	10365580	8310309	8467735	15140780	7235983	10912700	15714340	10068980
RAP1A	121571600	149361000	131425600	120789300	109982000	93471720	123787900	158280200	128050100	141023700	165266400	111144700
NOP58	14344450	13497310	22526620	20921990	12365700	17415760	19936560	16030900	24285810	21732730	25808070	13554850
ROAA	105239000	109453400	93107080	58805020	67464360	84622700	45077940	66078440	36915700	87875670	88397940	78291470
ACINU	2783869	4267028	7401779	1856524	4475880	3995337	6122901	4671214	6446370	6377232	9565174	5403713
EIF3E	39600970	31912270	39639910	34334430	10316930	25577490	35216700	15366230	31036330	23458320	17794470	7167972
LPPRC	19266990	13328720	19099710	32576980	27688650	18719780	37816100	23770830	29791610	35257130	44238030	24264380
KI21A	1006360	1273471	768472,3	4661613	2380708	704454,9	757562,3	1143672	1043318	787847,1	2907097	2473291
ARPC2	12424690	16563330	24605180	13350220	11737030	9931307	23720430	11153040	20558850	14614340	22516770	7872626
GALT1	1011282	191225,8	334599	2783529	258072,8	575084	452976,8	382793	364448,3	1124329	3707811	1396241
RAB12	211116000	258006500	286726000	137114100	197146200	194544800	268439500	169044300	221187700	204622800	248296100	141453500
SPCS3	61818520	10672830	20012150	59115560	8436693	25199480	14316000	6248138	18639160	33606880	32720940	23125670
DNJC2	3278726	3234216	4644707	5829076	2661699	2176459	2665182	3956138	2109558	4718208	4904930	3432750
CASA1	52267840	56092860	35122670	59508700	56578970	102308200	36643810	65870980	24642000	1749828	1339803	4426174
IST1	7671681	7693140	10141730	6942944	3537963	6231011	10421150	8745888	5096847	6030682	9421026	6252455
GLCM	28200350	31498890	40616740	33710730	32365810	30348700	49318230	33849960	27723510	33075180	41933210	20476330
AP3M1	10141090	13979790	17966760	14289100	9289968	14456060	19308620	11427620	20867820	16387900	19787500	8385458
PPAC	75413080	83419300	96924590	46545550	64381570	63508190	37895860	46234540	25373410	66379490	81033880	64057090
ARPC3	37252350	38164900	52654850	27526480	29356210	30178870	26573450	20396430	14475690	38140220	49718660	25612640
NDKB	607192200	836857100	1069375000	335788500	469818700	547744300	301022200	305098300	250037100	434577500	602403100	389452100
RAB35	292400800	333949400	376812400	188600200	250394300	245639900	340252400	209201200	293596900	268656500	321540400	186188900
RL18	48938700	35955680	51191240	50228820	26921570	34359960	46096320	31245480	39853000	35247720	49523070	23678510
AFG32	11100790	7043188	11130790	25526570	17356220	12888770	22581000	24046240	12424810	19841390	22298480	17183260
SERC	54637540	52419270	56920980	29055200	19334610	34074630	33886920	30291010	35234220	26443350	35250320	11715370
H1X	7018362	6860695	8778868	4871622	9222102	8926333	6815774	10085690	5209430	4911019	5291618	4812742
IGHA1	681566,9	884753,2	764147,6	8695028	5792500	678961,7	23771010	3178813	1838309	2465285	17597810	4894252
DHRS4	45081600	42816570	57994110	50348470	32117100	55223090	49199140	46276390	37628230	65233440	74756690	55555810
ERGI1	25813090	21094890	29221500	25075000	24213900	33626480	35442540	32190070	26353620	34154040	35852710	22255650
PP1B	25581760	25748720	33155090	8361985	15958370	23925230	27060210	15909620	18933510	20847350	28531500	10824900
BRE1A	561369,1	1497007	1038301	2832584	1514054	488149	846282,8	1648298	997717,8	859630,6	1016814	1160768
UPP	1970168	184805,2	1655986	3366479	49991,2	2370135	342232,2	455603,9	840211,1	2958192	3455791	2192557
DRG2	6859324	6281851	9091705	8118349	5333194	5818851	7544852	6652095	7264912	7943886	7394079	4067413
ITAV	10286450	8204993	12825570	10844900	8178092	12948610	9684758	11406700	5978093	9794366	9604722	6763063
PDIP2	171098,4	178604,4	336615,4	95081,29	201355,8	252249,2	530226,1	357806,7	281538,8	231764	644777,8	266267,5
GIT1	1065065	820418,3	1327474	1136404	1213039	1265151	1474073	1752841	1362446	456280,2	1236435	300576,4
PIPNA	14675970	14660080	21791390	6056095	8132239	11892040	10997950	8182143	4712549	8458638	13560050	8172079
TBB4A	1668738000	1677372000	2022432000	947892200	865681000	1323236000	1280428000	965386400	885145800	1218801000	1409342000	879946200
TLE3	1868183	916245,4	2387359	4121543	208418,3	1124989	1230560	2028581	3026770	910486,1	2208336	1619294
PLCG1	433811,4	1104240	1863613	1066177	484086,7	1056470	1598880	867384,1	1352457	1237167	2023878	386886
OCAD1	306838,8	530071,2	894698,8	136070,9	44322,24	854603,4	686947,6	318170,4	312738	693365	517985,2	24074,77
UBE2O	16879170	13562920	17085980	8957466	6689390	10173070	11066170	10135170	11450020	4958319	9072958	3224688
GLOD4	16513290	11100100	15346720	19310470	14832820	9706463	9222740	8618458	3479889	16234120	20837210	15801890
CSN1	10983460	14268550	25222060	7998182	5071582	11776660	13562000	8802022	16123700	8444533	14834850	3483096
BUB3	21766120	22241410	22145280	28324440	21260120	21191250	29072370	20319470	31131720	21540660	31021890	16083230
TXTP	11737140	12551450	18082260	9969425	7491815	16620420	30525380	17670840	20559950	15263520	14332520	6340285
RB22A	6338419	5279819	7504378	8184677	8538952	5561105	5003271	5123290	3406640	11584390	10823440	7719836
DDB1	18874530	24578550	26236550	19100660	11350640	15128380	26292950	20600740	26303960	7904707	14307660	5676072
CHIP	9350929	9115134	12411600	3033864	6058929	4009254	2653500	1560354	1792403	8366494	10148230	6636156
CHD4	5540377	5427557	9275893	8423041	16881680	6007934	6670570	9919080	8527382	6541828	5417465	2816526
GRAP1	2392429	1398655	1778166	2111083	4355706	3273032	1818939	2854043	891985,7	1507265	3345623	4002380
RPB1	741852,3	639446,6	809511,7	1568611	1080798	490804,4	535036,1	529165,8	569611,8	1180362	1525146	899030,6
NRCAM	431548,7	2108417	239365,1	2192035	178234,5	6998555	1333328	652681,9	1215205	491716,5	720826,9	347044,6
SAR1A	47830370	50794400	67201980	19303900	28685860	40493130	33974250	24618010	25970950	39450250	52256300	19986070
RB33B	209265100	255300700	286263600	133518600	194198600	191786400	268713100	167248000	223279200	199459700	244065600	139475800
RAB15	292368700	333893700	376672600	188541000	250394300	245499100	339963400	209139200	293565300	268595700	321522000	186156600
ACL6A	1002992	503888,5	512465,7	1066645	169862	169862	816132,8	605852,3	504848,7	26727,16	101525,4	101525,4
TBB4B	1864704000	1873261000	2247604000	1113355000	1017687000	1467829000	1444535000	1113837000	971491800	1372397000	1622865000	1033036000
EF1B	76669910	99281460	126455100	48254090	36286560	65186760	53059940	38475860	25702420	42044920	52817150	32229360
SELT	6291535	4563945	9421295	5246390	3911582	4296052	2539370	1556975	2794060	6891868	6576684	3563799
CLPT1	2203558	3775180	4325073	1987685	920752,3	3242173	3228961	2201236	3058933	1515643	1868514	721763,8
HCFC1	12261290	17322640	21447190	30666000	17935620	13423290	17799730	19106400	18455270	13497350	24310060	16732440
CSTF2	12012720	11259930	14175300	22564930	12120260	6694320	13424190	15309800	14901980	9724256	14088020	9653991
S10A7	2243755	2442425	2266040	3962972	6479024	6575009	10067500	1861288	1758829	8827311	9335490	13233010
NEUA	5167559	6142921	5116674	12161630	7191194	4196564	8864627	11054100	7751125	4998028	8251194	3298759
S61A1	29330280	5992584	17982830	27157800	1041986	25876450	10446300	6644037	43661300	13743420	22337290	4962392
SC23A	14331130	14779800	20704460	21550010	13426960	13607790	20991170	20808490	18116680	12089850	19534490	9883944
CSTF1	712447,2	867458,4	922683,2	971014,1	691238,2	781332	905008,5	911985,9	1016423	715993,3	1082421	497718,5
TSP4	14425,33	50688,99	17137,44	553088,4	1182310	654761,9	64938,31	98213,52	22798,33	941160,7	545077	509171,8
ISOC1	6209355	6100549	11183730	3756446	5195698	4731234	2394008	3299129	3837491	6461974	9754519	3789632
BAZ1B	5805673	6790929	8733347	17179790	11553490	4051901	8319274	10099100	8851021	8803076	15216900	7670216
NDUFA10	1165665	917185,5	932677,1	5911978	4790263	1477925	2654762	2577466	1799496	1822461	3441044	996487,2
PRP4	4628823	5419660	6172757	8145840	6888789	5560921	5004309	6906093	5004661	5900306	8362509	5074824
GUF1	966263,3	446963,8	688773,8	1037033	393069,7	1192909	1733857	1189875	472308,5	348059,2	790514,1	382199,6
K2C3	206253600	230444800	105475000	762849100	637038700	341710300	1604439000	332549500	507783900	374379300	213033700	345988400
TOP2B	19411310	18617640	30744890	26754230	25067320	34873020	31013650	17774850	20506880	20404800	30252650	12174540
TPP2	5077349	7861552	11200940	4980580	2987838	4617215	9367761	6910447	9122643	4436635	7199426	1150197
RL27	100555800	140300900	166378100	136228400	137293400	95898330	109443800	152336200	93194730	103900300	178738200	146487300
P4HA2	1455937	1373440	1729664	1471491	1491331	704755,1	727775	1516981	590686,5	1906433	1848831	1123059
NIPS1	1777104	1275915	1852958	2241672	2091321	2023216	1670951	2721189	395130,7	2250508	2964689	2384635
SRPK2	6503892	7657602	10555910	10655930	7453049	5282249	6500029	8873420	8346777	8100719	10816080	5247974
SMD2	37543430	24087360	28014410	31907330	12213220	28468070	13480380	18823490	12689430	33432290	29407600	38488620
IVD	28168780	21560680	24498160	50318850	37200030	32793780	33019880	35902860	24704610	42267690	39246640	35358350
MYO1F	8549056	11977740	14309290	1834964	2435957	14103760	8335155	19724040	7157355	11090460	9179169	937668,3
MYO1E	8549056	11977740	14309290	1834964	2435957	14103760	8335155	19724040	7157355	11090460	9179169	937668,3
RAB3C	259335100	310865700	363381500	188927300	227184400	256856100	326623600	205609700	297540500	254858800	322040000	164212600
NUP54	1774433	1083683	1434374	1906705	3544487	1089279	963595,6	1073279	374189	2407755	3519424	2020583
MPP2	729218,7	264605,5	348295,1	1600595	1711976	447467,1	452141	804839,5	216169,3	595000,8	1002836	610016,7
CO1A1	90101,29	307593,7	174608,7	7791509	2943952	1132246	871292,7	4298095	325867,5	857344,8	1661553	3935970
BPNT1	73059070	85162290	110437700	61143760	47652460	52534160	46094140	51036570	50314930	52613480	80987180	40697850
FEN1	66125610	63542930	78774940	53857060	43362330	31008060	28783630	55000480	17095680	37543760	65203720	45684970
RAB10	310768100	353714300	401254800	205044700	268427100	261912200	367950400	225911900	313203600	287278700	346574700	197228000
ACYP1	23142230	25331690	26656120	9009535	8800167	21343290	7608007	11009710	6316771	14991390	20707460	15873780
ZN207	2770142	2730290	1947115	5514724	3642439	3704738	5382703	5307532	5692811	2201028	3045057	2843015
PSB7	11251080	11151680	9583917	6605544	10929180	10781240	6559211	9126871	4216099	12245910	14928740	13015390
ANR17	755827,6	1352679	1491273	4931352	1519759	898352,7	844771,4	812779,4	1423902	1282543	2345060	534076,5
MPCP	628347200	622685300	815624800	679553900	577858800	721281400	1133338000	785195100	773761300	689572800	770223400	482056400
RDH14	3481823	2699151	3890521	5090785	4288102	3666961	4065328	4630369	3424904	5987539	5719123	3939147
SAE2	11902970	13807640	16435850	16276830	12107750	11142500	12420230	12379090	13140340	17105070	22322950	9038397
STAT1	3354933	3812988	5758232	4801790	3573713	3043379	3484592	3232675	1753426	4272509	5231400	1376496
RUFY1	9626069	6348769	10100180	9271820	2736589	7949260	7728995	7588235	6446115	8742442	13423570	6614616
PTN11	6093781	6708197	3517539	7015480	9586052	7020790	14055330	14310193	5888760	8600835	13812600	8762195
PICK1	168609,5	127890,8	302354,2	145922,8	163007,2	37590,16	1164663	330504,9	579993,3	212290,2	412244,4	205086,4
FRDA	1592851	1427687	2172383	511444,4	415079,8	1451964	350640,3	195375,3	343306,6	1074268	735088,6	394012,1
GOLP3	940491,4	890478,8	565346,9	60927,31	60927,31	463891,2	75738,1	75738,1	32276,6	454102,7	606300,8	107915,9
SMCE1	2566734	2691800	2202063	1037926	2910735	3198675	1632327	2397072	229653,2	1927139	4064306	2428946
ODBA	245714,8	256799,2	428654,8	5685303	9012424	669129,3	626302,2	411416,9	322729,1	5231049	5706942	8445767
K1C19	555512400	603503400	342560000	844653600	350041700	872030600	3814831000	484154800	1555892000	692495400	372721500	301593200
AGAP1	2250884	3584779	3604288	7295295	3015601	3149450	4137667	3314210	3844500	2993328	4449499	1574968
CLIC4	1731543	1634788	2992162	1824389	1132241	1679185	1732007	1028340	1796335	1271128	1987547	1247800
RFC4	13911580	14328250	20056350	17576260	16290310	18919630	10998640	12440690	9172882	31474520	33294370	24510270
VP33B	74917,91	34648,26	65285,68	22509,09	22509,09	22509,09	28261,72	17673,89	28261,72	17848,73	59048,1	59048,1
HABP2	2526028	1292475	1260620	5320193	13842340	6287481	1975720	6509478	484572,2	9308367	11234670	16940280
MSH6	4257425	3240592	3482366	4446769	3288500	4847489	5352717	5032068	4728253	2435829	3823007	2871173
RS16	402098900	395004000	482301000	365920600	341081300	308471400	356855300	333425500	225214000	398754100	514460900	395276400
ATX2L	2484183	1713659	1783692	4857516	2741925	1512765	2988688	4025088	4489178	2066195	3664727	2479749
SC24B	2764157	2427008	3206678	3772715	2694272	2907282	3498158	4616591	3308171	2593376	6251885	953177,2
SEPT9	10490210	11213550	16505690	12517080	10837330	9540693	14033220	10402960	13808250	12538010	20404670	8983329
PPP6	4471130	8465941	10428950	3486693	3594968	6395666	7982373	4799228	6975372	6333508	8394504	2497526
RAB21	24055220	22175670	34712150	26873440	26051690	18196480	26303410	13854340	22956930	28948280	50214050	24637590
CDK5	37921210	49075430	61330880	46310850	46686610	43827530	46039210	38444790	42251450	51561560	78104040	39183390
GNL1	9538651	5953831	9489502	5661395	6153370	10323710	6198749	8797897	5614967	12222100	17499640	10409770
PFD3	5438909	4710129	7667782	4186660	5057541	2664050	1947224	2015248	1300219	5125152	8296233	7299525
FLII	1529538	2142600	2798364	1633345	514449,6	1511359	3010398	2597637	1909240	833816,7	727507,4	862269,8
IMPA1	19516800	21048760	27212840	33303290	25418890	19059510	12360060	10828210	13787030	22800080	31279260	18370500
TOM22	4353923	3416919	3343174	1809928	2653838	5577719	4067319	3574305	841621,9	4512756	5223376	1924872
PININ	872748	376336,9	622688	847055,3	334465,7	238685,1	561183,6	981630,7	545700,3	277210,4	727043,4	484333,4
SETD3	524941,5	925943,9	1648542	969116,1	253035,6	547719	1361622	626088,4	1741395	386686,4	1522621	256387,3
MOES	102090100	96721440	118419800	69146290	29058200	81441860	152664700	85839410	107164600	60854770	91207100	40368300
KCRU	8562865	8699497	12889570	22718090	22008200	9817299	19910510	9771423	9183231	20822850	29008220	12657780
GMPPA	13094810	16986470	23635570	20424890	12994910	11623970	14580810	14050850	15259480	11103610	16012750	11625280
6PGL	21366150	26800480	31768830	21149880	23867300	17887010	11711460	15412750	8810879	15642370	27093380	17019960
ACSL3	445264,2	485352,3	673310,1	1446400	529904,2	350666,1	882281,5	662105,4	1575686	728672,9	687556,5	134917,1
ISCA2	457742,9	518535,4	1209372	731644,7	680665,8	416669,3	145149,5	69029,85	38487,1	1130399	1888831	828682
TPPC8	12282960	10584270	14575860	6374774	866092,7	8950613	13492280	13893960	9039885	9565394	6008844	962636,5
PMM2	23637050	20694120	25592240	20622830	27180410	16998110	12542380	17573210	9600632	21170740	33757250	23403010
S27A1	880265	99995,5	87239,55	2837321	896232,5	220333,5	842983,2	1689226	440172,5	627969,9	1210821	1166339
EGFR	6215330	4402629	5758820	8115889	8460199	6261654	9874930	7966622	6737878	10236990	12018880	6644402
ELP1	10358410	12717610	14112700	15430030	5042991	11222520	21212790	17367980	26079680	9287490	10521880	6315599
PDK3	4225781	3122213	4085701	5997264	4386335	3759767	7324010	7461131	3870645	4749419	3875323	1886458
RS20	146046300	78849960	163102500	134172500	48765080	77741200	32044820	72120930	38309020	76391780	97952690	76465290
BRD4	879684,4	53151010	1083389	517242,9	1545623	7325112	1655582	1011344	1996063	123284,4	36033,42	83870,69
BRD3	879684,4	53151010	1083389	517242,9	1545623	7325112	1655582	1011344	1996063	123284,4	36033,42	83870,69
YTHD3	1399269	861854,3	550457,9	4871338	2241852	645124,8	636354,3	1772266	653741,2	570543,8	675189	364813,1
CLAP1	362233,1	356701	469930,7	548040,8	232298	161573,9	475676,7	219696,2	475676,7	290341,6	515838,1	24058,13
PCSK1	5582951	3369319	5390652	910440,2	2074872	2631701	522559,6	137452,3	592167,1	4030028	4725534	4850758
RD23B	43938640	43987780	31197040	47499930	36094990	33516270	29322230	38342100	12204930	34151220	51952020	34522300
SRRM2	7403185	8195342	9476446	15182710	7194251	4611945	8230148	11079440	10842420	3874089	8515499	5443204
MOGS	18658420	17758350	22774060	30177770	22804590	23485410	38651030	32042880	32006810	24278800	29767540	17203650
AP3B2	2843031	1969121	3096601	1431559	282564,4	2676792	4201930	3387699	2739550	1092996	908267,6	59311,58
TBL2	5525536	5776228	7121664	4457910	1467588	4989255	5361063	4647885	4466906	5323196	6364731	2196203
TBCA	22499100	10548110	23971460	7077202	116421,9	11806550	3797204	6793070	937723,9	13889110	7687010	5026143
GLPK	22074300	20001350	27442230	15889560	19601090	22422930	13860030	16919050	9593698	25178900	27533700	20444860
HRAS	13279420	13143180	13002350	11645500	14743890	12349400	10466300	10369460	17675279	11426090	17607820	20294360
RASK	13279420	13143180	13002350	30268700	39538930	11490630	10466300	10369460	7675279	11426090	17607820	20294360
ARPC5	28616490	33305270	49394580	17339230	18418210	20179360	20214220	9654977	6466992	24275170	33205400	18644050
PUR1	7232480	16153380	19919540	14335780	16081270	14418320	16737810	14646400	14677990	12163680	21881710	11603540
CH10	329916500	261531700	286758700	332665600	343395200	313471900	174889000	250021800	81573410	397861100	432312200	431243600
RABE1	188583,7	166855,7	309532	279727,6	184364,6	115866,3	20800,22	122900	244983,5	575705,7	913356,7	819545
PUR4	17823730	15223840	16540160	18774700	13066000	15644350	18168510	24519900	23349880	12864660	24429640	17702420
DHB8	7166886	8281162	10002120	15414660	13898280	10481870	14544240	10954930	7057601	16604660	16595570	14715710
VP13C	1719694	2298538	3470991	2311252	1264952	1907153	3983804	1955371	5497259	2505876	3750643	787811,6
PCAT1	3315695	3053621	5173599	4488188	3356134	4489893	2948601	3888271	3258839	3748375	5735076	2774099
PREP	7407129	6591033	8670460	11386640	7488600	15079360	17083540	12363370	12342790	8508667	11591210	5316134
EEA1	1747537	1551860	1797503	4938054	5235301	1846526	1713051	2407097	1031824	2520235	2435559	2822649
PNPH	2768217	4122638	4416189	2439613	1407098	3077812	4579294	2163225	3345197	676446,7	4091906	1583277
INT3	525660,7	363174,1	900775,5	82374,26	10796,4	582873,7	730845,9	457099,6	623327,6	87451,87	26726,4	30616,55
WNK1	153326,2	140999,5	246929,4	374901,7	40083,03	54733,61	363241,1	276167,8	291917,1	114613,1	22185,51	31498,48
TIAR	4283086	234769	284387,1	5617514	32784,52	799475,8	83226,09	40723,42	586009	1464595	1102232	1406734
COEA1	69870540	43663600	50177180	33424690	2053424	41551210	46688200	36551630	42840410	28776010	49303720	33362980
LEG7	4889525	1613620	2248730	16091260	3534402	8009624	368742200	8001300	15498900	27274700	8134239	13665880
OCAD2	2336068	2540357	3393127	3159147	4476077	3401893	2859862	2764069	1135180	1809614	4274090	2767294
USP9X	6075196	7387482	8593154	11304450	5791870	6630686	10379570	7091265	11287770	5986251	10068950	3649156
RAVR1	4756809	5335203	7132581	8624299	5474136	5306081	7839925	6926642	7726238	6853219	7721048	2924024
RGPD3	1387378	1185680	2119286	2570070	2068078	1511014	2060986	2013879	2434577	2466612	2457227	1521707
RGPD4	1387378	1185680	2119286	2570070	2068078	1511014	2060986	2013879	2434577	2466612	2457227	1521707
AINX	59420560	56186860	69783210	77263390	63200110	38446520	53342300	63184910	55894220	46182590	73574340	46413480
DNLI1	2584973	3576150	3077282	4818775	3302339	4182603	4587739	5254103	3442677	2593949	3714905	3657672
ATAD1	14103900	11862850	13540010	15701920	10969240	10339830	12927860	14283610	8115497	15113600	19611550	12874880
ADT1	1035746000	1103820000	1342698000	1102383000	750840000	1130758000	2028784000	982650800	1400986000	893639500	1090389000	511915200
NACP4	19327100	18045690	23121880	16888330	17435140	15607410	13874810	11609170	7261962	16770420	26055810	17537010
SCRIB	2270423	2667896	3060845	3822617	2170414	2696325	3816766	3115884	2526156	6140372	5730865	2107845
TMM33	15658870	19892260	28763730	15610050	11573920	22650720	41069610	19106740	31131660	14159310	22421250	6654550
SPT5H	5445344	6876773	7421146	10697350	6056149	5079975	7663271	7061206	7246152	5143829	7959243	4210659
SUV3	1507640	1018062	1601111	3739397	2743403	3136954	4329991	3600831	3043015	2881183	3758253	3091295
2002-08-01	565232,7	782554,6	916836,1	2294000	886332,2	1540266	2176432	396640,2	2001519	1326618	1215145	1100097
NEUR1	23886020	21986490	24112680	22295660	26604170	23859680	17195510	28300130	12477770	36165010	39066460	34669230
CREB1	2038821	2939759	923001,3	8363271	11489330	12104790	7326560	5565527	5309648	8206408	6514419	5610629
RET4	261498,7	201725,8	348862,3	409534,4	3545744	13042730	7828794	6905009	5055326	3182703	3284127	3106262
ITA6	4805070	5952367	7435403	2938798	4854632	7282658	3513451	4335600	2906506	7598515	8326036	5431068
AL4A1	465446,3	96966,96	376122,9	602288,7	546057,5	507148,2	1173999	506853,7	426189,2	725026,6	951575,3	654764,8
SYIC	29279470	38410650	54856880	42511290	26919980	28880180	56050750	48820580	63358170	32834020	43620330	20879030
NDUFA9	10620430	3304679	6073782	5854983	3154260	6028140	9859849	6542855	6491393	7772396	7215293	4736239
FND3A	1424174	1408847	2198222	2175706	1154769	2767844	2547122	2056962	3554261	2019274	1822877	595708,7
WIPI1	1591157	1897624	2550396	3371465	3960054	1612986	2157082	2486202	2415471	750320,8	4049473	1761082
PRP4B	328277,1	334364,4	671168,9	748562,4	362640,2	198426,6	248057,4	439980,2	304271	460079,3	330711,1	176183,6
TMM65	3920447	4389105	6709928	3067519	3940848	7639908	7369537	4282385	4361114	4883505	7293573	2189055
KPNA1	3384595	3650118	3896498	4443846	5724708	8729618	4488183	3780386	2502231	5811911	6818566	2276811
AAKG1	950072	1178421	757940,9	473448,7	539422,8	462827,4	975116,7	687841,2	679497,9	874895,2	2036955	495705
ECM29	3497851	5098252	8905981	2707762	1978062	5306029	6348135	6348700	6033093	4493315	6110651	1841716
PTN6	123198,7	95570,49	112607,4	133533,2	133533,2	30342,53	114959,1	30723,97	158455	7212,79	92518,28	7212,79
CHMP3	2952475	2072657	2809515	1920456	404082,6	2216496	2073902	1575767	862145,8	2096149	3092853	1949543
EMC1	18966760	17419030	21750450	37868950	21563780	23123460	45369350	26215790	33309690	20599590	29522740	17549960
DNJA2	2527643	2293838	2763073	3163142	2441620	2879270	1607915	1586693	553028,2	3206375	2952854	2437552
SYHM	19356130	11438330	17234900	15030150	12323660	11061330	9221009	11915700	10891300	12872150	18606560	9846099
CBPD	11825490	13827760	16279560	21813320	16447370	14424060	17056530	15281750	10062960	18267080	22037170	16934440
PCYXL	1209334	1512371	2635744	1426351	645831,4	2063569	4190380	2176985	2749670	2544274	1924111	1114203
RHOG	444065,6	1944668	960254	6678214	4065198	7487646	2259454	3534763	313044,7	1485971	1783410	3129073
KRT85	1451929	131596600	1559602	2930755	2504526	16662060	3401897	1593526	5026822	745112,7	797004,3	1221530
P5CR1	143532700	129364600	169896500	130047000	132151100	162275100	160429500	155100700	113529300	160791000	165785000	130981300
DDX25	2702739	3820535	2329396	5036683	2477333	2289561	3027445	4355443	3029909	1892913	2114834	748766,2
DDX23	4614564	6984300	10253030	10846830	9452493	6350735	7825331	6292592	10300750	13925380	12068420	6182830
DYR	86271400	83250670	89311270	65328480	82353190	70323620	44437480	59943410	39247370	101289600	105171100	85336760
TIPRL	1073469	1073469	1073469	1172970	1172970	1172970	15770,12	15770,12	15770,12	18634,82	18634,82	18634,82
SCOT1	44308280	27477620	48496880	50479880	44783770	47429420	50561480	47045100	30518440	41379030	51702430	31744570
NUP98	5111530	2815648	3630633	4380280	2528317	3687062	3938776	3840509	3349295	3803108	6587901	2938975
SAE1	10754000	12712060	15259020	9281771	8306523	10085620	7516690	7463531	6466459	10010990	14511510	8379080
PR38A	2121306	2471440	2876161	5449698	988788,4	2947076	4362024	3032974	2425141	2393114	2975937	2498442
GDE1	4611247	3722589	5833353	3087533	4024545	5044553	7140691	6399923	4816157	6568717	8371622	5355039
CY1	6567722	7189458	7909500	5501201	7498810	11839040	13503340	11622270	8451008	4101270	6911874	3627417
RHG01	14075930	15287960	20532840	12895110	10284420	11810860	15951700	13965310	13873630	14347050	13228800	6548576
DHPR	40546520	31395970	49005160	41324590	44991210	20882830	13912220	16316370	15171810	49261840	70062430	41765960
PURB	31623230	19476730	30895100	34676160	33859180	26335370	17578360	19129770	11142670	41915170	36904920	36268830
VPS25	6578938	6199062	6583584	6689618	4408801	5621512	3011330	4432935	1818300	5861377	7511336	6023714
FUBP3	9695184	11047570	10384000	5542896	6004182	9710834	11971150	15482470	7272606	11899130	14685740	8339110
GAPD1	1663112	2082536	3153751	2987356	1615707	1452862	3381237	1334141	3169675	2105860	3216304	1376198
PYGB	6952243	9259897	11963240	8256912	5113051	7064944	15216190	9194299	16617080	6839215	9431210	3823952
HEM2	5846202	6941176	7495370	4101261	502513,8	3445698	5427807	5041591	2906248	4908809	3990852	3045842
K0513	1370021	817679,1	804311,2	1179536	1788585	1150676	694816	1081186	686557,8	1307105	2520404	1492302
SYF1	233891,9	192223	392948,4	266955,2	114807,4	286708,4	380229,4	259795,3	365077,1	470128,3	589728,1	404929,5
CO3A1	349673,7	290906,7	258791,5	1318219	4454016	3890662	1776090	868085,3	507429,5	3306795	3603595	4247452
ARHG2	1320409	946889,5	1219062	2889994	1166120	1020510	3125859	2150238	2564669	2739207	3022257	1693224
ECHA	76083240	47120730	65610620	165793800	72670900	73150180	127884300	85276910	89364930	86817490	95228490	62577430
WDR1	40877200	29697450	42381260	60784450	22496310	21861680	42958580	29216500	51830030	31316230	46167890	22267450
CREL1	2605758	926602,9	1489882	3750441	1581690	2298048	1620666	1476130	1254249	2752464	2201125	1632727
NASP	23854830	29635820	36760550	8555103	14746720	17382580	10987930	12883630	9449577	24793520	25955560	15295450
MET7A	2931299	2499924	2774766	2312092	2751264	2099631	5237607	3333402	2951765	4011451	4668763	2463042
1433S	696147000	836039700	837691800	496404900	559045300	493824900	631503800	403248400	229432400	503866300	701334700	510434600
SAM50	61607590	74025270	85710290	46413930	35246170	72056030	63074080	64135200	47108370	42908190	48767010	31158430
CPNE1	9997014	11523130	13317350	5583338	5460006	8224195	10794220	8288358	8949984	6597187	8478425	4171202
VP33A	24737040	28556420	37351130	22704350	18159580	16292150	14352040	19832350	9941661	22509800	29507700	17971580
PHS	219768100	273649600	180049600	117469800	123401400	165239100	80709960	103358900	71962810	86683950	163383500	128831600
CDIPT	3847156	5866586	9678486	4964022	2380928	5791756	9849873	6318880	5728355	5584165	7064191	1132818
RL26	88289200	95713510	118243900	128389100	98376160	69708700	104672300	124306000	75947450	77118640	106819200	83947520
RL26L	88289200	95713510	118243900	128389100	98376160	69708700	104672300	124306000	75947450	77118640	106819200	83947520
SC11C	33494970	7175917	31133640	38494460	3776615	41977110	9441674	20169430	23686260	38898720	52115580	36028160
LTBP3	192346,1	136684,5	144949	378572,3	54733,13	69602,32	275254,8	240960,1	112626,1	51803,41	155483,8	100548,9
ERF3A	4613232	4921588	18218250	7384538	4439515	19353770	18113910	13206990	17683900	7223457	61162030	4949985
RM02	3994210	3293244	4626598	9714524	10440450	4107917	9880797	11528630	5233221	8356735	7536854	6894434
RRAGA	2152237	816455,4	1102035	1433988	364500	1272319	2021644	972426,7	1432273	1004676	1450833	472910
PLCA	596033,2	1036529	1156294	693616,3	353018,7	1173521	1326918	953584,4	757011,9	487424,3	567293,2	71405,89
IDE	9309716	10358540	15310820	15917010	8142791	8405691	63927740	14333630	25629410	9837227	15229770	4408762
PRS6B	37798630	30291870	34414820	36847270	29983940	21628940	22499670	30496200	17254840	29183150	42569300	33208870
METK1	6537598	5456111	7380518	6245120	5766084	5212188	7934376	6278210	6016066	12535310	16431010	6143116
ATPG	85614360	74916010	68816450	132078000	129720200	89673750	97325560	116588900	60479220	108702500	151245900	116803900
BCLF1	1588078	1701951	1749468	2980021	1413897	1390255	1928430	1672051	503567,1	2134256	2664205	1224949
HBS1L	1885609	879151,4	1544743	3519219	144236,7	2061210	1839553	2499147	1948128	1690534	2459932	2061563
KRT36	91050910	53369430	1749411	226679100	1583941	10343620	10508880	914870,2	10259260	4653870	1207453	3126861
3HIDH	3223336	920609,7	1102186	3817244	1548247	4158508	5155482	3592865	1861531	2853617	3067530	1890242
CBSL	8024271	7662354	12381260	1550757	3643959	5667385	6840792	7187974	6072648	3351539	5891631	3021663
CBS	8024271	7662354	12381260	1550757	3643959	5667385	6840792	7187974	6072648	3351539	5891631	3021663
UCK2	4126116	4118996	5962381	3981386	4643448	3898243	2485834	3984582	1798427	6864726	10395590	6373074
GRB2	1500286	1156972	1535649	1486025	2160861	2393621	2287839	3258947	4029842	1321173	5221323	3176224
NED4L	8856221	10921910	12288750	10796920	9326188	10166440	12945810	9534818	13044770	5405588	16938840	7348796
KAD2	31670520	32665770	39978650	17022370	25004950	27610510	20198550	20099640	8035627	34297430	43555200	29723320
KIF5C	24233630	7413589	22232060	31446440	8423115	14726830	7846384	13269080	17685860	26185750	31767960	22632500
RL6	101100000	64656790	125716400	139716700	48091130	71287050	75416550	91464630	79135560	75534060	111775200	76436750
SEGN	13055940	16805480	16892080	7632018	12704280	11040130	5021498	7416341	3885394	4459917	13008420	6954022
UB2L3	9658751	10282730	15119660	6026790	7160546	11001920	2850595	2651080	1756413	10152620	16195220	8985174
IF4G3	6768553	12660260	12366450	10062250	6497068	8374325	15775940	11360440	17021150	8681530	12085530	5904408
ANKH1	538422,8	429653,3	332820,5	3015929	383712,4	1233276	1233071	535937,4	476399	437831,9	772914,8	594919,1
THBG	251085,3	243234,4	283744,9	1314037	2413393	5317483	2594060	1688524	1413515	3085385	2018616	1028728
CUL5	2330440	3062603	3913687	2633522	1831773	2414222	3735794	2353766	3051858	2336512	4547668	725376,2
ARPC4	49690550	58894640	74213660	26615010	34064230	38575100	63598830	29422910	32274120	37649100	52123590	22743670
WBP2	2255357	284942,2	622043	767334,1	1095816	1095816	297189,2	136995,2	475050,9	424678,6	583025,4	487366
H2AZ	5309968000	4968084000	6588212000	3244063000	3987909000	2889236000	2586378000	3510101000	1392772000	3613278000	4037624000	3236777000
H2AV	5309968000	4968084000	6588212000	3244063000	3987909000	2889236000	2586378000	3510101000	1392772000	3613278000	4037624000	3236777000
KLC2	5293361	5156303	6878684	4391698	6569763	3340074	2646084	5425739	2143937	4989524	7829766	5519400
ERN1	2979553	2597226	2608947	9800638	5932669	3755431	7318255	7227495	5148723	6111913	7063765	5418072
SNF5	55231,77	196074,2	171585,2	1344870	115980,5	216351	171328,8	98228,51	320723,8	746860,5	866267,7	141077,1
MACF1	1512466	2554701	2993069	3112239	2667094	1948614	2210600	2158574	1499595	1718788	3618789	1288186
WASF2	1080464	498194,7	60735,22	2982335	840842,3	467876,5	1531457	983740	369089,4	703678,8	1091880	887932,6
VPS4A	7367749	5565368	10676370	6475774	8021153	4194532	6730780	6358103	3866100	5785762	11230810	7440883
I3L4J1	7367749	5565368	10676370	6475774	8021153	4194532	6730780	6358103	3866100	5785762	11230810	7440883
GOGA3	401691,6	404982,4	705145,1	1404131	1683629	175094,2	515496,2	643124,8	768787,1	1514759	1725154	1455987
IMDH2	25156380	28494190	36901760	21769220	20925940	24602560	24885890	20726320	17382920	28012970	38119670	25922180
SNAG	4265113	299584,7	1855544	935761,5	343857	2652242	46313,3	1487367	524783	4133153	6624261	6794643
SRSF7	112326400	82299400	93221540	129949400	117630900	68127890	52341400	66492620	17044080	99117210	140302400	123368100
PDIA5	8605957	7341820	8507733	11969940	4960475	9082317	9389746	8594192	6267321	9614936	13475470	10227870
ODPX	3215527	2057389	3189679	11538050	5268973	4679664	4519420	5777123	3797037	6748095	6778370	7654316
ARGI1	2369268	1765009	590066,2	19931700	15843170	4282287	38688940	7171049	10257550	8609001	9074871	11118450
NU205	1788829	2805390	3862782	2664448	948417,9	2462591	5348769	2685878	5203073	1948257	1991204	600202
ABCF1	9236431	1381454	1692072	3844711	1306821	3514721	1725836	3027737	2745784	3307518	2813787	3142042
CHM2A	8890701	9242517	14608070	11149760	13197030	10863730	8731400	9250456	4256893	11778050	11144780	8869076
CALU	20178800	17913620	13467980	16345800	13412730	11454400	5673916	9104681	3230649	9796700	22395320	13547860
SEPT5	4178077	6441544	11049890	3614496	2213018	5351783	8092691	4696305	4191300	6385457	8328148	2998334
TBC9B	1446552	1510212	1175391	966495,7	506015,2	625844,4	1002038	447969	1495193	359591,2	1405008	356672,8
CELF1	11668380	12120350	15834910	10454360	9453064	9960552	8179987	9367216	6441474	10786470	10289230	5981133
DCMC	1157379	869022,7	1593995	3160240	2190596	2476778	3891756	2902842	2713736	2705471	4233847	2450849
KIF11	4376824	6277927	3893371	7646269	7277822	6359855	3571203	4135591	4538046	6120589	8365833	7528484
CNN3	1116488	813415	826218,1	252069,5	33874,17	575957,3	490327,2	408267	146904,8	193632,3	179000,9	27603,41
PYRG1	10520000	12239790	18246050	11545270	7658981	10328070	10637490	8394181	9643365	10011850	12208420	5786988
MAT2B	2381934	2269518	699903,1	2724346	4369017	1628337	1172689	5045733	1114757	3548856	4007173	3308578
AGM1	8379733	9953959	11544600	5856507	3810163	10047270	10628370	7107307	13357490	7926269	7450652	3458167
TAOK3	83874	59610,32	95477,04	417955,4	233967,7	49600,01	343595,1	141483,5	186847,1	72919,55	56416,75	75837,96
AIMP1	150199,6	22050,58	46823,16	446421,9	17974,3	45442,09	27680,02	1034206	170588,1	338514,1	368074,4	199537,1
DIP2B	3926866	3957281	6023641	5867069	3731506	4800962	6247150	4826824	7464736	4992258	5649504	5502536
FAM3C	9838859	6082704	8923658	7439069	9476352	8800901	4938385	4067730	2721762	13286400	15944310	13265250
PP1A	23502170	21532130	25471970	8182197	13026330	20633560	19427690	15567450	14793200	17152230	22993810	8708796
LRBA	7526641	9403654	10493330	16990660	10214300	9767829	16196360	11569240	22669780	9129326	16996350	5026496
PSD13	26598970	23449130	31269200	28407940	18779850	27225990	25170880	20838280	19035230	24983240	36807400	21049980
MTAP2	6535496	64051,74	178791,2	9124987	35556,62	767300,4	102682,5	81213,44	844216,9	1448407	1220975	1478829
GOGA5	391905,7	1366617	987209	2741666	1776498	1046014	622388,6	1334536	312924,1	1436903	2114995	1167325
PPID	16087480	19748440	19029280	15563570	17156280	17554080	11352430	13944240	7009944	20464730	26353190	19173080
DDX42	13269850	11679810	16551420	18835940	12959060	15764180	14750120	26833750	13900980	21561200	17029620	10649210
B4GA1	42588,42	112538,5	158077,2	392655,6	270033,4	83348,72	1644516	30674,82	1353380	709470	36519,66	847839,7
FBLL1	44775020	55658450	74482390	71845420	49043480	62187770	87861290	70802030	79843890	61861710	68893030	46323110
KT33A	6230710	179273100	2854639	7345335	8915011	18157180	14758190	2136697	6593009	2595108	2487641	1706895
NCAM1	1517458	993528,8	1016131	73713,42	1562635	1739281	996147	1205928	109723,7	1461874	1224930	1830867
DJC10	21151360	14349080	18280910	43988160	34389590	15922370	23139130	22890660	20620290	32105040	33769260	23669880
PLPHP	13598680	17662050	21462740	12489040	11311620	12473400	7387319	10745950	4152161	14292240	19010440	14772450
RS9	375975100	353112900	402635300	470520800	354208700	276282200	362260500	385781900	267395200	259898300	372882800	266693300
PSME2	2954875	5586397	8504847	2027757	3423521	4959108	3617180	535598	2649762	1845219	3075404	1910202
DX39A	90681480	112563400	131069400	88706920	84740970	91123320	115475400	107470200	108934800	95402320	136078100	73793100
MIRO1	7825236	7377236	10395190	9921651	9690586	8136169	13364410	12017850	12005150	11600850	12559860	7604975
SRBS2	19947240	15995020	18273860	14917960	8985776	15431360	9350292	18472340	6884093	19210570	20918080	13556690
RFC5	16952760	18563100	24489960	13405120	20831120	27251560	21896950	19683190	17799890	27868410	27972950	19390990
TXND5	17541290	19712820	18460030	9249319	10107980	19076740	13876460	14935720	7102400	14966030	15643160	12069940
NFS1	2208724	1222241	2076315	2436821	537692,6	4001879	4801706	4254855	2273334	2704313	348583,2	646726,2
ETFB	23091690	15136990	22845260	54717980	33061380	32288440	37349900	33583460	20883470	41673060	44203710	39477640
PPIL1	2547223	257591,3	1954302	3728635	1704797	1801635	314924,3	977096,2	667388,9	2301651	3660476	1991138
GHC1	13189040	16159360	22520660	23859360	18210950	23942950	28610270	22147510	22139690	21418130	27640630	17163200
RAB4B	211622800	261415700	285290300	137151700	196803200	195682800	270208400	167397200	223437200	201094400	249002100	141342700
HBB	459161400	151114500	207418200	364933600	428245600	493413000	516214900	406897200	236609900	644182000	504921900	504184000
GNA13	89075750	101261500	137494600	111750900	102825100	85423000	96211030	97951400	89565410	82088050	101005500	78119650
AP1G2	1338109	1286075	2359533	1526332	2296931	697892,6	2279938	2635049	2212455	1959324	2897018	1922285
MARH5	691259,5	788282,3	1121853	1931948	1544897	1762331	2100457	1667497	1569160	1565821	2255872	780880
CDK2	31029110	41923820	52750680	35312530	36253900	36185380	37392620	30299090	36813990	40443100	49202590	30635070
MUTA	2085307	1279146	1324815	1807180	2295778	1715824	2732740	2948898	1849274	743193,4	1901510	1458249
PP2BA	5353887	4621876	7041494	4603886	3425348	5282933	6808422	4678385	4867307	5653128	8292545	3630629
ARAF	567235,2	2977660	984571	1452005	1401745	1761476	1015068	1119877	1391753	1325061	632477,3	321390,7
A2MG	19526300	11173660	17654360	415682800	400239300	347123800	279145300	321022500	182373400	228392400	248002400	330521200
AMD	8056440	2562558	4702584	13356990	1243079	6815886	5154220	3544401	6180441	11271670	10278630	9651606
GALT2	273054,7	218143,5	545762,6	124098	15430,95	134090,5	86593,77	222390,4	321516	107108	19831,35	14284,46
MCM7	51842210	64646000	79875370	32399270	40363030	61979660	62925850	63948940	77282820	58577290	54853570	38316680
ELAV2	19022030	19127580	24991890	19729150	24713530	21778950	15290090	23968170	13731990	26153200	38588360	24357060
H31	3454737000	2897438000	3957159000	2328074000	1932402000	1891216000	3296471000	2953286000	2560463000	2580949000	2779068000	2137089000
H33	3454737000	2897438000	3957159000	2328074000	1932402000	1891216000	3296471000	2953286000	2560463000	2580949000	2779068000	2137089000
H31T	3454737000	2897438000	3957159000	2328074000	1932402000	1891216000	3296471000	2953286000	2560463000	2580949000	2779068000	2137089000
H32	3454737000	2897438000	3957159000	2328074000	1932402000	1891216000	3296471000	2953286000	2560463000	2580949000	2779068000	2137089000
K2C7	163595700	199599100	95250980	625493300	528228900	288552000	1431390000	277171800	415119900	309759700	172995300	293728500
IRS2	193800,9	155651	169990,2	45322,21	47957,52	14303,18	281377,1	235654,63	234925,63	233166	268930,3	210411,9
P66B	751474,2	376350,1	583230,9	974738,8	414566,1	170165,9	484540,8	917521,9	244546,2	783759,3	1126896	501617,5
SAP	2105863	139061,7	82855,37	5241812	19509,71	243669,5	49807,61	631238,9	77455,69	236530,5	99734,54	91975,2
NUP35	386865,7	474113,5	468711	787156,2	522594	787156,2	277965,1	682021,3	26942,98	255659,5	1358565	274974,2
FND3B	288049,7	107743	238930	1555868	883027,7	229826,8	378798,9	211101,1	498352,3	606970,2	837687,2	143928,7
PDS5B	1684391	2730347	3588698	4225846	3643383	3472367	5209413	4523446	3989954	2864007	3996109	3211368
PELO	3227419	922836,2	1662303	6018663	1067114	2408778	1109863	898214,6	1420262	3011320	2868957	1174837
SMU1	1344871	1188857	1572463	3454703	2104030	988454,1	1041213	2030734	2419938	1229012	2660189	1080837
P5CR2	153104500	140985600	184157000	149364000	148032100	172124500	173259500	166832800	123458000	177086800	184553300	144146800
TM9S1	2359567	1766650	1472692	5249006	3041144	1763260	4474779	3008521	3343809	1340858	3377126	2039117
EM55	751972,8	1192172	1428081	160182,7	109585,1	1644852	1708463	1374315	1558770	1432478	1626388	941510,1
DHRS1	15667430	8989506	13651680	14181590	7751150	10593020	8712459	13415320	7029212	17077330	17942320	13183710
AT2B3	5564079	6468789	9578090	7450497	4306512	9504267	14366660	10004280	10392950	5851076	7906747	3511573
RB39A	209071700	255004300	285895500	133451400	194024300	191664300	268503700	166937200	223183700	199258800	243564400	139421900
SNW1	1215509	629739,5	1689406	834630	94436,34	791625,9	844137,2	1745600	278905,4	374274,5	640737,6	296827,5
HP1B3	15289400	14188910	14683580	26379070	16474910	11137270	18293720	26342890	11177850	22236130	23393250	17196410
TMOD3	1844225	3706301	5102956	701994,2	2453259	2307367	2114607	1364097	359894,9	2821394	4166464	1668951
Q5TEC6	3441872000	2838911000	3750655000	2581867000	1923195000	1863873000	3175945000	2928905000	2377949000	2467980000	2723218000	2131039000
RB6I2	353769,1	406073,3	710098,1	806001,5	475604,7	226220,4	191882	348858,9	50960,47	1088909	859665,5	527678,8
ENAH	6377309	8272475	10632030	12490080	7178328	6053662	8984365	8099821	10126770	7239321	7854460	4929977
EMC2	590521,2	272488,1	467091,2	1622710	1099766	452851,5	843917,6	377338,2	192288,4	955296,8	1368405	1089140
HIP1R	3063137	834085,9	2667381	9467678	514344,5	2624479	935507,8	1654930	2839425	1775380	6617231	3909654
NFXL1	195600,9	308989,7	542674,6	1561289	657742,8	575257	708886,8	1145331	716687,8	124625,7	430203,2	376900,9
NUMA1	1609641	1645177	1163647	2637536	1598712	344916,1	1102629	1664826	1255290	1249119	1752687	1329701
NCK1	2057572	207627,9	2191746	2589755	1620790	1686456	435599,3	4304598	725619,1	2087057	3247456	2930568
NOP2	1706876	2451261	3190803	2700281	2634720	1894524	3612128	3548143	2391906	1237913	2026012	1904186
MTCH1	6987429	8254157	9782082	15337140	6122478	9268797	15572570	11828960	11638470	9505540	9342073	5914750
ACAD9	651977	5691667	10216420	10611360	10812030	10306690	25781790	15219930	24189330	16302370	16827380	18314920
RS27L	4174931	7001698	9585927	4274507	2446042	4014130	4041549	5314564	3361533	3161802	5194369	1455926
PAF1	1465522	736158,8	980293	2841764	2392345	1741618	1605881	1570049	1325452	902825	2190493	1672291
TBC17	1689056	1369281	1899775	2278154	1542150	1106393	2365242	1042270	2160810	1580033	2482089	904084,8
SC24A	4818759	3920478	5187034	12137100	3775495	4044621	6626872	7975995	9395955	4776104	6713627	3568377
HSP76	280037400	288370900	358231600	245470500	181679900	197506300	299196100	227081200	190490300	199780200	281178600	149097200
MBNL2	14244690	15657010	14047400	20008770	13014160	14751040	14422500	18117060	11058820	19732590	21739800	13311620
MBNL1	14244690	15657010	14047400	20008770	13014160	14751040	14422500	18117060	11058820	19732590	21739800	13311620
SNX4	4399005	4004859	4303034	849236,2	1573653	3174523	1158667	1795615	686779,4	3250299	4158010	2423988
IF2P	6405343	97263,38	3717406	14601160	509843,1	4200722	1499761	3747255	5140453	6434645	10207560	7899901
HPLN4	938572,7	758672,7	797694,1	215867,1	85774,59	300491,3	260213	596697,2	41302,45	106696,9	410838,7	481578,7
DDX31	78220,24	78220,24	22166,17	30500,62	30500,62	30500,62	278980,2	12925,36	97183,86	56312,54	5464,89	5464,89
F262	5895216	4965325	6143285	9043400	2500410	2317373	3465994	2725489	2837271	2408977	5074038	1447801
ADH1G	10529990	15891860	19401000	11950470	6455868	11675900	9813968	8438972	10553750	8958892	13078830	6048706
NFASC	367469,5	151260,5	777616	2042619	1395550	766925,6	318930,1	1154092	575001,9	1651374	1715843	1944318
LHPP	10731400	15457550	21418620	4198965	6348435	12555230	6191396	7322563	8479961	9111842	17336510	6634509
TB182	3013678	4531390	1700826	9654892	2263752	4924615	8299003	5261521	3814429	1990788	1714581	2503091
HMOX1	341046,5	2086003	2480479	3853287	3536466	4404441	1856300	2431436	2602196,8	3567946	2548317	3367223
TAU	4912508	5956629	7711923	8038053	3257652	1674998	2523226	6338218	3487566	4723506	5336117	4478244
FBLN1	1014709	2108600	1720986	11985280	17872460	33499350	21528750	21175920	11555770	9063977	13735710	11233600
DYR2	95569020	91638630	104440600	59109980	71609080	80894750	55230430	65118730	45633590	95627800	96666440	72841690
NU214	2276146	1025632	635390,2	4658957	595732,3	1167926	1237451	1282486	1677591	2444644	4517044	1520899
GCP3	427187,1	216585,3	76939,76	277209,8	162577,2	148104,6	391938,4	321443,7	688054,9	216752,3	525905,5	143212,9
NU160	1399787	3573493	3994070	4715246	1650551	4266101	11643430	3262423	9031403	3698707	3557681	1073090
SCG3	4193943	9407217	9438099	13638110	17822630	9595963	2225880	4693552	1760295	9738338	15056910	27043660
PGAP1	22637170	24639270	28365890	32743730	15334170	31299040	59736580	38506880	53835600	18440220	29329730	13048340
MPP6	455623,9	306009,5	615282,3	501243,1	896760,1	1187843	612637,1	645541,4	173559,4	684207,6	638193,2	1231736
GSTM1	4208210	3160058	4062344	94805460	94359640	14630640	51823100	58168661	42218880	46352140	47963230	36362040
ZC11A	1266804	934260,6	2609483	609950,4	945933,5	353607,5	1582448	2354751	1803089	1979398	2554244	1349211
UGPA	212395,2	212395,2	376511,7	374064,1	284346,8	76915,61	177772,9	104603,2	466738,5	438186,8	311079,4	419687,2
DACH1	1070308	1735798	1745182	3495716	2262087	1402236	984825,1	1566093	1287308	1889005	3621515	2286057
PROS	23911420	8343112	18317470	19659000	9572339	38505190	71336540	23769940	22948380	34466020	32364820	15328920
FKBP9	20975230	25849760	30541270	24856040	18987850	22713030	16421380	20014240	16359150	24122060	31938910	21693280
DPYL1	131917700	145145700	182536500	135110100	77130580	91803780	126233700	127297900	116677200	83796130	113106800	67219100
CYFP2	3616616	3386096	5168717	8371309	5426401	4291729	7846116	5435691	8616272	4019400	8155613	4006975
PAPS1	7320505	8177949	11845280	5129758	4681884	4732512	5441651	3805936	3751689	4550965	8775659	3362128
COF2	116023700	127585300	173927000	66163600	69390190	88108020	73181910	57980550	46232260	94569150	124580000	68823850
RS27	29152440	30653310	33602570	29274230	33854050	21327780	21398920	32371390	13928770	26633360	40780020	28625760
GBRL2	12470120	11697530	11638330	5046896	14210750	9667695	4797548	4537917	3389675	8500021	10334670	8030767
STRN3	3523929	2152534	3822558	2380243	1188182	1536793	4243290	3082351	2779153	2249636	2756498	814418,6
5NTC	6924209	9428218	12440510	5663130	3427744	5979190	9165171	4795394	9786745	3099809	6050858	1600385
PZP	6994499	6101380	11197980	92328210	61252820	150947000	115636800	84274260	104689700	89123390	105053800	71415840
WAPL	395102,5	486860,1	672998,2	347201,6	159189,3	212183,1	355468,6	373883,9	121248,2	262179,5	390237,6	83439,73
CND1	2118602	2662752	4446681	9373502	10430360	1454701	2395018	1959427	2226564	2451142	2918559	9328226
E41L3	60917,94	160411,7	247804	116315,4	59020,81	52801,44	120594	195457,7	71331,44	24596,83	122558	80252,31
TMED5	18289480	15549940	19273950	17599300	27645000	23470480	14823550	16055600	7433591	25819150	30642240	24567300
BRD2	1758711	5063042	2664819	1844269	1684198	1790790	1847918	1196265	2265393	862130,7	730856,3	401996,5
CSN7B	57514,4	190670,7	156959,4	45849,74	27236,13	67475,02	102478,8	204876,4	246471,4	37909,81	178428,4	61497,57
UB2E1	2807532	2389677	2890315	2295322	2733193	2190656	1385185	1795519	731929,2	2184618	3204133	2404308
ILK	2615337	1558636	3506468	4509665	4126374	2425258	3781560	3367440	2179319	4251722	3871436	3421540
DOCK7	749202,1	607659	955282,1	468866,4	329985,7	147182,2	1093876	496448	815555	234720,8	227486,7	36372,84
K132L	3685119	2765954	2302177	4350100	1708971	1776443	3762435	5565221	1271842	5274066	5995262	6846615
GSTM3	4704572	5488815	6422674	98284800	7355932	11926170	5958094	7237739	5227470	19391400	15701270	15683130
GAK	25768,06	67110,99	67110,99	73781,52	30583,15	30583,15	471707,9	81914,91	471707,9	37902,86	59587,88	51416,61
H2B1K	7851503000	8477047000	11164280000	5438431000	4472672000	4250331000	7348546000	7472707000	4722411000	4258711000	4659187000	4045744000
H2BFS	7851503000	8477047000	11164280000	5438431000	4472672000	4250331000	7348546000	7472707000	4722411000	4258711000	4659187000	4045744000
H2B1D	7851503000	8477047000	11164280000	5438431000	4472672000	4250331000	7348546000	7472707000	4722411000	4258711000	4659187000	4045744000
H2B1C	7851503000	8477047000	11164280000	5438431000	4472672000	4250331000	7348546000	7472707000	4722411000	4258711000	4659187000	4045744000
H2B2F	7851503000	8477047000	11164280000	5438431000	4472672000	4250331000	7348546000	7472707000	4722411000	4258711000	4659187000	4045744000
H2B1H	7851503000	8477047000	11164280000	5438431000	4472672000	4250331000	7348546000	7472707000	4722411000	4258711000	4659187000	4045744000
H2B1N	7851503000	8477047000	11164280000	5438431000	4472672000	4250331000	7348546000	7472707000	4722411000	4258711000	4659187000	4045744000
H2B1M	7851503000	8477047000	11164280000	5438431000	4472672000	4250331000	7348546000	7472707000	4722411000	4258711000	4659187000	4045744000
H2B1L	7851503000	8477047000	11164280000	5438431000	4472672000	4250331000	7348546000	7472707000	4722411000	4258711000	4659187000	4045744000
AP1G1	5569366	8026756	9353547	4404920	3456425	5575894	13559720	5414938	18081030	2254230	6636345	2796340
PGTA	4209189	6141531	7660226	5083144	3057308	4505166	5174150	4452568	6818925	4585181	6521733	1329151
WRIP1	83297,3	253770,4	253770,4	121761,3	121761,3	121761,3	22896,76	22896,76	60401,58	22896,76	22896,76	60401,58
P4R3A	369206,9	627344,8	1121807	1629127	327092,7	437846,8	421703,4	328907,4	1424039	636051,2	1479994	224747,6
SMAD1	1323716	1526867	1461063	1187406	1339495	1505178	976209,3	770986,6	1132804	834645,6	2161779	1067609
ARI1	1243693	894980,8	1179707	904027,3	286141	885604,6	964501,7	253706	1265587	713815,9	1868093	701250,8
SUCB2	5870709	4551879	6453232	10310780	6875188	8722623	10232130	8616623	8431276	8945436	10857290	7093757
TKT	54720990	39474340	76672100	58761840	22219150	52355080	47344040	59447120	66936370	58893540	90418910	53427350
CCS	3344319	4592174	1988999	6973672	8473064	6354139	6059860	5293576	7090666	1602736	6004492	5439381
RL38	12038610	11082320	8074204	27967730	32843210	6800547	4565213	20425450	3424667	8500282	12403140	21945640
UBFD1	179222,6	197805,1	89447,09	26361,87	293892	168021,2	278376,5	130506,5	247933,3	109123,7	406259,3	652607,4
RBM25	6287039	4643595	2787303	9124586	5877165	3336016	7033651	8496820	3344529	7631566	6537326	6217343
PLEC	2122008	2016660	1967282	4535406	1088102	1308902	18295950	3620204	4662421	1350080	2567972	1332756
DCPS	7247624	8417060	10964370	3802920	6049191	8204588	7094178	7773531	6783693	5964044	11312630	6084441
FL2D	226973,7	15307,83	109202,3	23289,76	189138	23289,76	34097,57	12439,91	579478,3	32668,78	125546,3	19347,04
NUP85	77979,71	695568,6	1701441	312436,3	174724	1115252	1635536	1692126	2888196	2254542	788664,1	268471,6
CUL4B	1858631	868437,1	1235734	2017143	470685,6	580185,6	1549586	865778,9	1042912	185984,6	507220	136728,6
VPP2	626247,9	274178,9	902235,4	805392,8	529828	88949,87	44798,97	10038,63	384102,7	1459215	1158965	272982,2
EMC7	1402561	2066356	4080671	256985,6	1294824	2207897	3773220	1913636	2410953	3134864	2909559	1510065
MSH2	6286418	4449724	7971846	6727891	7155147	9224492	6720892	8452854	7249438	8367312	7053565	5000646
BDH	13617400	16072300	20868070	21643550	21116860	23234600	28120360	23729860	16270040	27143610	20878680	19445490
MAOA	16075390	12427650	8999520	35929440	24162480	26582333	20528150	20693780	6906450	8693147	7116302	13875800
WASL	3676713	2133352	4082495	7689703	2755938	2019915	5446056	6741586	5431157	2642873	3834378	2715885
THOC6	1174297	767734,4	1148815	1338987	2398225	525924,5	1419829	861699,1	1170843	1374797	3712919	1147074
MYCB2	1409834	935346,5	1406034	1419936	885491,8	723673,8	1423516	893387,3	705117,3	2136802	2289561	1163377
XPO7	1302724	2722037	3661988	3014936	2165221	1755404	2823269	1564562	3271487	868440,9	3920301	662753,5
CPSF7	1902401	2599937	2910866	5772805	3904266	2864375	5747671	4055471	10116500	3838485	5239350	1600498
AVL9	2709594	2687435	4246529	3133501	2552472	2235456	4209198	2851472	3158804	3320405	5035632	2961901
CNOT2	567839,7	271555,7	215639,7	677215,8	299760,4	142051	346340,4	507127,6	385010,5	512483,2	763307,4	654360,9
CAN2	11774640	10722540	13475600	12614340	10359730	9773837	8526567	7880997	11412870	9405162	10167330	6486833
JIP4	773525,2	902335,5	1984364	2184002	1465438	715204,4	1547010	1589493	1121276	745666,7	111087,3	111087,3
LC7L2	6640412	8499265	12256420	8980844	4342379	5981980	3731260	3334160	3285959	6010500	8047175	4034969
HEM6	2268245	3035436	3796275	3118365	2924073	6807181	5128001	5484700	3560338	3612132	6108102	4346052
HGF	123688,6	206459,8	226512,9	795286,6	2125328	1959715	547035,1	1271987	1068694	844128	1547676	949562
PPIG	1663181	2413051	2790019	4001475	2366715	2414084	1919029	3580920	1344205	1923163	2012621	2283611
THIL	44344490	35512180	28568050	84640730	79440250	44314940	31863960	62300530	17914270	45692800	56213760	63278220
EIF3H	3390218	932937,3	967649,9	2056686	4179761	12715,92	22735,16	1287320	367236,8	2333971	5424643	2735646
BACE2	304912,5	1321317	1320658	293280,9	525986,3	933559,3	1016660	418832,9	496829,1	536468,4	572907,2	464971,8
HSP13	8232173	7741522	11044300	6568833	9696451	8053451	5224363	8363473	4842637	4315743	11346020	8229796
KTHY	1523593	1910332	2081165	947538,4	2622408	2521392	1589854	1518966	1987805	3469265	3814336	3341497
PSME4	1094680	4021457	3776324	1423871	1824251	2117462	15107330	1476321	5324119	1463851	2016346	1084030
DX39B	92943760	117081200	137863700	89507800	88339040	95776690	120664900	112264200	112713800	98096160	142694900	77323560
CTBL1	5438449	6957229	8179727	4308371	5137429	7157952	5001640	5009350	2772412	6583938	9377218	6450766
INT4	67284,82	42909,94	57049,81	42141,46	171303,6	42141,46	208446,5	94016	532084,1	62856,52	21296,89	16248,3
CYCS	1211420	877946,6	141670,5	2440377	3307772	2481609	998703,1	1992035	5909174	610441,5	2504608	258286,5
ARL2	1473051	1242390	2359492	719316,9	964060,2	1135596	905870,4	194599,5	2152998	2266060	2167245	351170,4
TBA4B	28878280	30274220	37728140	27027480	14059200	28695240	36692200	26333340	26848930	15076890	21565750	9038853
AS3MT	602605,5	1015091	924178,7	744796,9	842555,7	932213,4	671533	510445,2	290876	482774,1	1134436	768363,5
UBA6	6539436	6445450	9952276	4369914	4863328	6585239	8372826	6027577	9912983	7350337	9842294	2548980
CPSF1	38638640	39725610	56999350	30035140	30638400	38216720	20092290	26020100	13393310	52792050	57352460	46008940
ANXA3	3563338	4154888	4673256	12377100	7408796	7624799	9331012	9428601	7329127	4777819	10641030	8807591
CDC73	251924,2	605900,8	999317,3	683022,5	611438,3	613772,9	945044,9	1118513	478651,4	567026,6	888891,4	922919,3
THOC4	27293700	26089210	31011130	23629790	28780630	15896850	9483492	16101290	7023743	32009230	40695300	33241770
STX6	119225,9	204957	231941,5	103390,9	193687,1	154091,1	141091,2	48776,22	48776,22	381901,3	41046,58	31248,16
NEMF	550543,1	2462269	2813784	237789,2	6354774	990357,3	3322816	1280349	2360339	1091481	427231,6	684012,3
RAB8A	305769100	343399800	412850000	218051500	261157000	270441100	357525900	226084600	331982600	296377800	359818700	195513500
RAB8B	305669700	343318300	412583500	218051500	261157000	269786200	357433300	225965000	331761000	296090900	359587200	195501900
TF2B	322715,7	576043,9	533150,2	238145,8	343515,5	70276,54	1177611	432204,5	642922,9	767490,8	1499498	627819,6
VTA1	664972,9	968191,9	2781968	1695646	735380	734201,3	1975349	1283744	873285,8	1253802	1282982	199990,2
ARL8A	45190430	53363920	63771830	63738860	53727070	55796970	81125390	46768440	52226820	66439860	75956040	45142180
H2AW	49463450	49975010	70825580	85620470	87525840	51593730	73539940	76660820	50012720	79608250	99476220	73350110
CROCC	16869080	19653760	21909690	35234880	17078640	10138160	33577080	20991290	16196000	15078350	25646550	19421180
HCDH	31061250	25791610	35919070	53415970	46065560	27665550	33709400	26295120	24606560	26357810	33494050	22419630
ACSL1	6256005	6685873	11748040	5912056	6202241	8250623	16776590	8331075	11959580	12774440	12486650	3039138
RSU1	38642,2	50127,95	8704,29	40699,41	40699,41	40699,41	22155,22	22155,22	22155,22	275901,1	275901,1	275901,1
SUMO5	10729130	11052810	13641450	13373600	13010660	5958788	5558913	7650619	7981050	11974220	15069640	11688110
SUMO1	10729130	11052810	13641450	13373600	13010660	5958788	5558913	7650619	7981050	11974220	15069640	11688110
D39U1	3204433	2359728	3932959	2664328	3529648	4450364	5196810	3973381	2917018	4353952	1195978	2120037
H2B1J	6927844000	7500820000	9869933000	4812980000	4245368000	3658315000	6322003000	6490651000	4146690000	3910744000	4255813000	3876161000
H2B1O	6927844000	7500820000	9869933000	4812980000	4245368000	3658315000	6322003000	6490651000	4146690000	3910744000	4255813000	3876161000
H2B1B	6927844000	7500820000	9869933000	4812980000	4245368000	3658315000	6322003000	6490651000	4146690000	3910744000	4255813000	3876161000
H2B2E	6927844000	7500820000	9869933000	4812980000	4245368000	3658315000	6322003000	6490651000	4146690000	3910744000	4255813000	3876161000
RL35A	72664920	75264260	115900400	41355180	29576500	48326520	98486510	75719150	66724530	68085710	57628690	31991950
UGDH	712847	945848,3	1728347	952951,2	499281,7	1489334	2292285	829997,8	1889785	1053361	1753474	292600,9
CK5P3	2523004	3299302	4206916	1550413	2305086	2151476	1389012	2481364	1180217	4280190	3730867	2821772
DENR	7960711	7431151	8176036	5926588	2825213	5422583	1144361	2095594	1838653	7198660	9113162	6450235
AUHM	1981723	1128836	1021094	1010638	1984122	2656841	2594197	2089889	1650274	1967163	4599708	1715432
UBA3	1945640	2459140	4133907	2599374	1330846	3408525	5204622	2615211	3360360	3349346	3505440	2444456
DMXL2	436893,5	471817,7	526008,3	1794683	1061739	595330,1	839135,2	767164,8	1293456	533746,4	700749,7	289931,3
CYBP	12557020	11059790	13990140	9364121	7301409	8104446	9226396	7732288	5988670	8959374	14285680	9354420
CLAP2	1404962	1089813	1808258	2940550	1616578	1130953	867054,6	1538294	582801,4	1198570	2064573	673178,5
NAGK	11267290	13014300	16902060	8226426	10277610	10262100	12473480	11190510	10887910	9450428	13456510	7575632
SKIV2	908004,3	498055,3	1487324	606988,2	180197,1	456042,3	1234521	426374,5	1073840	467892,9	539479,7	493339,3
AN32D	78554,09	292170,4	462913,8	230985,9	307791,7	161914,9	22143,24	257587,6	154866,2	22143,24	257587,6	154866,2
AN32A	78554,09	292170,4	462913,8	230985,9	307791,7	161914,9	22143,24	257587,6	154866,2	22143,24	257587,6	154866,2
AN32B	78554,09	292170,4	462913,8	230985,9	307791,7	161914,9	22143,24	257587,6	154866,2	22143,24	257587,6	154866,2
MPRI	7613279	7975969	8717549	11065610	9671029	9563063	14297770	14363250	11322090	7322201	10020880	9410295
NCKP1	374297,9	480631	920738,1	329860	35021,24	50952,86	1526946	273782,7	607485,6	239983,7	566773,3	21716,94
LSM7	10772780	11234160	16247470	6851955	6803280	11437790	2861024	5261041	3667408	4419095	5160948	2322666
CD11B	537840,2	631896,3	637511,7	1629428	107711,7	1118348	684720,2	924937	706788,4	447462,7	1150636	467519,6
CD11A	537840,2	631896,3	637511,7	1629428	107711,7	1118348	684720,2	924937	706788,4	447462,7	1150636	467519,6
EFGM	236772,6	221250,3	206740,6	320293,8	320293,8	177694,8	266633,2	291841,8	134172,8	79121,05	148767,1	79121,05
GGA1	5415146	6588082	7940764	5325797	5026656	5223778	6154640	6056036	6021393	12116760	20214310	42144190
EMC6	2038745	2108553	2617868	598375,4	1165346	2383603	2895912	2297539	1550152	1806275	3412645	1333494
CSTF3	1564041	2560011	1561618	1628668	1486213	2590750	2426337	2240897	2846498	910710,1	3078580	808780,6
CLU	1526248	2586989	4752299	3554874	1311067	1855668	4609536	2799808	5109516	1859868	4413363	1639060
VASP	158766,5	45748,07	270748,3	97214,27	54136,12	233736,6	23046,96	69977,56	36525,75	134717,8	203302	160522,1
ELP2	1839204	81943,25	407018,7	380942,3	1147540	67416	138584,9	46497,02	78545,46	85186,6	439148,6	839424,6
GOGB1	503809,9	294119,9	15061,36	1885313	579671,2	220597,1	372059,1	943037,1	343851,7	373911,4	5312692	6388192
SCYL1	8549056	8829492	9354297	10027240	5473727	5532918	9007765	8351672	8622642	8682359	12358270	7417359
YES	32618210	42491220	52924080	42488840	39464200	37126050	38706020	31154020	37833210	41505750	50263410	31162740
PRPS2	64650820	64043230	91253280	49655430	40333830	49440160	37073300	42057520	33490340	45442140	63310470	29468660
RENR	14818230	16777900	14906060	13275730	6337243	16863500	13455120	13044190	13060480	15740440	18260140	17109580
LGUL	5622944	7116631	7922998	3992347	3990405	5569127	7784942	2198101	2273164	4097719	7216616	3442869
PR40A	5059391	3220697	5094620	9938157	5271762	3977335	6312112	5592080	5652303	3231106	7498637	3715909
PA1B3	58782430	54953700	70671310	37092480	35439690	50257010	28091070	31006020	32750990	58199820	67013510	37754990
PRDX2	11313840	18285730	10139480	51127840	46309940	50557900	30597870	31115940	33094000	40448110	44239974	43411783
DEN4C	653091,2	911436,3	802985	2041964	1695976	1049585	1079418	1088443	1273237	356016,2	640875,5	141474,2
4F2	42539300	37704660	41722460	52731220	56850780	45565900	34138360	39553480	22967260	33910520	41422210	41466530
YPEL5	102179,8	178675,6	236494,1	120958,5	224264,2	505059,4	213341,7	166888	207309,8	173901,2	82803,99	81666,34
MTCL1	365893,3	1373433	350068,6	1700079	812230,7	81655,49	1235677	137628,1	1551182	471797,5	1000864	508963,9
SNTB2	386600,3	517566,2	1758325	1633921	1339732	569870,2	1140109	987030,1	443481,4	613457,6	1217160	218882,7
EI2BG	3156492	3937837	6372465	1302379	1874320	2801198	5034156	3346413	3431190	3586346	4192608	2163562
ARC1A	860729,9	7422,69	880023,5	340603,8	21009,76	789087,6	94508,22	94508,22	1412468	59835,11	270200,1	23446,22
CELF2	7497814	6470103	7530518	2682889	1870484	6465345	7454752	6132785	2463562	4901189	3579906	2825328
MYH11	24777730	15307530	18448870	48384710	25385090	17562250	16740380	24119780	16171320	28525680	31658590	24175910
TTC13	59048,36	176297,4	150681,7	109277,3	109277,3	109277,3	164076,1	132522,5	61801,35	117123,2	78319,32	127010,6
RL21	26975450	17258250	20306000	10076780	13872740	14010290	18619130	21800030	12447050	16038510	21209060	18094750
KAPCA	913527,2	768881,6	1030446	1406819	1575771	768407,3	769482,9	258598,9	1494481	952398,9	1598759	559452,4
KAPCB	913527,2	768881,6	1030446	1406819	1575771	768407,3	769482,9	258598,9	1494481	952398,9	1598759	559452,4
GYS1	3767449	4101486	5795044	2744813	2840002	2467912	5701362	4779189	6613062	5104021	4449094	2454018
PAK4	4810455	20766630	26670820	713663,1	685264,7	39357800	19759090	10846240	1312324	622461,8	1026933	418968,1
ATP5E	34860010	33849630	32551780	4379849	3454213	51374060	40929080	43619810	39034810	46759690	5228202	50417530
AT5EL	54860010	33849630	42551780	5379849	3454213	51374060	40929080	43619810	19034810	16759690	5228202	10417530
SAR1B	47166750	38891080	54232080	14506910	20797620	30438400	24694570	16144160	21646170	34256370	43884300	17559960
RTN3	11942770	15460490	19323640	4942540	11882800	11398310	13848530	8650995	9503975	8099901	10878140	4177875
MBLC2	462997,2	621078	375183,8	684107	130796,1	1789734	930495,4	469321,7	358670,1	629157,6	689137,6	144547,3
CO1A2	37352,57	228416,2	245013,6	1678761	257421,6	290676,2	72962	47052,59	213780	3173871	165913,6	146960
NCBP1	1217751	1688068	2189921	294898,6	237171,2	1178422	1990917	1049772	3078995	238305,4	1041069	89187,02
A0A1B0GUL7	14825960	14206880	17607900	8597996	13556950	13148250	10994440	13153340	8777027	13870560	21780960	14332690
TMM43	10988870	9285584	12950160	1652546	12065100	10594750	16586790	12723110	8389565	10146020	6941847	6605385
ISCU	3626724	1539801	2200876	1952029	3627210	2776448	1500031	1999753	755601,1	5476938	7301321	4640823
LIMS1	2740697	2453404	2762864	3500098	2412298	2221859	2342155	2004292	1677171	2078479	2261730	1254110
LIMS2	2740697	2453404	2762864	3500098	2412298	2221859	2342155	2004292	1677171	2078479	2261730	1254110
PABP4	51103800	52847430	72634530	62969670	47850330	50308190	55518800	59264970	36586520	56005040	69094530	48730770
SRSF4	114787200	132642800	170581800	176582700	111251000	106253500	129911500	137320200	104603600	103197900	123433900	86852100
UBP8	940987,2	1271262	2161451	1974096	1051513	581180,2	1686630	1973701	2105588	663998,2	1852865	1420155
MON2	1039415	1505555	1975481	3045134	1234740	1207736	2697794	2034219	3211502	1782065	1859115	1177417
SMCA2	13015170	13215400	9221302	18387860	21761500	21078220	6285266	14824380	6869604	22339870	18890390	23400780
WDR26	487914,8	239181,4	73993,33	107216,7	107216,7	107216,7	95191,8	54288,38	184826,3	23799	369020,1	15198,32
PIGS	1484988	1323444	1460818	5824636	3067691	1570386	3979511	3203050	3520344	1521518	3124253	1704213
EDEM3	192555,3	229996,1	836284,8	686042,3	1311316	478134,1	782233,3	515330,4	205060,5	180292,7	1244794	1282536
SORL	239200,9	39212,44	78909,89	113626,7	137697,2	146133,6	307156,7	106892,1	573214,3	95811,19	187803,2	95811,19
ACTBL	561471400	702785400	939726500	906177800	435810300	455365900	695583100	422039300	437338400	456564400	674841400	349659900
RB3GP	3575141	3908641	1614772	81572250	193781600	61004220	42699480	119261900	8977029	15171110	51443710	114922400
ELP3	2005333	3907096	5035151	3060374	1901904	3598435	5360445	3292156	2909910	1381078	2858283	947955,7
RL34	69582910	79540970	92586770	86593580	76914930	52446680	75514660	83512410	47216230	61853420	86164620	61579190
GDE	2059296	1735498	2939575	303003,2	1424293	1206428	4303360	1587829	4948132	1602652	3556345	712344,7
DHR13	982701,5	1112831	1266722	1260011	1136288	1604631	1485348	1451486	1152712	2473758	1285684	262344,2
CE170	3688868	4307586	5489514	6298875	4049989	2532387	2975904	5554410	2544050	2740856	4437722	3491758
NT5D2	2320630	3755497	4517198	3752925	1705005	3857209	9549591	6087956	7151361	1630538	3868784	740516,9
MAGD1	2283869	2368896	2786811	7900725	2592611	3651737	7326230	5184734	4805461	3433715	5856925	1586181
HIBCH	958863,3	347293,9	1089609	1853618	4387264	1261766	846533,7	727620,8	1216770	745153,6	33441060	6493766
AK1BF	23929100	19668460	32381850	37310470	1246845	25134290	11719770	16898030	17643310	25031020	37721600	20011360
LMNB2	15740380	14448840	16567510	25642980	16613620	12589490	14139480	19386590	12702240	12364550	17489610	14749860
MY18A	334942,7	268511,7	151696,5	666025,1	297747	497895,6	196365,9	555314,8	283620,3	127428,9	405071,4	236152,1
UCKL1	2716102	3566567	4552234	4928721	2251247	3618272	4279382	3933196	4068007	3482079	4166213	2943044
PLOD3	2985225	2530970	4001233	4984634	4526785	3688823	4679705	4301447	4128636	3748708	4603921	3004167
CO5	7509859	5160426	6480725	15120190	15856500	10122570	9819541	8212366	6276053	11160020	13352520	11441080
GLRX3	1192233	2295819	3671461	706065,5	454545,7	1825341	2075216	1102272	1082107	1138901	1699712	279946,1
RS29	22923230	18683680	36362460	7108766	4609181	14253410	8004762	10942920	5724250	13871660	19012880	9746093
LYPA2	16686630	12122550	18982530	10644280	5007195	9213459	8887441	6513832	6823201	10765950	13443560	5817133
RALA	7254542	6460463	7715378	7894360	5654599	6922750	8339137	6038136	4423993	7690868	10422390	6668242
RALB	7254542	6460463	7715378	7894360	5654599	6922750	8339137	6038136	4423993	7690868	10422390	6668242
DYN3	5944249	3889146	4934038	9452732	6565840	3533879	6123002	4879893	6773482	3936692	7053697	4581090
PACN2	1468542	1689601	2389722	2936875	4729858	1879318	908800,2	1648219	544506,3	1128009	4515978	1589254
TACC1	305546,9	105089,2	113833,4	937889,7	454092,7	937889,7	136073	708834,6	202814,9	126513,1	127895	63912,51
GCLC	269909	33732,76	293904,9	751858,9	886282,6	857780,5	369923,1	206561,9	329144,3	517032,9	532107,9	502906,8
ZDHC6	48028,45	19942,21	47867,93	75777,36	75777,36	75777,36	15781,69	15781,69	15781,69	16785,7	16785,7	16785,7
NBEA	4065529	4680496	3769046	5460677	4033667	5571201	8417928	7017499	12081620	4450608	7875003	1914950
VLDLR	1871709	1557637	2074312	964013,6	162293,1	829402	857118	559995,1	1156459	1256401	1470473	103984,9
TPC6B	1958850	615191,1	1106511	6741534	6635500	4477114	2804636	2660212	1962874	5425650	6048593	6264748
VP13A	3383049	3916468	4453722	5801977	3257112	2173889	3802436	3929212	4938721	1064456	2445172	1568976
TAPT1	96557500	88320910	70561530	165385800	127491200	83132110	116268800	140317800	70310030	80214440	116164400	97476130
DYL2	23244270	23251950	30943070	4071112	994103,8	20636400	15671890	13231080	9514332	19547570	21232730	5731104
ZPR1	512757,3	23048,18	352106,3	84666,2	229514,3	57907,06	494786,6	620380,1	163047,3	156275,9	156275,9	194797,2
SEC20	4891023	4230093	2907231	4094036	5255378	5486947	1367755	3411289	1244178	5380162	7637232	7075765
AQR	898190,9	530243,5	1150832	1136526	1392556	1015724	2310080	1309721	1596041	2112943	1981810	1222064
MPPA	593397,8	670288,1	891280,9	4757535	348637,5	766421,4	384495,1	475426,1	1043011	893262,8	816971	265671,5
DNM3A	236493,6	391040,5	850288,7	1170788	923050	206400,4	366721,4	392835	340179,6	691633,7	577957,2	274781,4
RANB3	4337852	5720160	6849984	4859122	3049282	4330681	3161483	2715667	1976141	4459628	4152813	3298198
KEAP1	478826	406203,1	592334,8	2688223	2547125	2618435	1163976	1112645	664459,1	1238354	1338438	1781234
CAPS1	13468030	15592870	16017070	17287260	21042680	20914250	11908440	13418640	11316250	22558920	21925280	27821030
OS9	14661,88	71751,21	1947688	445009,5	445009,5	52838,9	99065,86	149647,9	211360,9	135206,8	135206,8	135206,8
VCIP1	960995,4	993804,8	1106102	1288632	1207543	602575,1	1757454	1538845	2005672	1041032	1584689	1276799
KC1A	2558471	3382325	4550815	3007048	2832764	1938239	8328413	3420473	3212704	2599985	3104830	1498752
MAGD2	1354588	2217754	2871245	6112993	2650763	2161216	4855197	3720583	2776033	1106985	2788359	1740028
ERGI2	2342335	2182547	3583414	2592124	698959,3	3511473	4957894	2849835	3336346	1612767	1700851	810378,8
RABX5	865010,3	851723,8	911742,6	150089,9	177889,5	956846,1	1021034	444548,5	749032,7	944133,2	875023	287418,2
GGT7	190743,6	308593,3	222248,1	47458,64	212102	386587,1	313752,9	290958,8	42252,01	219391,8	298244,6	172417,3
ECHM	7913452	1513074	1715155	10593190	4738122	7114724	7042492	5277994	3006959	3242671	2096004	6381700
TMX3	19219200	549766,9	26470080	21208200	21623910	24954380	30399620	15335280	19733090	23995290	28715290	10478190
UBE2Z	4424804	4034641	4202133	2694840	2890026	2518849	1835552	2451990	1769585	2179826	3651284	2551724
DHX30	746786,7	712190,7	1360619	1893528	882571,2	1304056	1780737	1353637	1538500	669688,6	1218371	925563,8
LRC40	2004226	1917660	3592352	1156376	3249821	2140621	1787978	2020412	1769243	3340550	3802891	2497436
KI13B	532376,9	287516,3	216179,5	633660,3	979043,1	70809,41	324705	501885,8	461236,1	625280,5	1130790	497663,9
PCM1	13882330	1818931	16653800	14768900	347918,2	14797780	3242550	6110242	25666780	9680803	15620490	4750321
TP53B	499858,2	454040,4	741615,3	583946	155208,9	488025,7	1019042	660922,3	934118	541740	363470,1	63370,62
MCES	336577,7	114282,2	460924,2	174937	692900,8	5095924	521133,5	6400563	9320660	189331,4	165904,5	4574842
PDLI5	2567067	2744506	4828764	4711603	4361693	2942104	5187336	4100064	3260640	4295717	4459188	3816452
ILKAP	3349537	2926555	3004385	4434468	3019435	2320227	3546733	4938661	2600568	5382142	5895164	4505275
GPAA1	3065005	3691939	4562256	4187142	1658888	5007668	10373090	3824472	8544945	4955538	5036595	1091255
STRBP	4740063	5741862	7758140	2196140	1403624	3197467	4767554	3315713	5420779	2917258	4432949	1152492
CNTP1	450483,5	65989,26	289710,7	1213674	394968,4	298136	809719,7	765761,9	390220	821114	1342825	713926,4
MBD2	10408,76	31898,61	56945,3	925748,7	925748,7	262364,3	11086,56	11086,56	37058	201365,3	25487,7	76159,88
SNP25	4313601	3609729	1535496	2454983	2795717	990705,3	1521432	945889,9	1194985	2525554	2758393	3398040
CASA2	32397920	32712750	18408700	84174110	55163530	65774500	26679750	62894010	18728700	2603047	1278154	3658347
ASAP1	216970,2	157586,4	210060,2	175794,6	384291,3	12127,05	11385,24	232879,2	122977,2	114225,3	324230,1	128716,7
BT3L4	5240126	927649,4	6265381	4136608	431882,4	4700153	667431,4	869173,5	923426,1	4328955	5006997	4515963
MAST4	2922372	4970283	3672392	4503238	5113209	5840409	5134575	5255084	1686656	5586520	6322301	5743489
COMP	33557,03	30501,13	103895,3	104432,6	238478,7	137805,2	320999,6	57436,09	149212,5	175899,1	170194,5	40602,92
BMP2K	805425,6	944192,3	1487935	1417922	388571,9	1171166	983974,4	1241611	1470824	716548,5	1066739	199853,7
TIM9	1748408	427545,6	939749,2	1083881	474875,2	1457716	241345,9	554520,9	115155,3	2964311	4906093	3831121
NOLC1	1641936	1641936	7170,19	8155,38	8155,38	17119,42	8901,41	9520,08	87376,92	433910	433910	79249,29
NOVA1	100556,2	387210,7	779805,6	532331,9	1978272	166516	581448,3	659591,3	746546,5	447219,1	1258457	195659,1
NOVA2	100556,2	387210,7	779805,6	532331,9	1978272	166516	581448,3	659591,3	746546,5	447219,1	1258457	195659,1
FACE1	6864673	4462592	8618912	12904810	6498595	5601383	11019540	5912127	9142236	15781360	15585780	8557188
SGPL1	15688040	14503440	19487870	13696560	12354120	14496590	18653940	14866810	16192610	16031130	20503730	8871345
CAB39	1883602	4237461	5413214	367761,7	1026817	3090609	3977554	1353461	1786307	1716491	2945704	240708,4
NU153	804222,9	1235288	2080756	672138,6	1691667	1360329	239964,5	1281291	394068,7	2506262	2779394	2118934
TWF1	2301732	1458757	1687191	234185,4	1776804	774816,4	5287732	283158,3	501494,2	1650589	2314736	123565
PLSI	2545126	1740336	2698662	129975,1	198924,8	929136,6	5333768	597194	348815,2	435929,9	436885,4	276754,3
RPGF4	712636,5	1006285	1553748	1192504	533486,3	534991,4	1630346	1435917	1460601	388243,9	965993,9	576216
OSTF1	2545707	1686252	1528677	520094,3	1994937	1055210	2493307	1682548	715095,3	2284707	1653444	1726522
GT251	293500200	6647131	8225622	7748844	12291770	22035910	10016300	7190097	8618146	1764812	17753380	14991170
NUDT3	10831850	11753700	12631940	5923433	4140211	8553534	6004182	6505670	3928134	7711059	10732490	8890847
RL13	207643300	239564300	315075800	298821900	220468500	151869600	261365200	274402400	223953400	204850800	264600800	190374500
REM2	6424388	8697052	11332270	412481,2	4278569	6339192	5411770	6631778	4139111	4225289	5932382	4111270
TXLNA	141562,3	45370	265621,4	149187,8	149187,8	149187,8	221415,3	221415,3	79501,68	49278,55	458845,9	458845,9
HSDL2	378856,7	148855,1	411206,5	1146210	44201,18	579155,2	377705	515912,3	357826,7	834591,5	759435,3	674994
RBGPR	4782643	8485791	9786691	5136944	6069662	6800099	9781943	6354516	14003140	4835592	7610070	2446741
AEDO	781958,5	477477,8	901291,9	1606006	368527,7	674340,7	650027,2	683963,5	291981,2	625914,5	548303,9	439467,4
MRCKA	83341,4	112746,5	9767,22	137540,2	143726,7	143726,7	335999,8	317291,7	226515,9	164576,3	275474,6	32875,43
SBDS	6257674	2048364	2851866	6292170	5078157	3938166	1180443	2057120	2471494	4195610	6202071	5346191
AKT2	1624528	1160389	1474475	2810233	2355519	2650111	3546472	3287009	2959667	3923697	2719431	3912234
MEA1	543607,3	300851,4	1021980	284839,3	170779,1	170779,1	70969,28	79376,43	100214,3	774978	542095,2	387063,6
MARK2	607655,7	520987,6	1051280	2210012	704120,1	646388,3	1231304	615199,9	1489513	209481,2	1063732	760525,1
TOR1B	2826262	3597792	5381964	2274952	3184675	5034488	3983922	2577783	3032132	4733588	5855466	2693399
RBM12	1573219	1511083	1168926	1638175	948046,3	471862,3	2367846	2564458	1925270	1424099	996336,3	926025,3
GRPE1	6528546	2291822	3780805	6956267	1064435	8672984	1713757	2562089	1866857	3393611	6304673	6515098
NIPBL	79332,35	42388,66	88573,69	84355,63	15322,53	15322,53	24753,83	74510,12	74510,12	82535,95	101785,2	79443,05
PTN23	429879,8	428634,6	365047,5	1092563	433049	249156,1	450346	419067,9	254243,9	1252502	213452,8	415397,6
MARE3	7719056	10161890	14019250	7853753	12728070	7421619	5665381	17602620	3139573	7814152	15778740	13429320
TPPC5	4272715	4993020	5589085	4325648	4121819	3835873	3165036	3279320	1325170	5256999	8101902	4234694
ARMC1	88290,07	36530,53	36530,53	58309,71	273903,9	124918,5	69060,78	14142,85	14142,85	270012	207472,9	270012
WBP11	2810900	3028000	5585692	624397,5	66349,97	2068453	4261990	3895668	5094509	2137499	1553562	73663,18
DYN1	26414130	21342680	31889680	40114870	18224270	18658960	27432160	30989210	37556050	23075120	32157750	18461490
TEN4	469910,5	779473,5	671793,3	1414509	809085,2	3992184	4041496	2132108	3450339	938487,1	558395,1	865506,2
CCDC6	678295,6	607698,4	986707,2	2458897	347780,4	601224,3	447338,4	117776,7	203294	468541,2	492030,3	628314
NRDC	3627417	149933,3	4641720	7640352	3925465	1524902	6822355	4304532	6947733	3110781	4725949	1747130
EHD3	2519765	4513459	5301795	1120383	901965	2354195	3800207	3077711	1912998	1484129	2756068	455906,2
CPSF3	423662,4	291449,2	132214,1	656700,1	2990608	573104,8	243052,8	852173,8	177401,6	440362,4	632559,2	1251504
DNJB2	385964,5	17312,39	229462,7	285505,2	285505,2	213547,7	14161,3	14161,3	87272,03	128447,8	352941,6	21433,91
INP4A	2009876	2434310	1461959	2141958	1913872	5154299	501642,3	1068065	1977884	2694982	1876000	1768499
AGAP3	1024144	1562666	1757514	2371853	1314861	1898064	1377500	1248861	1446638	1383019	2452443	964936
SAFB1	9164466	9045018	17504910	18350200	17151120	89519300	7949514	20512780	63965510	8780796	14805400	15063320
UBF1	1800962	1363450	1770082	1958018	2671584	6489533	1103867	2884114	1722578	1463928	5815715	5024796
SNX5	3629469	4812293	5278834	1537252	1517073	2786734	1798236	874297	1756181	1771867	2934458	1626947
CPSF5	5919415	6626385	10210140	3503151	5244011	5939493	7431600	2495736	6013596	5485658	9236745	2354668
TRM6	477109,9	513797	672939,1	643885	496438,7	956699,1	918674,1	504645,3	897286,1	1711431	1143723	429930,3
DIK2A	470189,2	308892	637808,6	529667,5	617556,4	738221,1	1197397	756842,4	609327,2	496099,8	1254270	294586,3
SYLM	2187693	2702217	3396123	6678859	1994880	3778668	7966771	5039145	4880118	2393141	4347522	1157650
LDHB	54991060	483072,6	3066321	45972080	556846,7	962472,7	400507,9	190794,5	866449,4	1164630	1124072	623564,4
KHDR1	14091520	7062206	17492260	28191860	251264,6	11508640	11115170	19284010	23119190	20978760	25196210	16696250
OTU6B	1293802	772057,3	1219558	241162	241162	1149848	331624,5	305287	229412,3	967077,4	1194575	760756,4
MAP11	62409,66	69317,85	183773,6	2853216	862578,5	747344,5	631935,2	646623,9	1045024	233435,5	421388,3	103934,2
TITIN	6230108	5189472	6176635	3422269	846810,7	4292577	5395644	6046521	5928833	1511923	1263004	973878,7
CBR3	6473498	7387865	7194379	47377460	35693570	41527210	25980840	31851920	33402010	26278700	33272300	20496690
TRFE	39224580	29904770	36638300	762822300	854916800	591365900	616187500	618898300	322291800	616594900	625049800	754925200
BRE1B	285805,4	814319,3	353014,4	2299449	1649747	337485,8	520631,9	816251,9	333537,2	408752,3	957620,7	998375,2
SOGA3	192340	1285970	262526,6	1130961	712813,4	217138,7	1368516	155833,8	1365039	398921,4	836423,5	358816,2
RRAGC	1354060	1794995	2902045	921852,8	49527910	2073194	3591035	767137,8	4423230	51008390	64215460	212793,4
RRAGD	1354060	1794995	2902045	921852,8	49527910	2073194	3591035	767137,8	4423230	51008390	64215460	212793,4
VAPA	10188350	7879994	10179640	10544250	17510150	7267609	3492720	4639096	1593106	10747710	14856610	16100220
ERLEC	136017,7	47636,98	47636,98	2039493	44551,16	87175,3	61782,56	74991,48	61625,92	91443,34	91443,34	401046
PHIP	169081,7	111405,6	172300	97198,26	24081,97	109619,6	428673,7	234713,8	135231,5	22493,92	189514	26765,4
BAF	41623260	10968870	34443590	25610790	523517,5	34079380	3801726	11988130	6458037	48679700	51683250	42600490
VNN1	59966,05	81812,09	184322,9	56674,28	932144,8	1086492	1291974	224497,5	435343	1170649	757445,9	1602372
KCY	87253530	89417240	108906800	39384770	45949980	59789990	33086540	39680660	28528400	80886580	98684050	90028210
TPC11	42194,8	114968,2	488588,1	410795,4	176802,2	261153,5	805626,3	472115,2	300941,3	715678,1	754201,1	88884,65
VIME	19036110	18733210	23027410	30849950	18757780	12323130	19935250	21821700	20926490	10910360	22504340	13026470
GAPR1	152540,9	30504,91	285340,1	39302,01	68398,15	562493,2	11753,9	266860,5	31734,5	762186,9	781846	396027,5
FA50A	1822117	338045	743645,6	746982,7	336223,5	517186,7	321736	800347,1	308188,4	995777,4	550379,3	261670,7
2A5D	577955,3	188308,7	1107479	646430,9	235474,3	1000539	757465	619221,2	213776,9	2043058	1166297	338679,5
PABP3	109846600	116484200	147616900	122237600	105495800	89425290	92161300	108936700	72388040	114139000	146958700	103032600
KLC4	248704,6	245427,2	192215	1656508	1250710	148811,8	344467,7	939330,4	24907,87	181028,2	685817,2	837307,4
SPEE	9051565	3725652	15534530	11898670	1724574	11213060	5116629	10369210	10756160	1840339	4019100	1316379
FIBB	3028246	1964979	2051204	10827800	13209900	12193390	14708090	6845849	3888113	13827740	12576570	16483380
TBA8	701974100	544954900	782712700	537020600	482321100	460217300	534918600	502940000	376115500	536877900	664602900	440048300
UFC1	2389706	3265369	4448439	3099492	2757506	2112126	2184803	2071344	2099090	2885020	4498024	2763092
COR2B	2921852	2748357	3511072	3722070	3171318	3018463	3789649	3665383	3439779	2613491	4321670	2261317
ERLN1	33927620	25750300	32368230	59695470	39592490	33536660	63065360	52821270	37110280	46211760	55538620	34129480
ADH7	5128466	5003144	4720015	19131240	18645587	19224460	10270760	10972330	6194415	6826034	9614123	6477772
2A5G	534629,7	67791,07	1023115	607344,8	90289,44	895455,5	619832,7	545636,8	75176,8	1820123	754440,5	220142,2
WDR61	3332967	4706117	6362628	2786661	1681700	4423162	5323202	4015408	4071063	2106860	2746471	1383371
SAFB2	4758757	2735316	10738580	22515760	8880018	84258530	1935677	11353370	59153020	4729723	9449235	10965700
CWC22	782312,3	902121,5	1030688	737483,9	465926,9	1676790	1811654	764106,5	1557240	692233,9	1065362	515984,3
TRM2A	12696010	20342530	30207910	22894350	20474280	1999335	1582505	18398220	24655530	3233335	22231740	14639830
EHD4	739379,5	1258939	1193323	839691	435238,9	187230,3	1115931	677047,8	763434,8	488490,5	2256630	304274,7
CILP2	1872227	99078,69	742488,7	3991505	4234703	159988,6	73551,32	413026,8	1006153	619041,7	4777646	31054,47
SIK3	218579,6	23412,5	14396,46	111325,5	111325,5	111325,5	16268,07	16268,07	16268,07	1099032	122365,1	328421
CO2A1	19789220	327623600	1138061	1599727	444691,1	4487113	9806730	5314553	3618332	1305710	431103500	6738596
MTX1	81572780	1754786	2399134	2619073	2452564	3577717	2938017	3552860	1735592	2929426	5069489	2878233
OGA	848301,5	611118,8	1113900	732537,8	1123226	525180,7	840479,6	1011472	901802,6	1130722	1236687	740230,8
PAX6	63749,63	8991,85	6569,06	140378,5	140378,5	140378,5	10470,33	8464,61	8464,61	94737,82	190433,6	45937,72
DCAF8	94289,84	53586,33	105885,6	118428,5	319239,4	65284,17	36508,59	36508,59	36508,59	153280,3	153280,3	173767
PRDC1	12419460	14922890	21564280	14887540	16663090	18726460	20117900	16905230	13348380	24493290	28533100	15993370
RPGP2	515808,7	741222,1	878351,5	412977,8	118895,3	348583,6	993401,2	620123,4	650098,6	374558,1	863051,3	200860,5
AFG2H	16963600	17414100	25017970	27210450	12978070	11419870	18186650	20427980	14971650	20082570	21918740	10123950
NSMA3	258910,6	632494,7	234615,9	106206,6	745462,1	701865,5	1173993	725533,1	369705,4	1007420	1280290	245120,2
TAOK1	41778,71	41778,71	41778,71	357987,9	357987,9	49600,01	199885,3	44256,06	170917	29235,49	25349,66	48435,26
K2C75	319321100	367674900	178781000	1163796000	970193500	519146700	2855542000	574649800	812905200	667142700	379617900	563467400
BIG1	2610016	3917590	6403838	5481389	3175966	4715262	7124683	5195641	8790442	3082493	7042871	1833826
CDK9	30467520	41562390	52055710	34549340	35863150	35832450	37101640	30079160	36657450	40186280	48222150	30386370
TS101	1539737	2568330	3079148	614416,8	953616,9	1349710	2798600	828928,6	2119667	931566,7	2191970	235513,1
